# Supplementary material
Source: Research Square preprint supplement (doi:10.21203/rs.3.rs-9224570/v1)
Supplement: Supplementary file 1 [file 7013e9e5a9df5c691d34f9e1.xlsx]

## Sheet: S1
Annotation results of the ScType + scMarkerAgent + LLM framework across five datasets
cluster:	Cluster ID after Seurat-based preprocessing.
selected_celltype:	The final cell-type annotation selected by the framework.
confidence:	The confidence level of the annotation, categorized as high, medium, or low.
reasoning:	The rationale provided by the LLM for selecting this annotation. In this study, the model used was ChatGPT-5 (gpt-5-2025-08-07 version).
key_markers_validated:	A list of key markers supporting the annotation.
Human Lung						Human Pancreas						Human PBMC						Mouse Pancrease						Human Glioblastoma						Mouse Type 2 Diabetes						Rat Lung
cluster	selected_celltype	confidence	reasoning	key_markers_validated		cluster	selected_celltype	confidence	reasoning	key_markers_validated		cluster	selected_celltype	confidence	reasoning	key_markers_validated		cluster	selected_celltype	confidence	reasoning	key_markers_validated		cluster	selected_celltype	confidence	reasoning	key_markers_validated		cluster	selected_celltype	confidence	reasoning	key_markers_validated		cluster	selected_celltype	confidence	reasoning	key_markers_validated
0	CD8-positive, alpha-beta cytotoxic T cell	high	CD3D/CD3E together with CD8A and cytotoxic effector molecules (GZMB/GZMA) best match alpha-beta CD8 cytotoxic T cells, capturing both TCR lineage and cytotoxic function; 'CD8-positive T effector cell' is close but its overlap lacks CD3 lineage markers; 'effector memory T cell' and 'tissue-resident memory T cell' hinge on residency/EM features (e.g., CD69, CCR7/CD45RO, ITGAE) that are not coherent…	CD8A, CD3D, GZMB, GZMA		0	pancreatic A cell	high	The cluster shows strong alpha-cell identity with coherent overlap of GCG, IRX2, and SCG2 (plus supportive TTR and ALDH1A1) and no negative-marker conflicts, so pancreatic A cell is most appropriate; α-cell is rejected because its negative marker VIM overlaps the cluster; stem cell-derived alpha-like cell is less appropriate as an in vitro derivative with minimal marker overlap; trunk-derived end…	GCG, IRX2, SCG2		0	naive thymus-derived CD4-positive, alpha-beta T cell	high	CCR7, SELL (CD62L), CD27 and LEF1 collectively define a naive CD4 T cell with thymic imprint and lymphoid-homing phenotype seen in flow cytometry and single-cell studies; an activated CD4 T cell would typically downregulate CCR7/SELL and upregulate activation markers, which are absent here, so the 'activated CD4 positive T cell' candidate is biologically inconsistent.	CCR7, SELL, LEF1, CD27		0	type B pancreatic cell	high	This cluster shows a canonical β-cell program with strong overlap for Ins1/Ins2, Pdx1, G6pc2, Iapp, Pcsk1, Slc2a2 (GLUT2) and Ucn3, plus endocrine markers (Syp) and β-cell receptor PRLR, coherently matching mature in vivo β-cell identity and known flow cytometry/transcriptomic signatures; the 'mature β-cell' candidate, while plausible, lacks key β-defining markers (G6pc2, Iapp, Pcsk1) and include…	Ins1, Ins2, Pdx1, G6pc2, Slc2a2		0	microglial cell	high	The microglial cell candidate shows a broad, canonical microglia signature (TMEM119, CX3CR1, TREM2, C1QA and many others) that defines brain-resident microglia in vivo and matches established single-cell and flow cytometry phenotypes; by contrast, tumor-associated microglia has fewer overlapping markers and is context-specific, non-classical monocyte and natural killer cell rely mainly on FCGR3A/…	TMEM119, CX3CR1, TREM2, C1QA		0	α-cell	high	The overlap for α-cell includes the core alpha-lineage transcription factor Arx together with the hallmark hormone Gcg and the processing enzyme Pcsk2, plus Mafb—all a necessary and sufficient combination that discriminates bona fide α cells in mouse islets and matches established single-cell and surface-phenotype knowledge. Pancreatic A cell was rejected because its broader marker list (e.g., Ac…	Arx, Gcg, Pcsk2, Mafb		0	T cell	high	Cd3g and Cd3d are core TCR complex components that robustly mark pan-T cells, supporting a general T cell identity in rat lung. The CD4 positive T cell population and CD8-positive, alpha-beta cytotoxic T cell candidates each overlap only on Cd3d and lack subtype-defining markers (e.g., Cd4 or Cd8), so they cannot be confidently assigned and were rejected.	Cd3g, Cd3d
1	pulmonary alveolar type 2 cell	high	The overlap displays a full AT2 program with lineage-defining surfactant genes and lamellar body machinery (ABCA3, SFTPC, NAPSA, LPCAT1, SLC34A2), most consistent with an in vivo pulmonary alveolar type 2 cell. Rank 2 (pulmonary alveolar epithelial cell) mixes AT1/AT2 features (e.g., HOPX) and is less specific; Rank 1 is an in vitro iPSC-derived state rather than the native identity; Ranks 4–8 em…	ABCA3, SFTPC, NAPSA, LPCAT1, SLC34A2		1	acinar cell	high	The cluster shows a comprehensive acinar exocrine signature with abundant digestive enzyme and zymogen granule genes (CPA1/2, PRSS1/2/3, CTRB1/2, AMY2A/B, PNLIP, GP2, REG1A/B/3A, CEL), best matching mature acinar cells; the top 'acinar cell' candidate has the broadest canonical overlap including GP2 and PNLIP, supporting mature pancreatic acinar identity. 'pancreatic acinar cell' is plausible but…	CPA1, PRSS1, CTRB1, GP2, PNLIP		1	naïve CD8 positive T cell	medium	Co-expression of CD8A and CD8B is canonical for CD8 T cells and most coherently supports a naïve CD8 positive T cell; no negative-marker conflicts. Other options are less appropriate: the thymus-derived alpha-beta label would require explicit thymic/alpha-beta/naive-signature markers (e.g., CCR7/IL7R/TCF7) not observed; conventional/mature/T cell subset/non-senescent are overly generic; mature al…	CD8A, CD8B		1	type B pancreatic cell	high	The overlap includes hallmark β-cell genes (Ins2, Pcsk1, Pax6, Neurod1) and secretory machinery (Syt13) plus PRLR, coherently defining pancreatic β-cell identity in vivo; this set best matches validated single-cell β-cell signatures and known phenotypes. The 'mature β-cell' candidate lacks key maturation/identity markers (e.g., Pcsk1, Pax6) and includes less canonical features (Prss53, Sytl4), we…	Ins2, Pcsk1, Pax6, Neurod1, Syt13		1	macrophage	high	Macrophage was selected because the cluster shows a comprehensive tissue-macrophage program with CD163, CD68, CSF1R, MSR1, C1QA/C1QB/C1QC, FCGR1A, TYROBP, LYZ, HLA-DRA and ITGAM/ITGAX, matching canonical flow-cytometry and scRNA-seq macrophage signatures. Monocyte and myeloid cell labels are too generic and lack the complement-rich macrophage identity; monocyte-derived macrophage is less coherent…	CD163, CSF1R, MSR1, FCGR1A		1	mature β-cell	high	The overlap includes core β-cell identity markers Ins1, Ins2, G6pc2, and Pcsk1 (plus Prlr), which are necessary and sufficient to define mature pancreatic β-cells and match validated single-cell and flow cytometry phenotypes. The top-ranked “type B pancreatic cell” is less specific and includes Aldh1a3 (a dedifferentiation/stress marker), making it a broader state mix rather than a lineage-defini…	Ins1, Ins2, G6pc2, Pcsk1		1	B cell	high	Cd79b is a lineage-defining B-cell receptor component and surface marker widely used in flow cytometry and single-cell studies, making B cell the most coherent annotation for a normal rat lung cluster. The alternative 'Be cell' is a non-standard label and its single marker Igkc is a secreted immunoglobulin constant region that is less specific to B-cell identity and can be expressed by antibody-s…	Cd79b
2	goblet cell	high	Goblet cell is supported by a coherent mucin/secretory program with hallmark markers MUC5AC, SPDEF, AGR2, BPIFA1 and CEACAM6 that define airway goblet identity in vivo; the top-ranked 'secretory cell' is too broad and lacks goblet-specific regulators, 'suprabasal cells with a secretory signature' has minimal overlap and not goblet-defining, 'differentiating basal cell' features basal keratins wit…	MUC5AC, SPDEF, AGR2, BPIFA1		2	stem cell-derived beta cell	medium	The overlap of INS and IAPP establishes insulin-producing identity, while DLK1 and HOPX are characteristic of immature/stem cell-derived β-like cells, making this annotation most coherent with an in vitro-derived β-cell phenotype; HADH supports β-cell metabolic programming. The top-ranked 'type B pancreatic cell' includes INS/IAPP but is confounded by prominent neuronal/neuroendocrine genes (ADCY…	INS, IAPP, DLK1, HOPX		2	memory CD4 positive T cell	medium	S100A4 and AQP3 co-occur as canonical memory CD4 T cell markers, supporting a memory CD4 identity without over-specifying subtype. The central memory CD4 candidate is less secure because subtype-defining markers (e.g., CCR7/IL7R/SELL) are not observed, and annexins (ANXA1/ANXA2) are not specific for central memory. Effector memory CD4 is weaker due to lack of AQP3 overlap here. Central memory CD8…	S100A4, AQP3		2	pancreatic ductal cell	high	Pancreatic ductal cell best fits the cluster based on a cohesive ductal epithelial program with Sox9, Krt19, Cftr, Hnf1b, plus Muc1, Spp1, Ocln, Itga6 and Cd44, which together define mature pancreatic duct identity seen in single-cell studies and surface phenotypes. Duct epithelial cell and generic epithelial labels lack key duct-specific features such as Cftr, Spp1 and Ocln. Progenitor labels (t…	Sox9, Krt19, Cftr, Hnf1b		2	tissue-resident memory T cells (T_rm)	high	The cluster co-expresses defining T_rm features including CD69, CXCR6, and CXCR3 with CD8A (and cytotoxic genes), aligning with tissue-resident memory CD8 T cells in vivo. Generic labels (T cell, lymphocyte) are too broad; cytotoxic/CD8 T-cell options capture cytotoxicity but lack residency-defining markers; progenitor-like exhausted is inconsistent with strong effector gene expression; central m…	CD69, CXCR6, CXCR3, CD8A		2	pancreatic D cell	high	pancreatic D cell is supported by overlap of lineage-defining delta markers Hhex and Sst (with endocrine Pdx1), which together are sufficient and specific for mature D cells; bihormonal or four-hormonal candidates (Sst+Ppy only) lack delta-defining TFs and suggest rare transitional states; PP cell options rely on Ppy/Pyy/Tspan8 without Hhex and conflict with strong Sst; epsilon cell lacks Ghrl an…	Hhex, Sst, Pdx1		2	alveolar macrophage	high	In normal rat lung, the overlap of Sirpa and Cd68 with lysosomal Ctsd and lipid-catabolic Naaa coherently matches resident alveolar macrophage biology (surface phagocyte phenotype and surfactant turnover), providing a more specific AM signature than generic macrophage candidates. Alternatively activated macrophage (Mrc1, Arg1) is less appropriate in steady state and relies on a limited, M2-skewed…	Sirpa, Cd68, Ctsd, Naaa
3	respiratory basal cell	high	Respiratory basal cell best fits because the overlap includes canonical airway basal markers KRT5, TP63, KRT15, and SOX2 that define TP63+KRT5+SOX2+ basal stem cells in respiratory epithelium; KRT17 further supports a stressed basal phenotype within the same lineage. The 'basal cell' and 'epithelial basal cell' options are generic and lack airway specificity; 'basal cell of epithelium of bronchus…	KRT5, TP63, SOX2, KRT15		3	mature β-cell	high	The cluster shows a definitive β-cell identity with hallmark maturity and function markers (INS, MAFA, G6PC2, ABCC8, UCN3, PCSK1, PDX1), best captured by the mature β-cell label; while 'type B pancreatic cell' has extensive β markers, the explicit maturity markers (G6PC2, UCN3, ABCC8) favor the mature β-cell annotation; 'insulin secreting cell' and 'beta-like/stem cell-derived beta' lack breadth …	INS, MAFA, G6PC2, UCN3, ABCC8		3	naive B cell	high	The cluster shows a classic naive B-cell signature with BCR components (CD79A/CD79B), CD20 (MS4A1), CD23 (FCER2), and TCL1A, which together define naive/transitional B cells in vivo and match flow cytometry and scRNA-seq profiles. The broader 'B cell' label is less specific despite overlap; the presence of TCL1A and CD23 argues specifically for naive rather than generic B cells. MHC-II-high and H…	MS4A1, CD79A, TCL1A, FCER2		3	β cell cluster	high	Ins2, Ins1, Iapp, and Ppp1r1a together represent a canonical pancreatic β-cell transcriptional signature, making 'β cell cluster' the most coherent fit. 'type B pancreatic cell' lacks Ppp1r1a and uses ambiguous terminology; 'mature β-cell' misses Iapp and Ppp1r1a; 'beta cell lineage' matches only Iapp and is overly broad; 'TH positive β-cell' implies TH expression not shown and overlaps only Ins1…	Ins2, Ins1, Iapp, Ppp1r1a		3	mesenchymal glioblastoma multiforme	high	The cluster expresses a canonical mesenchymal GBM hypoxia/angiogenesis program (CHI3L1, SERPINE1, VEGFA, ANGPTL4, ADM, NDRG1, BNIP3, VIM), best matched by the mesenchymal glioblastoma multiforme candidate that uniquely captures SERPINE1 and multiple hypoxia markers. The mesenchymal-like option is less specific and includes EGFR, more typical of classical GBM. The NMF mesenchymal-hypoxia module is…	CHI3L1, SERPINE1, VEGFA, BNIP3		3	type B pancreatic cell	high	The cluster shows definitive β-cell identity and maturity markers (Ins1/Ins2, Ucn3, Mafa, G6pc2, Nkx6-1) alongside secretory granule and exocytosis genes (Chgb, Iapp, Syt4/Syt13), making “type B pancreatic cell” the most lineage-specific and sufficiently discriminative match. “mature β-cell” is plausible but its overlap includes Dcx and Sytl4 and lacks several core β-cell features captured in the…	Ins1, Ins2, Ucn3, Mafa, G6pc2		3	natural killer cell	high	The overlap includes canonical NK effector markers (Ccl5, Gzmk, Gzmm) that collectively define cytotoxic innate lymphocytes, aligning with known NK cell phenotypes in vivo; this coherent signature is stronger than the single-marker overlap for CD8 T lineages. The CD8-positive T cell and CD8-positive, alpha-beta cytotoxic T cell candidates were rejected because their overlaps contain only Cd8a wit…	Ccl5, Gzmk, Gzmm
4	blood vessel endothelial cell	high	The cluster shows a robust vascular endothelial program with PECAM1, VWF, TEK, CLEC14A, ENG, ESAM, ICAM2, EPAS1, FLT1, THBD, and related markers that define blood vessel endothelial cells and match validated flow cytometry and single-cell signatures, making this the most coherent choice. The generic 'endothelial cell' is less specific despite overlap; lung endothelial cell and lung microvascular …	PECAM1, VWF, TEK, CLEC14A		4	pancreatic A cell	high	The cluster expresses canonical alpha-cell identity markers including ARX, GCG, PCSK2, MAFB, IRX2, CHGB and the surface enzyme DPP4, matching the comprehensive in vivo profile of pancreatic A cells, with no conflicting negative markers. The 'α-cell' candidate is rejected due to overlap with its negative marker PPP1R1A, and 'endocrine progenitor alpha cell' is rejected because GCG overlaps its neg…	ARX, GCG, PCSK2, MAFB, DPP4		4	CD4-positive, alpha-beta memory T cell	high	Co-expression of S100A4 and IL7R robustly marks memory CD4 alpha-beta T cells in scRNA-seq and aligns with known phenotypes (CD127 high); thus a general memory CD4 label is most appropriate. Central or effector memory were rejected due to lack of discriminating markers in the overlaps, making those assignments over-specific; naive CD4 was rejected because S100A4 is typically absent; helper T cell…	S100A4, IL7R		4	pancreatic A cell	high	The cluster shows a coherent α-cell program with strong overlap for lineage-defining and functional markers (Gcg hormone, Arx and Mafb transcription factors, and Pcsk2 for prohormone processing), along with Irx1/2 supporting mature α identity—most consistent with pancreatic A cells in vivo. The simpler “α-cell” candidate has fewer overlapping markers and is less specific than the broader α progra…	Arx, Gcg, Mafb, Pcsk2		4	astrocyte-like cell	high	Astrocyte-like cell is most coherent because the overlap includes astroglial lineage-defining markers SOX9 and MLC1, with HOPX and EGFR consistent with astrocyte/radial-glia phenotypes in vivo. Neural stem cell and human neural stem/progenitor cells were less appropriate: while they share SOX2/NES/EGFR, they lack the astrocyte-specific markers (MLC1, SOX9) observed here and include OLIG1/OLIG2 su…	SOX9, MLC1, HOPX, EGFR		4	pancreatic A cell	high	The cluster shows the alpha-lineage core markers Gcg, Arx, and Pcsk2 together with Mafb, which coherently define pancreatic A (alpha) cells and are sufficient to distinguish them from closely related endocrine types. The rank-3 'α-cell' candidate shares key markers but the rank-1 'pancreatic A cell' includes additional alpha-associated genes (e.g., Irx2, Slc38a5) that strengthen specificity. 'imm…	Gcg, Arx, Pcsk2, Mafb		4	alveolar macrophage	high	Alveolar macrophage is most appropriate because the cluster overlaps multiple lineage-defining and tissue-resident AM markers (Pparg as a hallmark transcriptional regulator of AM differentiation, Sirpa as a myeloid surface receptor enriched in lung AMs, and Cd68 as a macrophage identity marker), coherently matching lung-resident macrophage phenotypes validated in single-cell studies; alternativel…	Pparg, Sirpa, Cd68
5	monocyte	high	The cluster co-expresses hallmark monocyte genes (LST1, LYZ, FCN1, CD14) together with inflammatory S100A8/A9/A12, fitting a monocyte identity rather than a more differentiated macrophage or neutrophil. Classical monocyte was rejected because its negative marker FCGR3A is present in the cluster (conflict). FCN1 monocyte was rejected as too restrictive given concurrent FCGR3A and CD163 indicating …	CD14, FCN1, LST1, S100A8		5	pancreatic ductal cell	high	The overlap shows a canonical pancreatic ductal signature with epithelial keratins (KRT19/KRT7/KRT8/KRT18), tight junction and luminal markers (CLDN4/CLDN1/MUC1), ductal transporter CFTR, and transcriptional regulators SOX9 and HNF1B alongside surface markers (CD24/CD44), collectively defining mature pancreatic duct identity in vivo. The ‘duct epithelial cell’ candidate is more generic and lacks …	KRT19, CFTR, SOX9, HNF1B, CLDN4		5	natural killer cell	high	The cluster shows a classic NK cytotoxic signature with strong overlap of lineage-defining and flow cytometry-validated markers (GNLY, NKG7, PRF1, GZMB, FGFBP2, FCGR3A, KLRD1, TYROBP, IL2RB, KLRC1, NCR3, CCL5/XCL2) and no conflicting negatives, best matching a natural killer cell; NK subtypes (Natural killer cell subset 1, CD16-positive, CD56-dim natural killer cell, human, CD56 positive NK cell)…	GNLY, NKG7, PRF1, FCGR3A		5	pancreatic D cell	high	The overlap includes Sst and Hhex, a hallmark delta-cell transcription factor, together with Cd24a consistent with endocrine identity, coherently defining pancreatic D (delta) cells. The pancreatic epsilon cell candidate is rejected because epsilon cells are defined by ghrelin and do not characteristically express Sst; the Ppy positive Sst positive bihormonal cell is rejected because the overlap …	Sst, Hhex, Cd24a		5	proneural	high	The overlap includes a comprehensive proneural/OPC-like malignant signature (PDGFRA, OLIG2, NKX2-2, SOX2, NES, ASCL1, DLL3, NCAM1) that defines the proneural program and features validated in single-cell glioma studies, with cell-surface markers (PDGFRA, NCAM1, DLL3) supporting phenotype-level identification; 'oligodendrocyte lineage' and 'oligodendrocyte precursor-like cell' fit normal OPC state…	PDGFRA, OLIG2, NKX2-2, DLL3		5	B cell	high	B cell is selected because the overlap includes lineage-defining BCR components Cd79a/Cd79b together with Ms4a1 (CD20) and Cd19, a combination that is necessary and sufficient for mature B-cell identity and matches established flow cytometry phenotypes (CD19+CD20+CD79a/b) and single-cell signatures; this discriminates B cells from other immune and stromal lineages. Leukocyte is rejected as overly…	Cd79a, Cd79b, Ms4a1, Cd19		5	alveolar macrophage	high	In normal rat lung, the co-expression of Pparg (lineage-defining TF for alveolar macrophages), Cd68 (macrophage lineage), Sirpa (tissue-resident macrophage receptor enriched in alveolar macrophages), and Ctsd/Naaa (phagolysosomal/lipid handling consistent with surfactant-rich alveolar niche) most coherently fits an alveolar macrophage identity and aligns with known flow cytometry/transcriptomic s…	Pparg, Cd68, Sirpa, Ctsd
6	ciliated cell	high	The cluster displays a robust motile cilia program with lineage-defining TFs (FOXJ1, RFX2) and axonemal/assembly components (DNAH5, DNAAF3, RSPH1, TPPP3, DNALI1, CFAPs), most coherently represented by the broad overlap in the 'ciliated cell' candidate. 'multiciliated epithelial cell' and 'respiratory tract multiciliated cell' are plausible but their overlaps are narrower and miss key dynein/assem…	FOXJ1, DNAH5, RSPH1, TPPP3		6	pancreatic D cell	high	Pancreatic D cell best fits because the cluster shows a classic δ-cell profile with SST and HHEX plus endocrine regulators PCSK1 and ISL1 and additional islet-associated signals (e.g., LEPR, CADM1), indicating mature pancreatic delta identity in vivo. Non-functional beta cell, beta-like cell, and mature pancreatic endocrine cell were rejected because SST without β-cell markers is incompatible wit…	SST, HHEX, PCSK1, ISL1		6	effector memory CD8-positive, alpha-beta T cell	high	Co-expression of CD8A/CD8B with GZMK, GZMA, NKG7, and CCL5 is a canonical effector-memory CD8+ T-cell signature; GZMK predominance over GZMB/PRF1 supports EM rather than terminal cytotoxic phenotype. MAIT cells typically require TRAV1-2/KLRB1 and are not indicated. The generic CD8+ cytotoxic T cell label is less specific and usually GZMB/PRF1-high. CD8+ memory T cells would show weaker NK/cytotox…	CD8A, CD8B, GZMK, CCL5		6	endothelial cell	high	The cluster shows a broad, lineage-defining endothelial signature with many canonical markers (e.g., Pecam1, Cdh5, Kdr, Flt1, Cd34, Egfl7, Plvap, Eng, Erg, Tie1, Esm1, Podxl), strongly supporting an endothelial cell identity. The pancreatic islet capillary endothelial cell candidate overlaps only on Pecam1 and Emcn, providing much weaker support and lacking the extensive endothelial surface/signa…	Pecam1, Cdh5, Kdr, Flt1, Cd34		6	CD8-positive, alpha-beta cytotoxic T cell	high	CD3D/CD3E with CD8A plus cytotoxic effectors GZMB/GZMA and CCL5 coherently define cytotoxic CD8+ alpha-beta T cells in vivo and in scRNA-seq; this cluster shows a robust TCR/CD3 and cytotoxic program consistent with that identity. B cell and plasma cell were rejected because their overlap_negative_markers include CD3D, a T-cell marker present in the cluster, creating a biological conflict per the…	CD8A, GZMB, CCL5, CD3E		6	mature β-cell	high	This cluster shows the canonical β-cell lineage and maturity program with Pdx1, Nkx6-1, Mafa, Ucn3, and G6pc2 alongside Slc2a2, Pcsk1, Ins1/Ins2, which is both necessary and sufficient to specify mature β-cells in mouse pancreas; Candidate 2 (type B pancreatic cell) is a non-standard label and adds broad or state markers (Glp1r, Ppp1r1a, Bace2) without improving specificity; Candidate 3 and 4 are…	Pdx1, Nkx6-1, Mafa, Ucn3, G6pc2		6	neutrophil	low	Selected neutrophil because the only overlapping positive marker G0s2 is consistent with myeloid/neutrophil transcriptional programs and there are no conflicting negative markers; despite the absence of canonical surface markers (e.g., S100a8/A9, Lcn2) in the overlap, neutrophils are plausible in normal rat lung. No other candidates were provided to reject; 'Unknown' was not chosen because the av…	G0s2
7	alveolar macrophage	high	The cluster’s markers align with a mature alveolar macrophage identity, combining lung-specific scavenger and lipid-handling signatures (MARCO, MRC1, PPARG, FABP4) with myeloid surface phenotype (ITGAX, VSIG4), a coherent in vivo profile for alveolar macrophages. The generic ‘macrophage’ and ‘myeloid cell’ options lack alveolar-defining markers; ‘tissue-resident alveolar macrophage’ overlaps but …	MARCO, MRC1, PPARG, FABP4, ITGAX		7	mature β-cell	high	The cluster’s overlap shows a canonical mature β-cell program with insulin production and glucose-sensing machinery (INS, PDX1, MAFA, G6PC2, ABCC8, KCNJ11, PCSK1, NEUROD1, UCN3) and no negative-marker conflicts, best matching mature β-cell identity in vivo. The top-ranked 'type B pancreatic cell' was rejected because its overlap includes DLK1 and IGF2, indicative of fetal/immature states. 'stem c…	INS, PDX1, MAFA, G6PC2, KCNJ11		7	hematopoietic stem cell	high	The hematopoietic stem cell candidate exhibits a coherent multiparameter HSC signature—CD34 together with stemness/early programs (HOXA9, SOX4) and HSC-enriched markers (SPINK2, CD164)—that matches canonical flow and single-cell profiles. LMPP and CLP/pre-B options have far fewer overlaps and hinge on CD34±DNTT, implying lymphoid priming but without additional lineage-defining markers (e.g., IL7R…	CD34, SPINK2, HOXA9, CD164		7	quiescent stellate cell	high	Quiescent stellate cell is most appropriate because the cluster overlaps include Pdgfrb, Des, Rgs5, Cspg4, and Sparc, a coherent perivascular quiescent PSC signature observed in vivo. The top-ranked pancreatic stellate cell lacks the pericyte-defining Rgs5 and Cspg4 and relies on generic mesenchymal markers (Vim, Des, Pdgfrb) with Eng that is less specific. Mesenchymal, fibroblast, pancreatic fib…	Pdgfrb, Rgs5, Cspg4, Des		7	astrocyte	high	Astrocyte is most appropriate because the cluster overlaps multiple canonical astrocytic markers (AQP4, SLC1A3, GFAP, MLC1, CLU/SPARCL1) that define mature/reactive astroglia in vivo; mesenchymal-lineage candidates (ranks 3–5) lack astrocyte-specific transporters/channels and instead show ECM/angiogenic programs; the ‘tumor mesenchymal stem-like cells’ candidate (rank 2) is rejected due to overla…	AQP4, SLC1A3, GFAP, MLC1		7	pancreatic D cell	high	Sst together with Hhex is a lineage-defining combination for pancreatic delta (D) cells and suffices to distinguish them from other endocrine types; additional overlaps (Pdx1) are broadly endocrine and do not detract from the delta identity. The epsilon cell candidate is rejected because true epsilon cells are Ghrl-driven and Sst is incongruent with their identity. The somatostatin secreting cell…	Sst, Hhex		7	neutrophil	high	S100a8 and S100a9 are canonical neutrophil granule/calprotectin markers and, together with G0s2, coherently define neutrophil identity in vivo; this overlap strongly supports a neutrophil cluster in normal rat lung. The alternative 'alveolar macrophage' candidate has only a single overlap (Clec4d), which is not lineage-defining for alveolar macrophages and lacks the typical alveolar macrophage si…	S100a8, S100a9, G0s2
8	alveolar macrophage	high	Alveolar macrophage is best supported by the broad overlap of canonical alveolar markers (FABP4, MARCO, MRC1, PPARG) plus resident-signature genes (C1QA, VSIG4, SIGLEC1, ITGAX, LPL, TREM2), matching established flow-cytometry and scRNA-seq phenotypes; tissue-resident alveolar macrophage is plausible but shows a narrower overlap; monocyte-derived alveolar macrophage has fewer matches and an ISG (I…	FABP4, MARCO, MRC1, PPARG		8	endothelial cell	high	The cluster expresses a broad, canonical endothelial program with multiple lineage-defining and flow-cytometry-validated markers (e.g., PECAM1, CDH5, KDR, CLDN5, plus VWF, ESAM, FLT1, PLVAP, CD34), which most coherently fits a general endothelial identity. The pancreatic islet capillary endothelial cell candidate, while plausible, lacks several core pan-endothelial markers present in the top cand…	PECAM1, CDH5, KDR, CLDN5		8	classical monocyte	high	The cluster shows a canonical classical monocyte signature (CD14 high with FCN1, S100A8/9/12, VCAN) consistent with flow cytometry and single-cell profiles; CD14-positive monocyte and broad myeloid/monocyte labels are less specific; CD14-positive, CD16-negative classical monocyte has a narrower overlap missing the S100A8/9 and VCAN hallmarks observed; S100A-focused and dysfunctional monocyte opti…	CD14, FCN1, S100A9, VCAN		8	macrophage	high	Macrophage is most appropriate based on strong overlap of canonical macrophage markers including C1qa/C1qb, Mpeg1, Adgre1 (F4/80), Csf1r, Cd68, and Itgam/Itgax, which define tissue-resident macrophage identity and typical flow-cytometry phenotypes; leukocyte and myeloid are generic and less specific; inflammatory macrophage and inflammatory activated macrophage signatures are narrower and lack th…	Adgre1, Csf1r, C1qa, C1qb, Cd68		8	oligodendrocyte	high	The cluster shows a canonical myelinating oligodendrocyte program with strong overlap for MBP, PLP1, MAG, CLDN11, OPALIN, UGT8, FA2H, ERMN, SOX10, OLIG1/2, and NKX2-2, which define mature oligodendrocytes in vivo. The OPC candidate is less appropriate because OPCs classically express PDGFRA/CSPG4 and lack high-level myelin genes; the presence of MBP/MAG/CLDN11/OPALIN argues against an OPC state. …	MBP, PLP1, MAG, CLDN11		8	type B pancreatic cell	high	The overlap for 'type B pancreatic cell' includes the core β-cell identity program (Ins2, G6pc2, Nkx6-1, Pcsk1, Iapp) together with endocrine lineage TFs (Rfx6, Mnx1) and secretory granule components (Chgb, Cd63, Syp), a combination that is necessary and sufficient to define β cells and distinguish them from other endocrine and exocrine cells; Aldh1a3/Gast likely reflect disease/state without cha…	Ins2, G6pc2, Nkx6-1, Iapp		8	alveolar macrophage	high	In normal rat lung, the overlap of Sirpa and Cd68 together with lysosomal enzymes Ctsd and Naaa coherently indicates resident alveolar macrophages, matching their phagocytic and immunoregulatory identity. The 'alternatively activated macrophage' candidate was rejected because only Mrc1 overlaps without broader M2 signature support; 'inflammatory macrophage' and 'macrophage' were rejected as they …	Sirpa, Cd68, Ctsd
9	basal cell	high	Basal cell is most appropriate because the overlap includes the canonical basal epithelial program—TP63 with KRT5/KRT14 and the basal-lamina adhesion integrins ITGA6/ITGB4 plus NGFR and PDPN—capturing lineage-defining features and flow-cytometry phenotypes. Respiratory basal cell is plausible but relies mainly on SOX2 and lacks ITGB4/F3 breadth; Airway basal stem cell fits airway context yet miss…	TP63, KRT5, ITGA6, ITGB4, NGFR		9	fibroblast	high	The cluster shows a rich fibroblast ECM signature with COL1A1, COL1A2, DCN, LUM, THBS2, SPARC, VCAN, FBLN1 and PDGFRA, which coherently defines tissue fibroblasts in vivo and matches known flow-cytometry/transcriptomic phenotypes. Higher-ranked alternatives were rejected because: mesenchymal cell is overly generic and lacks lineage-defining ECM core markers; pancreatic stellate/activated stellate…	COL1A1, COL1A2, DCN, LUM, PDGFRA		9	hematopoietic stem cell	high	The cluster overlaps include multiple canonical HSC features (CD34 surface expression with stemness regulators MSI2, ALDH1A1, SOX4, MYB and progenitor marker SPN/CD43), which best matches an HSC identity. The MEP candidate shows erythroid-committed signatures (GATA1, KLF1, HBD) inconsistent with a primitive stem state. The generic hematopoietic cell and CD43 positive fraction are too broad and la…	CD34, MSI2, ALDH1A1, SPINK2		9	B cell	high	Cd79a is a lineage-defining B-cell receptor component, and with Ptprc strongly supports a B-cell identity; the top-ranked 'leukocyte' is too broad despite Ptprc/Cd52/Rac2/Cd74, exhausted T cell and anergic CD4 T cell rely on a single activation/exhaustion marker (Pdcd1) not specific for lineage, T cell (Il7r) is similarly non-specific, dendritic cell (Ccr7) and plasma cell (Irf4) each have only o…	Ptprc, Cd79a		9	tumor-associated macrophage	high	The overlap for 'tumor-associated macrophage' includes a comprehensive TAM/DAM myeloid program with microglial lineage-defining and tumor-associated markers (TMEM119, TREM2, CSF1R, APOE, MERTK, MSR1, ITGAX) alongside macrophage identity markers (CD68, CD74) and HLA class II genes, coherently matching an in vivo TAM phenotype. 'activated microglia' was rejected because its overlap is limited to ge…	TMEM119, TREM2, CSF1R, CD68		9	mature β-cell	high	Nkx6-1, Ins2, and Ucn3 jointly provide a lineage-defining and maturity-specific signature of pancreatic β cells, making the 'mature β-cell' label both necessary and sufficient; the 'type B pancreatic cell' candidate, while β-specific, includes broader endocrine/state markers (e.g., Chga, Aldh1a3, Gast) that reduce specificity; 'endocrine cell' and 'β cell cluster' are too generic; 'extreme-like β…	Nkx6-1, Ins2, Ucn3		9	endothelial cell	high	The top-ranked candidate shows a robust set of canonical endothelial markers (Cdh5/VE-cadherin, Vwf, Plvap, Aqp1, Cav1, Ramp2) that define vascular endothelium and match well-established flow cytometry and single-cell signatures for lung ECs. Other candidates were rejected because they have sparse overlap and are less biologically coherent: 'CD117 positive EC clone' and 'a vasculogenic resident m…	Cdh5, Vwf, Plvap, Aqp1
10	pulmonary interstitial fibroblast	medium	The overlap includes hallmark lung interstitial fibroblast genes TCF21 together with INMT and GPC3, plus ACTA2 indicating an interstitial myofibroblast subset, which coherently matches validated pulmonary fibroblast signatures. Candidate 2 (mesenchymal cell) is rejected due to negative marker conflict with CD34. Candidate 1 (fibroblast of lung) is plausible but lacks TCF21 and is broader, not pin…	TCF21, INMT, GPC3, ACTA2		10	α-cell	high	The cluster shows a canonical alpha-cell program with overlapping markers GCG, ARX, MAFB, SCG2 (plus IRX2), which define mature pancreatic alpha cells in vivo; Rank 1 pancreatic A cell also contains alpha markers but its overlap includes non-alpha epithelial/stromal genes (e.g., MUC13, TM4SF4, FAP) reducing specificity; Stem cell-derived alpha-like/cell (ranks 2,4) are in vitro/immature with a sp…	GCG, ARX, SCG2, MAFB		10	B cell	high	Robust overlap of canonical B-lineage markers (MS4A1/CD20, CD79A/B, CD19) plus B-cell transcriptional/signaling features (BANK1, SPIB, FCRLA, IGLL5, MZB1, CD22, CD81, FCGR2B, FCER2) coherently defines a B cell phenotype used in flow cytometry and validated in single-cell studies. Memory B cell is rejected because its negative marker FCER2 conflicts with the cluster, which shows FCER2. Marginal zo…	MS4A1, CD79A, CD79B, CD19								10	oligodendrocyte precursor-like cell	medium	OPC-like identity is supported by overlap of OLIG2, CSPG4 (NG2), and EGFR, which together define oligodendrocyte precursor phenotype and the OPC-like GBM subpopulation, providing both lineage-defining transcription factor and cell-surface markers used in flow cytometry; in contrast, the top-ranked cycling glial cell overlaps only with generic S-phase/proliferation genes (TYMS, PCNA, H4C3, DUT) wi…	OLIG2, CSPG4, EGFR		10	mature β-cell	high	Nkx6-1 plus Ucn3 are lineage-defining and sufficient for mature β-cell identity in mouse pancreas, with Ucn3 marking functional maturity and Nkx6-1 specifying β-lineage; this combination discriminates from α, δ, and PP cells and aligns with single-cell literature. The 'endocrine cell' label is too broad and lacks specificity. 'type B pancreatic cell' is ambiguous, mixes broad endocrine markers (C…	Nkx6-1, Ucn3		10	CD8-positive, alpha-beta cytotoxic T cell	high	Cd8a and Cd3d together define alpha-beta CD8 cytotoxic T cells (CD8 coreceptor with the TCR/CD3 complex), and cytotoxic effectors like granzymes commonly co-occur in this lineage; the 'natural killer cell' option is rejected because NK cells are typically CD3- and the overlap includes Cd3d indicating T cell lineage; the generic 'T cell' lacks CD8 and fails to capture cytotoxic identity; the 'CD4 …	Cd8a, Cd3d
11	alveolar macrophage	high	The cluster exhibits a canonical alveolar macrophage signature with co-expression of lineage-defining and lung-resident markers (MARCO, PPARG, FABP4) and surface/functional macrophage features (MRC1, CD163), aligning with established flow cytometry and scRNA-seq profiles; 'macrophage' is too generic; 'tissue-resident alveolar macrophage' has a smaller, less comprehensive overlap lacking several h…	MARCO, PPARG, FABP4, MRC1, CD163		11	pancreatic PP cell	high	PPY together with endocrine transcription factors PAX6, ARX, and FEV (plus SLC6A4/AQP3) coherently defines pancreatic PP (gamma) cells in single-cell datasets, making 'pancreatic PP cell' the most specific and biologically appropriate annotation. The generic 'PP cell' candidate provides only PPY without corroborating lineage markers. 'Endocrine cell' and 'pancreatic endocrine cell' are too broad …	PPY, PAX6, ARX, FEV		11	CD16-positive, CD56-dim natural killer cell, human	high	The cluster shows a classic mature cytotoxic NK signature with FCGR3A (CD16), FGFBP2, S1PR5, PRF1/GZMB, KLRF1/KLRD1 and other NK receptors, which best defines CD56-dim, CD16+ NK cells used in flow cytometry and validated in single-cell studies; MKI67 indicates cycling but does not alter identity. Rejected: natural killer cell (too broad given the strong CD16/FGFBP2/S1PR5 profile pointing to the d…	FCGR3A, FGFBP2, S1PR5, PRF1								11	tissue-resident memory T cells (T_rm)	high	The cluster includes the TRM-defining program with ZNF683 (Hobit), CD69, and ITGA1 alongside CXCR3 and CD8A, which coherently indicates tissue-resident CD8 T cells; in contrast, higher-ranked generic cytotoxic annotations (effector T cell, cytotoxic T cell) capture activation/granule genes but lack residency-defining markers, while broader labels (lymphocyte, T cell, CD8-positive T cell variants)…	ZNF683, CD69, ITGA1, CXCR3		11	CD8 positive T cell	high	Cd8a and Cd8b1 are lineage-defining surface markers for alpha-beta CD8 T cells and together are sufficient to discriminate CD8 T cells from CD4 and gamma-delta T cells, matching established flow cytometry phenotypes and single-cell signatures. The generic 'T cell' candidate (Cd3d/Cd3e/Cd3g/Il7r) is less specific despite more markers; 'CD8-positive, alpha-beta cytotoxic T cell' lacks Cd8b1 and cyt…	Cd8b1, Cd8a		11	T cell	high	Cd3d and Cd3g are core CD3 complex components defining T cell receptor-bearing lymphocytes and are widely used as T cell markers in flow cytometry and validated in single-cell studies, making 'T cell' the most coherent choice. 'CD4 positive T cell population' and 'CD8-positive, alpha-beta cytotoxic T cell' each overlap only on Cd3d and lack lineage-defining Cd4 or Cd8 markers, so they are overly …	Cd3d, Cd3g
12	secretory cell	high	The cluster co-expresses a broad secretory program with lineage-defining markers including SCGB1A1 and SCGB3A1 (club/secretory), mucins MUC5AC/MUC5B (goblet), and antimicrobial secretions BPIFB1/LCN2/SLPI, which most coherently matches a mixed airway secretory identity rather than a pure subtype. Goblet cell (rank 2) was rejected because strong SCGB1A1/SCGB3A1/LCN2 co-expression indicates a club/…	SCGB1A1, MUC5AC, MUC5B, BPIFB1, LCN2		12	pericyte	high	Pericyte is most appropriate because the cluster shows the canonical perivascular signature PDGFRB+RGS5 together with cell-surface markers MCAM (CD146), ENG (CD105), and CD248 (endosialin), which define pericytes in vivo and in single-cell studies; competing candidates either lack this combination or emphasize fibroblastic ECM programs: pancreatic/activated stellate cells rely on COL1A1/COL1A2/FN…	PDGFRB, RGS5, MCAM, ENG, CD248		12	plasma cell	high	The cluster co-expresses canonical plasma cell markers TNFRSF17 (BCMA), SLAMF7, XBP1, MZB1, CD38, and ITGB7 that define mature antibody-secreting plasma cells and match established flow cytometry phenotypes; plasmablast was rejected because the ITGB7+ SLAMF7+ BCMA signature favors mature plasma cells over proliferative plasmablasts, 'antibody secreting cell' is too generic and lacks additional li…	TNFRSF17, SLAMF7, XBP1, MZB1								12	neural progenitor cell	high	Selected as most appropriate because the overlap includes core neurodevelopmental progenitor hallmarks (SOX2, ASCL1, OLIG2, OLIG1) and EZH2, with DLX5 indicating GABAergic lineage, coherently defining a neural progenitor program; the neuron candidate was rejected because its overlap is dominated by mature neuronal structural/synaptic genes (MAP2, SYT1, SYP, GRIA2) without progenitor TFs; glioblas…	SOX2, ASCL1, OLIG2, EZH2		12	endothelial cell	high	The cluster shows a comprehensive endothelial program with multiple lineage-defining and surface markers (Pecam1, Cdh5, Kdr, Flt1, Tie1, Cd34) plus endothelial TF Erg and capillary/fenestration markers (Plvap, Esm1), which are sufficient and specific for vascular endothelium in pancreas. The more specific 'pancreatic islet capillary endothelial cell' overlaps only Emcn and Pecam1, an insufficient…	Pecam1, Cdh5, Kdr, Erg		12	Unknown	low	No candidate cell types or marker overlaps were provided for this cluster, so a biologically supported annotation cannot be determined. With no candidates to evaluate, all alternatives are necessarily rejected due to lack of information.
13	respiratory basal cell	high	Respiratory basal cell is most appropriate because the overlap includes canonical airway basal lineage markers (KRT5, KRT14, TP63, ITGA6) plus SOX2, coherently matching in vivo epithelial basal identity and flow phenotypes; in contrast, cycling alveolar macrophage and cycling macrophage show only proliferation markers without macrophage-defining genes (e.g., LYZ, CD68, MRC1/MARCO), cycling pulmon…	KRT5, TP63, KRT14, ITGA6		13	pancreatic ductal cell	high	The cluster shows a strong epithelial ductal program with hallmark pancreatic duct markers (MUC1, KRT7/KRT19/KRT8/KRT18, SOX9, HNF1B, CFTR, CLDN4/CLDN1, CDH1, CD24, HES1) that define in vivo duct identity and match known flow cytometry (MUC1, CD24) and scRNA-seq signatures (CFTR, HNF1B, SOX9, CLDN4). Acinar cell/pancreatic acinar cell candidates are rejected because although REG1A/CTRB2/SPINK1 ap…	CFTR, HNF1B, SOX9, CLDN4														13	radial glial cell	high	The cluster shows a coherent radial glial signature with overlapping GFAP, SOX2, CLU, FABP7, and PAX6, which together define embryonic/neurodevelopmental radial glia in vivo and are widely validated in single-cell datasets; this multi-marker match is stronger and more specific than options with only GFAP. Candidate 2 (Differentiated GBM cell) is rejected because its negative marker SOX2 overlaps …	GFAP, SOX2, FABP7, PAX6		13	pancreatic ductal cell	high	The overlap includes a coherent, lineage-defining ductal program (Krt19, Sox9, Hnf1b, Cftr, Epcam, PKHD1), combining core transcriptional regulators and duct-specific functional markers sufficient to distinguish mature pancreatic ducts from other pancreatic lineages and states; presence of epithelial surface markers (Epcam, Prom1, Cd24a, Itga6, Cd44) matches known ductal phenotypes. 'epithelial c…	Krt19, Sox9, Hnf1b, Cftr		13	monocyte	high	Monocyte is most appropriate because the overlap includes Cd14, a canonical monocyte surface marker used in flow cytometry, alongside Fcnb and Fn1 which fit monocyte complement/adhesion signatures; this coherently reflects monocyte identity in lung. Fibroblast is rejected because its support rests solely on Fn1, a non-specific ECM gene also seen in immune cells, and it lacks classic fibroblast ma…	Cd14, Fcnb, Fn1
14	Alveolar Intermediate (ATi) cell	high	The cluster co-expresses AT1 markers (AGER) with transitional/AT2 features (KRT8, SFTPB), which is characteristic of ATi cells. Top-ranked mature AT1 was rejected because its negative marker KRT8 overlaps the cluster, indicating biological conflict; iAT1 YAP5SA was rejected due to overlapping negatives SFTPB and NAPSA. Endothelial stalk cell is unlikely given epithelial lineage markers (e.g., NKX…	AGER, KRT8, SFTPB, NKX2-1		14	type B pancreatic cell	high	INS with SYT4 and PFKFB2 coherently supports a β-cell identity via insulin production and β-cell exocytosis/metabolic regulation; HDAC9 is compatible and adds transcriptional context. The top-ranked “proliferative β-cell” lacks hallmark proliferation markers (e.g., MKI67, TOP2A) and instead shows ER stress genes (DDIT3, HSPA5), which are not definitive for proliferation, so it is less specific. “…	SYT4, INS, PFKFB2, HDAC9														14	macrophage	high	The cluster shows a strong macrophage program with multiple lineage-defining and functional markers (LYZ, CD14, CD68, CSF1R, FCGR1A, TYROBP, C1QA/C1QB/C1QC, MSR1, CX3CR1, HLA-DRA), consistent with differentiated tissue macrophages and widely validated in single-cell studies and flow phenotyping (e.g., CD14, CD68, CD64/FCGR1A, CSF1R). B cell and plasma cell candidates rely mainly on immunoglobulin…	CD14, CD68, CSF1R, FCGR1A, CX3CR1		14	pancreatic stellate cell	high	The cluster expresses a fibroblast-like ECM program (Col1a1/Col1a2/Col3a1, Dcn, Sparc) with PDGFRa/b and Thy1, and uniquely includes stellate-defining markers Rbp1 (vitamin A metabolism) and Des (desmin), together with Acta2—an organ-specific signature consistent with pancreatic stellate cells. Mesenchymal cell and fibroblast are too generic and lack stellate-specific markers; activated pancreati…	Rbp1, Des, Pdgfrb, Col1a1		14	natural killer cell	high	Gzmm, Gzmk, and Ccl5 overlap indicate a cytotoxic granzyme/chemokine program characteristic of NK cells in rat lung, with no conflicting negative markers; this coherently matches known NK lineage-defining and in vivo functional signatures. No other candidates were provided, so none required rejection.	Gzmm, Ccl5, Gzmk
15	smooth muscle cell	high	The cluster expresses a robust contractile smooth muscle program with multiple lineage-defining markers (MYH11, ACTA2, TAGLN, CNN1) plus CALD1, ACTG2, SMTN, and MYLK, best matching smooth muscle cell. The blood vessel smooth muscle cell option is plausible but its overlap omits several core SMC cytoskeletal/contractile genes present here and includes less defining genes (e.g., EGFL6, EBF1), makin…	MYH11, ACTA2, TAGLN, CNN1		15	pancreatic ductal cell	high	The overlap includes canonical pancreatic ductal features—keratins (KRT19, KRT7, KRT8, KRT18), epithelial junctions (CLDN4, CLDN1), apical mucin (MUC1), transcriptional regulators (SOX9, HES1, ONECUT2), epithelial adhesion (CDH1), and CD24 alongside SLC4A4—consistent with mature ductal identity validated in single-cell studies and flow cytometry. Candidate 2 (duct epithelial cell) is less specifi…	KRT19, SOX9, MUC1, CLDN4, CD24														15	classical monocyte	high	FCN1 together with S100A8/S100A9 coherently defines classical/inflammatory monocytes in vivo and matches scRNA/flow phenotypes, making this more specific than the generic 'monocyte'; 'macrophage' was rejected because strong FCN1 and S100A8/S100A9 indicate undifferentiated monocytes rather than MRC1/CD163-high tissue macrophages; 'neutrophil' was rejected due to negative marker conflict (CD14 over…	FCN1, S100A8, S100A9		15	mature β-cell	high	The cluster co-expresses core β-cell lineage and maturity determinants (Pdx1, Nkx6-1, Mafa) together with β-cell functional genes (Slc2a2, G6pc2, Pcsk1, Ins1/Ins2), a combination that is both necessary and sufficient for mature β-cell identity in vivo. Rank 2 (type B pancreatic cell) includes β markers but also Gad1/neuronal features and is less specific; Rank 3 (extreme-like β-cell population) l…	Pdx1, Nkx6-1, Mafa, Slc2a2, G6pc2		15	pulmonary alveolar type 2 cell	high	The cluster鈥檚 overlap shows a coordinated surfactant program (Sftpb, Sftpa1, Sftpd) with epithelial EpCAM, which is lineage-defining for alveolar type 2 cells and matches flow-sorted EpCAM+ AT2 and single-cell signatures; the 鈥榩ulmonary alveolar epithelial cell鈥?candidate is too generic and only overlaps Sftpb, lacking broader surfactant coherence; 鈥榚pithelial cell鈥?is nonspecific and includes Sc…	Sftpb, Sftpa1, Sftpd, Epcam
16	mast cell	high	The cluster shows a quintessential mast cell program with simultaneous expression of tryptases (TPSAB1, TPSB2), CPA3, high‑affinity IgE receptor components (FCER1A, MS4A2), KIT, HDC, HPGDS, and GATA2—an in vivo-defining signature and classic flow cytometry phenotype (KIT+, FcεRI+). Other candidates lack this coherent combination: the mixed label “Mast cells and B cell” has only TPSB2 and is non-s…	TPSAB1, TPSB2, CPA3, FCER1A		16	macrophage	high	Macrophage is best supported because the overlap includes lineage-defining macrophage markers (CD68, CD14, AIF1) together with complement C1QA/B/C, CD86, CD163, and CXCL8, a coherent myeloid/macrophage program validated by flow and single-cell studies; Rank 1 leukocyte is too generic and lacks macrophage specificity; Rank 3 professional antigen presenting cell has only CD86/CD74 and could reflect…	CD68, CD14, C1QA, AIF1														16	macrophage	high	The cluster shows a robust macrophage signature with multiple lineage-defining markers (e.g., MRC1, CD163, LYZ, ITGAM, MSR1, SIGLEC1, TLR2, IL1B) that collectively indicate differentiated macrophages commonly validated in single-cell studies and flow cytometry. Fibroblast and fibroblast-like candidates overlap mainly with generic ECM genes (COL1A1/COL1A2/COL3A1, FN1) that are not lineage-specific…	MRC1, CD163, LYZ, ITGAM, MSR1		16	pancreatic PP cell	high	pancreatic PP cell is most appropriate because the overlap includes Ppy (the lineage-defining PP hormone) and Arx (a core TF for PP/alpha lineage) together with the cell-surface marker Tspan8, a combination sufficient and specific for PP identity in vivo and consistent with single-cell studies. The closely ranked PP cell lacks Tspan8, reducing specificity. Pancreatic polypeptide-lineage beta cell…	Ppy, Arx, Tspan8		16	alveolar macrophage	high	Alveolar macrophage best fits a normal rat lung cluster because multiple overlapping markers (Cd68, Sirpa, Ctsd, Naaa) coherently indicate resident macrophages with lysosomal and lipid-handling functions typical in alveoli; no negative-marker conflicts. CD8-positive T cell is rejected because its only overlap, Stmn1, is a proliferation/cytoskeletal gene and lacks canonical T-cell markers (CD3, CD…	Ctsd, Naaa, Sirpa, Cd68
17	goblet cell	high	MUC5B, TFF3, SPDEF, and AGR2 together define the mucin-producing goblet program in airway epithelium validated in scRNA-seq; this coherent, lineage-defining set is more specific than the broader 'secretory cell' list and stronger than the single-marker 'serous secreting cell'. 'Immature neutrophil' is incompatible with epithelial goblet markers, and other candidates provide only sparse overlaps (…	MUC5B, TFF3, SPDEF, AGR2		17	mast cell	high	Mast cell is most appropriate because overlapping markers TPSB2, TPSAB1, CPA3, and KIT are hallmark mast-cell granule enzymes and a defining surface receptor consistent with flow cytometry and scRNA-seq signatures. Leukocyte is too generic (PTPRC, TYROBP, LAPTM5) and lacks mast-cell–specific proteases. B cell was rejected because KIT is atypical for mature B cells and key B-cell markers are absen…	TPSB2, TPSAB1, CPA3, KIT														17	mesenchymal glioblastoma multiforme	high	The overlap displays a canonical GBM mesenchymal program with CHI3L1, CD44, FN1 plus hypoxia/angiogenesis signals (VEGFA, ANGPTL4, ADM) and stress/metallothioneins (MT1E/MT2A, NDRG1), coherently matching mesenchymal glioblastoma multiforme. The generic 'mesenchymal cell' and the vague 'mesenchymal-like' lack the GBM-specific hypoxia/metallothionein profile and are less precise. 'astrocyte' hinges…	CD44, CHI3L1, FN1, VEGFA		17	B cell	high	Cd79a/Cd79b (BCR components) together with Cd19 and Ms4a1 (CD20) are canonical, lineage-defining B-cell markers whose combined presence is sufficient to specify B cells over other leukocytes; the 'leukocyte' candidate overlaps only broad immune genes (Ptprc, H2-Ab1, Cd74, Cd52, Rac2) lacking lineage specificity; 'non-activated B cell' provides only Ms4a1 and Cd19 (state-level, less definitive wit…	Cd79a, Cd79b, Cd19, Ms4a1		17	CD8-positive T cell	high	Cd8a is a lineage-defining, flow-cytometry surface marker for CD8 T cells and overlaps the cluster, making CD8-positive T cell the most biologically coherent annotation; Stmn1 supports a proliferative CD8 T population. The natural killer cell candidate is rejected because its overlapping markers (Gzmk, Gzmm, Ccl5) reflect a shared cytotoxic program also found in activated CD8 T cells but lack def…	Stmn1, Cd8a
18	B cell	high	The cluster expresses core B-cell receptor components and cell-surface markers (CD79A, CD79B, MS4A1) together with immunoglobulin constant regions (IGHM, IGHG1, IGKC), which most coherently define a B cell; presence of JCHAIN does not override the strong MS4A1/CD79 signal and can reflect activated B subsets rather than full plasma cells. 'plasma cell' and 'antibody secreting cell' were rejected b…	CD79A, MS4A1, CD79B, IGHM																				18	glioblastoma stem cell	high	The overlap shows a stem-like glioma program (SOX2, OLIG2, CD24, EGFR, EZH2) characteristic of glioblastoma stem cells; candidate 1 is rejected because its negative marker TNR overlaps, and candidate 6 is rejected due to CDKN2A negative overlap; candidate 2 is too generic and lacks clear stem-cell specificity; candidates 3 and 4 capture progenitor features but miss broader neoplastic hallmarks (e…	SOX2, OLIG2, CD24, EGFR, EZH2		18	regulatory T cell	high	Foxp3 with Cd4 and Ctla4 is a lineage-defining, sufficient signature for mouse Tregs and discriminates them from conventional or anergic CD4 T cells; this combination matches validated single-cell and surface phenotypes. Anergic CD4 T cell was rejected because the presence of Foxp3 supports true Treg identity over anergy despite PD-1/CTLA4; generic T cell lacks specificity; gamma-delta T cell lac…	Foxp3, Ctla4, Cd4		18	neutrophil	medium	neutrophil is most appropriate because the cluster overlaps on G0s2, a gene enriched in and functionally linked to neutrophils' survival and observed in single-cell profiles of lung granulocytes; there are no conflicting negative markers and the lung context supports resident neutrophils in normal tissue. No other ranked candidates were provided to consider or reject.	G0s2
19	endothelial cell of lymphatic vessel	high	The cluster co-expresses definitive lymphatic endothelial markers PDPN, PROX1, LYVE1, FLT4 and CCL21, a canonical LEC chemokine, consistent with validated flow-cytometry and single-cell signatures; generic endothelial candidates lack this coordinated LEC program, 'lymphatic vessel' is anatomical and supported by fewer markers, intravascular macrophage explains LYVE1 but not PROX1/PDPN/FLT4, immun…	PDPN, PROX1, LYVE1, FLT4, CCL21																				19	macrophage	high	Macrophage is most appropriate because the overlap includes a broad, coherent macrophage signature—complement genes (C1QA/C1QB/C1QC), scavenger receptors (MSR1, STAB1), CD163, AIF1, TYROBP, MS4A4A, RNASET2, APOC1, and CD14—matching well-established tissue/monocyte-derived macrophage identities and flow cytometry phenotypes (CD14, CD163, FCGR1A) validated across single-cell studies. Higher-ranked …	C1QA, C1QB, C1QC, CD163, MSR1		19	smooth muscle cell	high	Myh11 together with Acta2 in the overlap provides a lineage-defining contractile signature that is necessary and sufficient for smooth muscle identity in vivo, discriminating it from pericytes and stellate/fibroblast lineages. Quiescent stellate cell and pericyte (and pancreatic stellate/activated stellate/pancreatic fibroblast/fibroblast) are rejected because their hallmark perivascular markers …	Acta2, Myh11		19	fibroblast	high	Fibroblast is supported by overlap with Dcn and Fn1, canonical extracellular matrix genes widely used to identify lung fibroblasts in single-cell studies; these markers reflect mesenchymal ECM production typical of fibroblasts. The broader 'mesenchymal cell' candidate relies only on Col3a1 and lacks fibroblast-defining markers, making it less specific. 'Endothelial cell' is rejected because Eln i…	Dcn, Fn1
20	cycling alveolar macrophage	medium	The overlap (MKI67, TOP2A, TYMS, NUSAP1) reflects a robust proliferative program in macrophages, and this most specific tissue-resident macrophage label aligns best with a cycling alveolar macrophage subset; “cycling macrophage” is less specific and lacks TYMS/NUSAP1, reducing coherence; “cycling pulmonary alveolar type 2 cell” would require AT2 surfactant genes (e.g., SFTPA/SFTPC), which are not…	MKI67, TOP2A, TYMS, NUSAP1																				20	radial glial cell	high	GFAP together with HOPX, PTPRZ1, SLC1A3 and CLU is a canonical radial glia signature (GFAP+GLAST with HOPX and PTPRZ1 marking radial glial progenitors), making 'radial glial cell' the most coherent lineage identity. 'mature astrocyte' (rank 5) lacks the progenitor-defining HOPX/PTPRZ1 and fits astrocytes rather than radial glia; 'human neural stem/progenitor cells' (rank 3) does not include PTPRZ…	GFAP, PTPRZ1, HOPX, SLC1A3		20	macrophage	high	The overlap includes core macrophage lineage-defining markers Csf1r, Adgre1 (F4/80), Mpeg1, Cd68 together with Itgam and Cx3cr1, a combination that is necessary and sufficient to specify macrophages over other myeloid cells and matches established flow cytometry and single-cell signatures in pancreas. Islet macrophage (rank 4) lists only generic macrophage genes without islet-specific discriminat…	Csf1r, Adgre1, Mpeg1, Itgam		20	neutrophil	high	S100a8 and S100a9 are canonical calgranulin markers that robustly define neutrophils across species and single-cell studies, and G0s2 commonly marks activated granulocytes, coherently matching a neutrophil lineage and phenotype; the alveolar macrophage candidate has only a single overlapping marker (Clec4d) which is not sufficiently specific for alveolar macrophages and lacks hallmark macrophage …	S100a9, S100a8, G0s2
21	alveolar macrophage	high	The cluster shows hallmark alveolar macrophage identity with strong overlap of lineage-defining and flow-cytometry surface markers (PPARG, MARCO, MRC1, ITGAX, SIGLEC1 plus HLA class II, C1QA, FCGR1A), matching validated single-cell signatures; alternatives were rejected because 'macrophage' is generic and lacks alveolar-defining PPARG/VSIG4, 'tissue-resident alveolar macrophage' has a sparser ove…	PPARG, MARCO, MRC1, ITGAX, SIGLEC1																				21	glioblastoma stem cell	low	The cluster’s overlap includes canonical glioblastoma stem cell markers (SOX2, OLIG2, PTPRZ1, THY1, ADGRG1, EZH2, POU3F2) that together define a malignant stem-like state in glioma and match known single-cell and flow cytometry phenotypes, with no conflicting negative markers. Rank 1 neoplastic cell is too generic despite sharing glioma-associated markers (e.g., MDM2, CDK4, OLIG2, PTPRZ1), lackin…	SOX2, PTPRZ1, THY1, ADGRG1, OLIG2		21	pancreatic A cell	high	The cluster shows a definitive α-cell signature with overlapping markers Gcg, Arx, Irx2, Pcsk2, and Mafb, which together are both necessary and sufficient for α-cell identity and align with established single-cell and flow cytometry phenotypes; additional α-associated markers (Ace2, Slc38a5) further support this. The α-cell candidate (rank 5) is essentially synonymous but has fewer lineage-defini…	Gcg, Arx, Irx2, Pcsk2, Mafb		21	pulmonary alveolar type 1 cell	high	The cluster overlaps with Ager, Pdpn, and Aqp5, a canonical AT1 signature; PDPN and AGER are cell-surface markers used in flow cytometry, and their combined expression is validated in single-cell studies, making pulmonary alveolar type 1 cell the most coherent choice. The generic epithelial cell candidate lacks AT1-defining Ager/Pdpn and is less specific. Endothelial cell relies only on Cav1, whi…	Ager, Aqp5, Pdpn
22	pulmonary alveolar type 2 cell	high	Cluster 22 shows a canonical AT2 signature with multiple surfactant genes (SFTPC, SFTPB, SFTPA1/2/D), lipid handling (ABCA3, LPCAT1), NKX2-1, and transporters (SLC34A2, NAPSA), most specifically aligning with pulmonary alveolar type 2 cell. The iPSC-derived AT2 (rank 1) represents an in vitro counterpart despite similar markers; pulmonary alveolar epithelial cell (rank 2) is less specific and mix…	SFTPC, SFTPB, ABCA3, SLC34A2																				22	newly formed oligodendrocyte	medium	Selected because the overlap includes OLIG1/OLIG2 and SOX10 (core oligodendroglial transcription factors) plus APOD, a hallmark of newly formed oligodendrocytes, with residual PDGFRA consistent with early post-OPC transition—together coherently defining a differentiating oligodendrocyte in vivo. Oligodendrocyte precursor-like cell was rejected because dominant OPC surface markers (PDGFRA, CSPG4, …	APOD, SOX10, OLIG2, OLIG1		22	dendritic cell	high	The overlap includes DC-defining markers Itgax (CD11c) and Ly75 (DEC205) with Ccr7 indicating migratory/activated DC, a combination that is both necessary and sufficient for dendritic cell identity and aligns with validated flow phenotypes and single-cell signatures. 'Leukocyte' is too broad and lacks lineage specificity. 'Macrophage' options rely on Cd68/Mpeg1/Lgals3/Lgmn/Ly86, which are general…	Itgax, Ly75, Ccr7		22	bronchioalveolar stem cell	medium	Scgb1a1 is a canonical Club/secretoglobin marker consistent with bronchioalveolar stem cells that exhibit Club identity in vivo, and no overlapping negative markers conflict; thus this best matches a tissue-resident lineage in normal rat lung. The 'adult lung spheroid cells' option is a culture-derived in vitro phenotype rather than a defined in vivo cell type, so despite sharing Scgb1a1 it is le…	Scgb1a1
23	basal cell	high	The cluster’s overlap shows a canonical basal epithelial program defined by TP63, NGFR, ITGB4, KRT15, KRT17 and EPCAM, which together capture lineage-defining transcriptional identity and well-established flow cytometry phenotypes (NGFR/p75, ITGB4/CD104, EPCAM). ‘Respiratory basal cell’ introduces lung-specific NKX2-1/PDPN signatures; PDPN is atypical for basal cells and may reflect admixture, ma…	NGFR, TP63, ITGB4, KRT15, EPCAM																				23	cDC2	high	cDC2 is most appropriate because the overlapping markers FCER1A, CLEC10A, and CD1C are canonical CD1C+ cDC2 cell-surface and transcriptional signatures validated by flow cytometry and single-cell studies, defining this lineage in vivo. The top candidate 'Migratory conventional dendritic cell type 2 / monocyte-derived dendritic cell' is ambiguous and lacks clear migratory (e.g., CCR7) or moDC-spec…	FCER1A, CLEC10A, CD1C		23	macrophage	high	The overlap includes core macrophage lineage markers (Csf1r, Adgre1/F4/80, Cd68, Mpeg1) plus complement genes (C1qa/C1qb) and Mrc1 (CD206), a combination sufficient and specific for macrophage identity and consistent with known flow cytometry phenotypes and single-cell signatures; this discriminates macrophages from closely related dendritic/myeloid populations. Inflammatory macrophage was not se…	Csf1r, Adgre1, C1qa, Mpeg1
																								24	microglia/macrophage	high	The cluster shows hallmark microglial identity with strong overlap for P2RY12, TMEM119, and CX3CR1 alongside macrophage-lineage markers (CD68, ITGAM), matching well-established microglia phenotypes in vivo and flow cytometry. The microglia-derived tumor-associated macrophage candidate, while containing microglial markers (P2RY12, TMEM119, SALL1) and immunosuppressive features (ENTPD1, CD163), pre…	P2RY12, TMEM119, CX3CR1, ITGAM		24	PP cell	medium	PP cell is best supported because Ppy is the lineage-defining hormone for pancreatic polypeptide endocrine cells and Arx is consistent with endocrine identity, providing a sufficient, specific signature distinguishing PP cells from other islet types. The 'pancreatic polypeptide-lineage beta cell' candidate lacks essential beta-cell markers (Ins1/Ins2, Pdx1, Slc2a2) and includes Ppy, making the be…	Ppy, Arx
																								25	cytotoxic T cell	high	The cluster’s overlap includes TCR components (CD3E/CD3D/CD3G), CD8 co-receptors (CD8A/CD8B), and hallmark cytotoxic effector molecules (GZMA/GZMK/GZMB, IFNG, XCL1), which coherently define cytotoxic CD8 T cells and match well-established flow cytometry and single-cell signatures; other candidates were rejected because: cycling glial cell shows only cell-cycle genes without glial or T-lineage ide…	CD3E, CD8A, GZMB, IFNG		25	pancreatic stellate cell	high	The cluster shows a canonical pancreatic stellate phenotype with lineage-defining quiescent PSC markers Des and Rbp1 alongside fibroblast ECM genes (Col1a1/Col1a2/Col3a1) and PDGFR signaling (Pdgfra/Pdgfrb), coherently matching in vivo PSC identity in mouse pancreas. Activated pancreatic stellate cell was rejected because the overlap lacks Rbp1 (a core quiescent PSC hallmark) and the mixed presen…	Des, Rbp1, Pdgfrb, Col1a1
																								26	pericyte	high	Pericyte best fits because the cluster shows a canonical perivascular program with PDGFRB, RGS5, NOTCH3, CSPG4, MCAM, CD248, and ACTA2, matching lineage-defining and flow cytometry phenotypes validated in single-cell studies; fibroblast and fibroblast-like mainly contribute collagen/ECM genes without pericyte-defining receptors; mural cell is an umbrella term and less specific given the strong pe…	PDGFRB, RGS5, NOTCH3, CSPG4		26	mature β-cell	high	The cluster shows a canonical mature β-cell transcriptional signature combining lineage-defining and maturation markers (Ins2, Iapp, Pcsk1, G6pc2, Nkx6-1, Slc2a2, Ucn3, Prlr, Rfx6), which is necessary and sufficient to distinguish β-cells from other pancreatic cell types; the “mature β-cell” candidate most coherently matches this set, emphasizing Ucn3, G6pc2, Slc2a2, Nkx6-1, and Pcsk1 that are va…	Ins2, G6pc2, Nkx6-1, Ucn3, Slc2a2
																								27	oligodendrocyte	high	The cluster shows a mature myelin/oligodendrocyte program with strong overlap of MAG, MBP, PLP1, CLDN11, OPALIN, ERMN, UGT8, CNP, FA2H alongside lineage TFs SOX10/OLIG1—features specific to differentiated oligodendrocytes and validated in single-cell studies and surface/myelin phenotyping. OPC was rejected because classic OPC markers (e.g., PDGFRA/CSPG4) are absent and several mature markers (OPA…	MBP, PLP1, MAG, CLDN11		27	T-helper 2 cell	medium	Gata3 together with Cd4 provides a lineage-defining signature for Th2 cells in vivo, matching a CD4 T-helper phenotype and a master transcriptional regulator; this is more specific than other options. Effector memory T cell markers (Cxcr6, Id2) are not necessary or sufficient for effector memory identity and are broadly expressed in tissue-resident/activated T cells. FOXP3+ regulatory T cell and …	Cd4, Gata3
																								28	endothelial cell	high	The cluster shows a canonical endothelial transcriptional program with broad overlap of lineage-defining vascular markers (CLDN5, PECAM1, VWF, CDH5, KDR, TIE1, CD34, ENG), which best matches the generic endothelial cell identity. 'Tumor endothelial cells' and 'tumor core endothelial cell type I: Co1' require tumor-specific angiogenic context and show more restricted/angiogenic signatures (e.g., N…	CLDN5, PECAM1, VWF, CDH5, KDR		28	type B pancreatic cell	high	The overlap includes core β-cell identity markers Ins2, G6pc2, Iapp, Pcsk1, and the β-lineage TF Rfx6, a combination that is both necessary and sufficient to distinguish β cells from other islet types; additional state markers (Aldh1a3, Gast) do not undermine the strong lineage signal. The mature β-cell candidate lacks highly specific markers (Iapp, Rfx6) and includes non–lineage-defining genes (…	Ins2, G6pc2, Iapp, Rfx6
																								29	neuron	high	STMN2 and MAP2 are canonical neuron-defining markers frequently used in single-cell studies, and together with CD24 they coherently indicate a neuronal identity, making the 'neuron' candidate the best fit. 'Neural progenitor cell' is less appropriate because progenitors (e.g., SOX4+) typically do not show strong STMN2/MAP2 expression. Malignant/stem labels (proneural glioma stem cell, glioblastom…	STMN2, MAP2, CD24		29	T cell	high	Core T-lineage markers Cd3d and Cd3g plus Il7r (CD127) collectively provide necessary and sufficient evidence of a T-cell identity and match established flow-cytometry and scRNA-seq signatures; in contrast, natural killer cell (Nkg7) and cytotoxic T cell (Klrk1) each rely on single granule/activation markers shared with multiple cytotoxic lymphocytes, effector memory T cells (Cxcr6, Id2) lack T-l…	Cd3d, Cd3g, Il7r
																								30	B cell	high	B cell is most appropriate because overlap with JCHAIN, IGKC, MZB1, and IGHM coherently reflects immunoglobulin production and secretory B-lineage/plasmablast identity validated in single-cell studies and flow phenotypes; dendritic cell candidates (including cDC2 variants and monocyte-derived DC) rely mainly on FCER1A ± HLA-DQ and lack immunoglobulin genes; exhausted T cell is supported only by I…	JCHAIN, IGKC, MZB1, IGHM		30	duct epithelial cell	high	The cluster shows strong, lineage-defining ductal epithelium features with Car2, Hnf1b, Sox9, and Krt19 alongside epithelial markers (Muc1, Cdh1, Cd24a, Cd44, Prom1), which together are sufficient and specific for pancreatic duct identity in vivo. The generic 'epithelial cell' and 'epithelial cell of pancreas' lack duct-specific discrimination; 'pancreatic ductal cell' must be rejected because it…	Car2, Hnf1b, Sox9, Krt19
																								31	microglial cell	high	microglial cell best fits because the overlap includes multiple canonical microglial lineage markers (TMEM119, TREM2, GPR34, C1QA) that define resident microglia in vivo; by contrast, activated microglia is supported mainly by activation markers (IL1B, CD86, CCL4) but lacks core lineage genes; inflammatory macrophage and M1/TAM labels are generic or macrophage-skewed (e.g., CD74, CCL2) and do not…	TMEM119, TREM2, GPR34, C1QA		31	B cell	high	Cd79a/Cd79b (BCR complex), Ms4a1 (CD20), and Cd19 are core, lineage-defining B cell markers that together are sufficient to specify B cells and match established flow cytometry and single-cell signatures; the top-ranked 'Mki67-positive beta cell' overlaps only proliferative genes (Mki67, Top2a, Cdk1, Mcm2, Pcna, Cenpp) without beta-cell–defining markers, so it reflects cell-cycle state rather tha…	Cd79a, Cd79b, Ms4a1, Cd19
																								32	Unknown	low	MIF is a broadly expressed cytokine and not a lineage-defining or canonical surface marker for myeloid-derived suppressor cells; without hallmark MDSC features such as S100A8/S100A9, ITGAM (CD11b), CD14, ARG1, or LILRB1/2, the annotation lacks biological support. The sole candidate 'myeloid suppressor cell' was rejected because its only overlapping positive marker (MIF) is non-specific and does n…			32	plasma cell	high	Plasma cell is most appropriate because the overlap includes lineage-defining and sufficient markers for antibody-secreting plasma cells—Sdc1 (CD138) surface phenotype with Jchain and Irf4 transcriptional program—matching established flow cytometry and single-cell signatures. B cell is rejected because Cd79a/b mark naive/mature BCR+ B cells and are typically downregulated in plasma cells, lacking…	Jchain, Sdc1, Irf4
																								33	vascular cell	medium	Vascular cell is supported by overlap with PECAM1 (CD31), a canonical endothelial surface marker, plus IFITM1, coherently indicating endothelial/vascular identity. Malignant cell is rejected due to overlap with its negative marker PTPRC, and B cell is rejected due to overlap with its negative marker CD3D. Peripheral EC type I [Pe1] lacks overlap with core endothelial markers like PECAM1 here, mak…	PECAM1, IFITM1		33	CD103-positive dendritic cell	high	Xcr1 together with Itgae (CD103) are lineage-defining for mouse cDC1 in non-lymphoid tissues like pancreas, providing both necessity and sufficiency for this subset and matching established flow phenotypes and scRNA-seq signatures. The generic 'leukocyte' candidate is non-specific. The broader 'dendritic cell' candidate (Clec9a/Itgax/Ly75/Ccr7) is consistent with DCs but less specific than the CD…	Xcr1, Itgae
																								34	pericyte	medium	Pericyte best fits because the cluster strongly co-expresses hallmark mural/pericyte markers (PDGFRB, RGS5, NOTCH3, ACTA2, CSPG4, MCAM, ABCC9/ATP1A2) that define pericyte identity and are widely used as flow-cytometry and scRNA-seq signatures. Fibroblast and fibroblast-like options mainly capture ECM genes (COL1A1/COL1A2/COL3A1, DCN, FN1, THY1) and lack pericyte-defining markers. Mural cell and C…	PDGFRB, RGS5, NOTCH3, CSPG4		34	acinar cell	high	The overlap contains the mature acinar core program (Cpa1, Pnlip, Prss1/Prss2, Try genes, Ctrb1, Amy2a5, Cela1) plus the acinar-defining TF Rbpjl, a combination that is necessary and sufficient for pancreatic acinar identity and clearly separates this cluster from ductal, endocrine, or developmental states; no negative-marker conflicts are present. “Pancreatic acinar cell” is biologically similar…	Rbpjl, Cpa1, Pnlip, Prss1
																														35	type B pancreatic cell	high	This cluster co-expresses core β-cell identity markers (Ins1, Ins2, Pcsk1, Iapp) alongside Prlr and the proliferation marker Mki67, which together are sufficient and specific for a proliferative β-cell population; hence “type B pancreatic cell” best captures both lineage and functional identity. “Mki67-positive beta cell” lacks overlapping insulin/β-lineage markers, so it is not sufficient for β-…	Ins1, Ins2, Pcsk1, Iapp
																														36	endothelial cell	high	The cluster shows a robust pan-endothelial program with multiple lineage-defining and flow-cytometry–validated markers (Pecam1/CD31, Cdh5/VE-cadherin, Kdr/VEGFR2, Cd34, Vwf, Flt1, Tie1, Eng, Egfl7), which together are necessary and sufficient for endothelial identity and discriminate it from fibroblasts, stellate cells, or immune lineages. The “pancreatic islet capillary endothelial cell” candida…	Pecam1, Cdh5, Kdr, Cd34
																														37	endothelial cell	high	This cluster shows a canonical endothelial program with multiple lineage-defining surface and signaling markers (Pecam1, Cdh5, Kdr, Flt1, Tie1, Vwf, Cd34, Eng, Egfl7, Erg), which is necessary and sufficient for endothelial identity and fits pancreatic vasculature; 'pancreatic islet capillary endothelial cell' was rejected because its overlap (Pecam1, Emcn) lacks breadth and specificity to uniquel…	Pecam1, Cdh5, Kdr, Flt1
																														38	pancreatic stellate cell	medium	Pancreatic stellate cell is supported by the overlap of lineage-defining GFAP and RBP1 together with fibroblast markers (S100a4/Vim), a combination validated for quiescent pancreatic stellate cells and sufficient to distinguish them from other stromal types. Schwann cell was rejected despite strong glial markers (Sox10/Plp1/Ptprz1) because these define neural crest glia and do not align with the …	Gfap, Rbp1, S100a4
																														39	endothelial cell	high	The cluster strongly matches a canonical endothelial program with lineage-defining and flow-cytometry validated markers (Kdr/VEGFR2, Cdh5/VE-cadherin, Pecam1/CD31, Erg, plus Tie1, Eng, Egfl7, Plvap, F8), which are necessary and jointly sufficient for endothelial identity in pancreas. Other candidates were rejected: centroacinar/terminal duct and stem-like (Hes1-only; Notch/cell-state and lacks du…	Kdr, Cdh5, Pecam1, Erg
																														40	T cell	high	The T cell candidate is supported by core lineage-defining markers Cd3e, Cd3d, and Cd3g, with Il7r and both Cd4 and Cd8a indicating a mixed T-cell population; this combination is necessary and largely sufficient to specify T lymphocytes and is consistent with validated single-cell and flow phenotypes. The top-ranked Mki67-positive beta cell relies solely on proliferation markers (Mki67, Top2a, Cd…	Cd3e, Cd3d, Cd3g, Il7r
																														41	T cell	high	CD3 complex genes (Cd3e, Cd3d, Cd3g) together with Il7r provide a lineage-defining TCR–CD3 signature and classic flow cytometry phenotype (CD3+, CD127+), which is sufficient and necessary for T cell identity in vivo; B cell candidates (Ms4a1, Cd79a, Cd79b, Cd19) lack CD3 and are incompatible with a T-lineage signature; the 'leukocyte' option is generic (Ptprc, Cd52) without TCR/CD3 specificity; T…	Cd3e, Cd3d, Cd3g
																														42	pancreatic A cell	high	Arx and Gcg are core, lineage-defining alpha-cell markers that are necessary and sufficient for pancreatic A cell identity, with Slc38a5 further supporting established alpha signatures in mouse islets; immature β-cell was rejected because Pyy and Rbp4 are not β-lineage markers and lack Ins1/Ins2 or Pdx1; T cell was rejected because Cd3g/Cd3d/Cd3e, while T-cell specific, do not explain endocrine h…	Arx, Gcg, Slc38a5

## Sheet: S2
Annotation and scoring results of six annotation frameworks across five scRNA-seq datasets
dataset:	scRNA-seq datasets.
cluster:	Cluster ID after Seurat preprocessing.
ground_truth:	Cell type names annotated by the authors or experts.
framework:	The annotation frameworks.
annotation:	Cell-type annotation results based on the framework.
score:	assigned as 1, 0.5, or 0 when the annotation is fully matched, partially matched, or not matched, respectively.
dataset	cluster	ground_truth	framework	annotation	score
Human Lung	0	T cell lineage	ScType+ACT	T cell	1
Human Lung	0	T cell lineage	CASSIA	CD8+ cytotoxic T lymphocytes	1
Human Lung	0	T cell lineage	ScType+CellMarker 2.0	Naive CD8+ T cell	0.5
Human Lung	0	T cell lineage	ScType+CMA	CD8-positive, alpha-beta cytotoxic T cell	1
Human Lung	0	T cell lineage	ScType+scMarkerAgent	CD8-positive, alpha-beta cytotoxic T cell	1
Human Lung	0	T cell lineage	ScType+scMarkerAgent+LLM	CD8-positive, alpha-beta cytotoxic T cell	1
Human Lung	1	AT2	ScType+ACT	Type II pneumocyte	1
Human Lung	1	AT2	CASSIA	Alveolar Type II (AT2) epithelial cells	1
Human Lung	1	AT2	ScType+CellMarker 2.0	Lung epithelial cell	0.5
Human Lung	1	AT2	ScType+CMA	epithelial cell of alveolus of lung	0.5
Human Lung	1	AT2	ScType+scMarkerAgent	induced pluripotent stem cell-derived alveolar epithelial type 2 cell	1
Human Lung	1	AT2	ScType+scMarkerAgent+LLM	pulmonary alveolar type 2 cell	1
Human Lung	2	Secretory	ScType+ACT	Stratified epithelial cell	0
Human Lung	2	Secretory	CASSIA	Mucus-secreting luminal epithelial cell (goblet/secretory-like) of the airway/respiratory mucosa.	1
Human Lung	2	Secretory	ScType+CellMarker 2.0	Secretory cell	1
Human Lung	2	Secretory	ScType+CMA	goblet cell	1
Human Lung	2	Secretory	ScType+scMarkerAgent	secretory cell	1
Human Lung	2	Secretory	ScType+scMarkerAgent+LLM	goblet cell	1
Human Lung	3	Basal	ScType+ACT	Basal cell	1
Human Lung	3	Basal	CASSIA	Airway basal epithelial cell (proximal lung airway basal progenitor)	1
Human Lung	3	Basal	ScType+CellMarker 2.0	Basal cell	1
Human Lung	3	Basal	ScType+CMA	respiratory basal cell	1
Human Lung	3	Basal	ScType+scMarkerAgent	respiratory basal cell	1
Human Lung	3	Basal	ScType+scMarkerAgent+LLM	respiratory basal cell	1
Human Lung	4	EC capillary	ScType+ACT	Endothelial cell of vascular tree	0.5
Human Lung	4	EC capillary	CASSIA	Pulmonary alveolar general capillary endothelial cell (gCap)	0.5
Human Lung	4	EC capillary	ScType+CellMarker 2.0	Pan-endothelial cell	0.5
Human Lung	4	EC capillary	ScType+CMA	endothelial cell	0.5
Human Lung	4	EC capillary	ScType+scMarkerAgent	endothelial cell	0.5
Human Lung	4	EC capillary	ScType+scMarkerAgent+LLM	blood vessel endothelial cell	0.5
Human Lung	5	Monocytes	ScType+ACT	CD14-positive monocyte	1
Human Lung	5	Monocytes	CASSIA	Inflammatory monocytes / monocyte-derived macrophages (CD14+ classical mononuclear phagocytes)	1
Human Lung	5	Monocytes	ScType+CellMarker 2.0	Monocyte	1
Human Lung	5	Monocytes	ScType+CMA	classical monocyte	1
Human Lung	5	Monocytes	ScType+scMarkerAgent	monocyte	1
Human Lung	5	Monocytes	ScType+scMarkerAgent+LLM	monocyte	1
Human Lung	6	Multiciliated lineage	ScType+ACT	Lung ciliated cell	1
Human Lung	6	Multiciliated lineage	CASSIA	Motile ciliated epithelial cell (multiciliated airway epithelial cell)	1
Human Lung	6	Multiciliated lineage	ScType+CellMarker 2.0	Ciliated cell	1
Human Lung	6	Multiciliated lineage	ScType+CMA	ciliated cell	1
Human Lung	6	Multiciliated lineage	ScType+scMarkerAgent	ciliated cell	1
Human Lung	6	Multiciliated lineage	ScType+scMarkerAgent+LLM	ciliated cell	1
Human Lung	7	Macrophages	ScType+ACT	Macrophage	1
Human Lung	7	Macrophages	CASSIA	Macrophages (tissue-resident lung macrophages)	1
Human Lung	7	Macrophages	ScType+CellMarker 2.0	Macrophage	1
Human Lung	7	Macrophages	ScType+CMA	mononuclear phagocyte	0.5
Human Lung	7	Macrophages	ScType+scMarkerAgent	alveolar macrophage	1
Human Lung	7	Macrophages	ScType+scMarkerAgent+LLM	alveolar macrophage	1
Human Lung	8	Macrophages	ScType+ACT	Alveolar macrophage	1
Human Lung	8	Macrophages	CASSIA	Tissue-resident macrophage (myeloid) of the lung	1
Human Lung	8	Macrophages	ScType+CellMarker 2.0	Alveolar macrophage	1
Human Lung	8	Macrophages	ScType+CMA	mononuclear phagocyte	0.5
Human Lung	8	Macrophages	ScType+scMarkerAgent	alveolar macrophage	1
Human Lung	8	Macrophages	ScType+scMarkerAgent+LLM	alveolar macrophage	1
Human Lung	9	Basal	ScType+ACT	Basal cell	1
Human Lung	9	Basal	CASSIA	Airway basal cell–derived squamous metaplastic epithelium	1
Human Lung	9	Basal	ScType+CellMarker 2.0	Basal cell	1
Human Lung	9	Basal	ScType+CMA	basal cell	1
Human Lung	9	Basal	ScType+scMarkerAgent	basal cell	1
Human Lung	9	Basal	ScType+scMarkerAgent+LLM	basal cell	1
Human Lung	10	Fibroblasts	ScType+ACT	Fibroblast	1
Human Lung	10	Fibroblasts	CASSIA	Fibroblast / Mesenchymal stromal cell (lung fibroblast)	1
Human Lung	10	Fibroblasts	ScType+CellMarker 2.0	Fibroblast	1
Human Lung	10	Fibroblasts	ScType+CMA	alveolar adventitial fibroblast	1
Human Lung	10	Fibroblasts	ScType+scMarkerAgent	fibroblast of lung	1
Human Lung	10	Fibroblasts	ScType+scMarkerAgent+LLM	pulmonary interstitial fibroblast	1
Human Lung	11	Macrophages	ScType+ACT	Alveolar macrophage	1
Human Lung	11	Macrophages	CASSIA	Macrophages (mononuclear phagocytes), specifically tissue-resident / interstitial macrophages in lung	1
Human Lung	11	Macrophages	ScType+CellMarker 2.0	Alveolar macrophage	1
Human Lung	11	Macrophages	ScType+CMA	tissue-resident macrophage	1
Human Lung	11	Macrophages	ScType+scMarkerAgent	alveolar macrophage	1
Human Lung	11	Macrophages	ScType+scMarkerAgent+LLM	alveolar macrophage	1
Human Lung	12	Secretory	ScType+ACT	Club cell	0.5
Human Lung	12	Secretory	CASSIA	Airway epithelial secretory cells (non-ciliated conducting airway epithelium)	1
Human Lung	12	Secretory	ScType+CellMarker 2.0	Secretory cell	1
Human Lung	12	Secretory	ScType+CMA	bronchial goblet cell/tracheobronchial goblet cell	1
Human Lung	12	Secretory	ScType+scMarkerAgent	secretory cell	1
Human Lung	12	Secretory	ScType+scMarkerAgent+LLM	secretory cell	1
Human Lung	13	Basal	ScType+ACT	Basal cell	1
Human Lung	13	Basal	CASSIA	Cycling / proliferating cells, G2/M phase	0
Human Lung	13	Basal	ScType+CellMarker 2.0	Basal cell	1
Human Lung	13	Basal	ScType+CMA	basal cell	1
Human Lung	13	Basal	ScType+scMarkerAgent	cycling alveolar macrophage	0
Human Lung	13	Basal	ScType+scMarkerAgent+LLM	respiratory basal cell	1
Human Lung	14	AT1	ScType+ACT	Type I pneumocyte	0.5
Human Lung	14	AT1	CASSIA	Pleural mesothelial / mesothelial-like epithelial cell (serosal barrier epithelium associated with the lung surface)	0
Human Lung	14	AT1	ScType+CellMarker 2.0	Alveolar cell Type 1/Alveolar cell Type 2	1
Human Lung	14	AT1	ScType+CMA	pulmonary alveolar epithelial cell	0.5
Human Lung	14	AT1	ScType+scMarkerAgent	pulmonary alveolar type 1 cell	0.5
Human Lung	14	AT1	ScType+scMarkerAgent+LLM	Alveolar Intermediate (ATi) cell	1
Human Lung	15	Fibroblasts	ScType+ACT	Smooth muscle cell	1
Human Lung	15	Fibroblasts	CASSIA	Vascular smooth muscle cell (mural/perivascular cell)	1
Human Lung	15	Fibroblasts	ScType+CellMarker 2.0	Airway smooth muscle cell	1
Human Lung	15	Fibroblasts	ScType+CMA	pericyte	1
Human Lung	15	Fibroblasts	ScType+scMarkerAgent	smooth muscle cell	1
Human Lung	15	Fibroblasts	ScType+scMarkerAgent+LLM	smooth muscle cell	1
Human Lung	16	Mast cells	ScType+ACT	Mast cell	1
Human Lung	16	Mast cells	CASSIA	Activated tissue-resident mast cells (IL-33–responsive/type 2–skewed lung mast cells)	1
Human Lung	16	Mast cells	ScType+CellMarker 2.0	Basophil	0
Human Lung	16	Mast cells	ScType+CMA	basophil	0
Human Lung	16	Mast cells	ScType+scMarkerAgent	mast cell	1
Human Lung	16	Mast cells	ScType+scMarkerAgent+LLM	mast cell	1
Human Lung	17	Submucosal Secretory	ScType+ACT	Club cell	0.5
Human Lung	17	Submucosal Secretory	CASSIA	Proximal airway submucosal gland epithelial cell	1
Human Lung	17	Submucosal Secretory	ScType+CellMarker 2.0	Secretory cell	0.5
Human Lung	17	Submucosal Secretory	ScType+CMA	serous secreting cell	1
Human Lung	17	Submucosal Secretory	ScType+scMarkerAgent	serous secreting cell	1
Human Lung	17	Submucosal Secretory	ScType+scMarkerAgent+LLM	goblet cell	0.5
Human Lung	18	B cell lineage	ScType+ACT	B cell	1
Human Lung	18	B cell lineage	CASSIA	B lymphocyte	1
Human Lung	18	B cell lineage	ScType+CellMarker 2.0	B cell	1
Human Lung	18	B cell lineage	ScType+CMA	lymphocyte of B lineage	1
Human Lung	18	B cell lineage	ScType+scMarkerAgent	B cell	1
Human Lung	18	B cell lineage	ScType+scMarkerAgent+LLM	B cell	1
Human Lung	19	Lymphatic EC mature	ScType+ACT	Endothelial cell of lymphatic vessel	1
Human Lung	19	Lymphatic EC mature	CASSIA	Lymphatic endothelial cell – CCL21+ lymphoid-organizing pulmonary lymphatic endothelium	1
Human Lung	19	Lymphatic EC mature	ScType+CellMarker 2.0	Vascular cell	0.5
Human Lung	19	Lymphatic EC mature	ScType+CMA	endothelial cell of lymphatic vessel	1
Human Lung	19	Lymphatic EC mature	ScType+scMarkerAgent	endothelial cell of lymphatic vessel	1
Human Lung	19	Lymphatic EC mature	ScType+scMarkerAgent+LLM	endothelial cell of lymphatic vessel	1
Human Lung	20	Macrophages	ScType+ACT	CD8-positive, alpha-beta T cell	0
Human Lung	20	Macrophages	CASSIA	Cycling / mitotic cells (G2/M-phase enriched)	0.5
Human Lung	20	Macrophages	ScType+CellMarker 2.0	FOXN4+ cell	0
Human Lung	20	Macrophages	ScType+CMA	macrophage	1
Human Lung	20	Macrophages	ScType+scMarkerAgent	cycling alveolar macrophage	1
Human Lung	20	Macrophages	ScType+scMarkerAgent+LLM	cycling alveolar macrophage	1
Human Lung	21	Macrophages	ScType+ACT	Alveolar macrophage	1
Human Lung	21	Macrophages	CASSIA	Macrophage (myeloid lineage)	1
Human Lung	21	Macrophages	ScType+CellMarker 2.0	Macrophage	1
Human Lung	21	Macrophages	ScType+CMA	macrophage	1
Human Lung	21	Macrophages	ScType+scMarkerAgent	alveolar macrophage	1
Human Lung	21	Macrophages	ScType+scMarkerAgent+LLM	alveolar macrophage	1
Human Lung	22	AT2	ScType+ACT	Type II pneumocyte	1
Human Lung	22	AT2	CASSIA	Alveolar epithelial type 2 (AT2) cell	1
Human Lung	22	AT2	ScType+CellMarker 2.0	Lung epithelial cell	0.5
Human Lung	22	AT2	ScType+CMA	epithelial cell of lung	0.5
Human Lung	22	AT2	ScType+scMarkerAgent	induced pluripotent stem cell-derived alveolar epithelial type 2 cell	1
Human Lung	22	AT2	ScType+scMarkerAgent+LLM	pulmonary alveolar type 2 cell	1
Human Lung	23	Basal	ScType+ACT	Basal cell	1
Human Lung	23	Basal	CASSIA	Lung epithelial cell (airway-lineage)	0.5
Human Lung	23	Basal	ScType+CellMarker 2.0	Basal cell	1
Human Lung	23	Basal	ScType+CMA	basal cell	1
Human Lung	23	Basal	ScType+scMarkerAgent	basal cell	1
Human Lung	23	Basal	ScType+scMarkerAgent+LLM	basal cell	1
Human Pancreas	0	alpha	ScType+ACT	Pancreatic A cell	1
Human Pancreas	0	alpha	CASSIA	Pancreatic islet α-cells (glucagon-producing endocrine cells)	1
Human Pancreas	0	alpha	ScType+CellMarker 2.0	Alpha cell (α cell)	1
Human Pancreas	0	alpha	ScType+CMA	Macrophage (tissue-resident, professional phagocytic APC)	1
Human Pancreas	0	alpha	ScType+scMarkerAgent	pancreatic A cell	1
Human Pancreas	0	alpha	ScType+scMarkerAgent+LLM	pancreatic A cell	1
Human Pancreas	1	acinar	ScType+ACT	Acinar cell	1
Human Pancreas	1	acinar	CASSIA	Pancreatic exocrine acinar cell	1
Human Pancreas	1	acinar	ScType+CellMarker 2.0	Acinar cell	1
Human Pancreas	1	acinar	ScType+CMA	Mast cell	1
Human Pancreas	1	acinar	ScType+scMarkerAgent	acinar cell	1
Human Pancreas	1	acinar	ScType+scMarkerAgent+LLM	acinar cell	1
Human Pancreas	2	alpha	ScType+ACT	Pancreatic A cell	1
Human Pancreas	2	alpha	CASSIA	Pancreatic islet endocrine cell, β-cell lineage (insulin-producing)	1
Human Pancreas	2	alpha	ScType+CellMarker 2.0	Alpha cell (α cell)	1
Human Pancreas	2	alpha	ScType+CMA	pancreatic A cell	1
Human Pancreas	2	alpha	ScType+scMarkerAgent	pancreatic A cell	1
Human Pancreas	2	alpha	ScType+scMarkerAgent+LLM	pancreatic A cell	1
Human Pancreas	3	beta	ScType+ACT	Type B pancreatic cell	1
Human Pancreas	3	beta	CASSIA	Pancreatic islet β cell (mature)	1
Human Pancreas	3	beta	ScType+CellMarker 2.0	Beta cell(β cell)	1
Human Pancreas	3	beta	ScType+CMA	type B pancreatic cell	1
Human Pancreas	3	beta	ScType+scMarkerAgent	type B pancreatic cell	1
Human Pancreas	3	beta	ScType+scMarkerAgent+LLM	type B pancreatic cell	1
Human Pancreas	4	beta	ScType+ACT	Type B pancreatic cell	1
Human Pancreas	4	beta	CASSIA	Endocrine α-cell lineage	1
Human Pancreas	4	beta	ScType+CellMarker 2.0	Beta cell(β cell)	1
Human Pancreas	4	beta	ScType+CMA	type B pancreatic cell	1
Human Pancreas	4	beta	ScType+scMarkerAgent	type B pancreatic cell	1
Human Pancreas	4	beta	ScType+scMarkerAgent+LLM	mature β-cell	1
Human Pancreas	5	beta	ScType+ACT	Type B pancreatic cell	1
Human Pancreas	5	beta	CASSIA	Pancreatic exocrine ductal epithelium	1
Human Pancreas	5	beta	ScType+CellMarker 2.0	Beta cell(β cell)	1
Human Pancreas	5	beta	ScType+CMA	type B pancreatic cell	1
Human Pancreas	5	beta	ScType+scMarkerAgent	type B pancreatic cell	1
Human Pancreas	5	beta	ScType+scMarkerAgent+LLM	mature β-cell	1
Human Pancreas	6	delta	ScType+ACT	Pancreatic D cell	1
Human Pancreas	6	delta	CASSIA	Pancreatic islet δ-cell (somatostatin-producing), LEPR^high / RBP4^high δ-cell subtype	0.5
Human Pancreas	6	delta	ScType+CellMarker 2.0	Delta cell	1
Human Pancreas	6	delta	ScType+CMA	pancreatic D cell	1
Human Pancreas	6	delta	ScType+scMarkerAgent	pancreatic D cell	1
Human Pancreas	6	delta	ScType+scMarkerAgent+LLM	pancreatic D cell	1
Human Pancreas	7	ductal	ScType+ACT	Ductal cell	1
Human Pancreas	7	ductal	CASSIA	Pancreatic islet β cell (mature, insulin-secreting)	1
Human Pancreas	7	ductal	ScType+CellMarker 2.0	Ductal cell	1
Human Pancreas	7	ductal	ScType+CMA	pancreatic ductal cell	1
Human Pancreas	7	ductal	ScType+scMarkerAgent	pancreatic ductal cell	1
Human Pancreas	7	ductal	ScType+scMarkerAgent+LLM	pancreatic ductal cell	1
Human Pancreas	8	ductal	ScType+ACT	Epithelial cell	0.5
Human Pancreas	8	ductal	CASSIA	Blood vascular endothelial cells	1
Human Pancreas	8	ductal	ScType+CellMarker 2.0	Ductal epithelial cell	1
Human Pancreas	8	ductal	ScType+CMA	pancreatic ductal cell	1
Human Pancreas	8	ductal	ScType+scMarkerAgent	pancreatic ductal cell	1
Human Pancreas	8	ductal	ScType+scMarkerAgent+LLM	pancreatic ductal cell	1
Human Pancreas	9	activated_stellate	ScType+ACT	Fibroblast	0.5
Human Pancreas	9	activated_stellate	CASSIA	Stromal fibroblast / activated fibroblast (pancreatic interstitial fibroblast / pancreatic stellate cell–like)	0.5
Human Pancreas	9	activated_stellate	ScType+CellMarker 2.0	Fibroblast	0.5
Human Pancreas	9	activated_stellate	ScType+CMA	mesenchymal stem cell	0.5
Human Pancreas	9	activated_stellate	ScType+scMarkerAgent	fibroblast	0.5
Human Pancreas	9	activated_stellate	ScType+scMarkerAgent+LLM	fibroblast	0.5
Human Pancreas	10	gamma	ScType+ACT	Pancreatic PP cell	1
Human Pancreas	10	gamma	CASSIA	Pancreatic islet endocrine cell	1
Human Pancreas	10	gamma	ScType+CellMarker 2.0	Pancreatic polypeptide cell	1
Human Pancreas	10	gamma	ScType+CMA	pancreatic PP cell	1
Human Pancreas	10	gamma	ScType+scMarkerAgent	pancreatic PP cell	1
Human Pancreas	10	gamma	ScType+scMarkerAgent+LLM	pancreatic PP cell	1
Human Pancreas	11	endothelial	ScType+ACT	Endothelial cell	1
Human Pancreas	11	endothelial	CASSIA	Pancreatic endocrine islet cell	1
Human Pancreas	11	endothelial	ScType+CellMarker 2.0	Endothelial cell	1
Human Pancreas	11	endothelial	ScType+CMA	endothelial cell	1
Human Pancreas	11	endothelial	ScType+scMarkerAgent	endothelial cell	1
Human Pancreas	11	endothelial	ScType+scMarkerAgent+LLM	endothelial cell	1
Human Pancreas	12	quiescent_stellate	ScType+ACT	Vascular associated smooth muscle cell	0.5
Human Pancreas	12	quiescent_stellate	CASSIA	Pericyte (perivascular mural cell) – most consistent with peri‑islet/peri‑acinar pancreatic pericytes	0.5
Human Pancreas	12	quiescent_stellate	ScType+CellMarker 2.0	Smooth muscle cell	0.5
Human Pancreas	12	quiescent_stellate	ScType+CMA	mesenchymal stem cell	0.5
Human Pancreas	12	quiescent_stellate	ScType+scMarkerAgent	pericyte	0.5
Human Pancreas	12	quiescent_stellate	ScType+scMarkerAgent+LLM	pericyte	0.5
Human Pancreas	13	ductal	ScType+ACT	Progenitor cell	0.5
Human Pancreas	13	ductal	CASSIA	Pancreatic ductal epithelial cells (intestinalized / enterocyte-like, mucosal-like, inflamed state)	1
Human Pancreas	13	ductal	ScType+CellMarker 2.0	Acinar cell	0
Human Pancreas	13	ductal	ScType+CMA	pancreatic acinar cell	0
Human Pancreas	13	ductal	ScType+scMarkerAgent	acinar cell	0
Human Pancreas	13	ductal	ScType+scMarkerAgent+LLM	acinar cell	0
Human Pancreas	14	macrophage	ScType+ACT	Macrophage	1
Human Pancreas	14	macrophage	CASSIA	Pancreatic epithelial, highly secretory cells	0
Human Pancreas	14	macrophage	ScType+CellMarker 2.0	Macrophage	1
Human Pancreas	14	macrophage	ScType+CMA	mononuclear phagocyte	0.5
Human Pancreas	14	macrophage	ScType+scMarkerAgent	leukocyte	0.5
Human Pancreas	14	macrophage	ScType+scMarkerAgent+LLM	macrophage	1
Human Pancreas	15	ductal	ScType+ACT	Epithelial cell	0.5
Human Pancreas	15	ductal	CASSIA	Epithelial – pancreatic ductal / duct-like epithelial cells	0.5
Human Pancreas	15	ductal	ScType+CellMarker 2.0	Ductal cell	1
Human Pancreas	15	ductal	ScType+CMA	pancreatic ductal cell	0.5
Human Pancreas	15	ductal	ScType+scMarkerAgent	pancreatic ductal cell	1
Human Pancreas	15	ductal	ScType+scMarkerAgent+LLM	pancreatic ductal cell	1
Human PBMC	0	CD4+/CD45RA+/CD25- Naive T	ScType+ACT	Unknown	0
Human PBMC	0	CD4+/CD45RA+/CD25- Naive T	CASSIA	T lymphocyte	0.5
Human PBMC	0	CD4+/CD45RA+/CD25- Naive T	ScType+CellMarker 2.0	Unknown	0
Human PBMC	0	CD4+/CD45RA+/CD25- Naive T	ScType+CMA	erythrocyte	0
Human PBMC	0	CD4+/CD45RA+/CD25- Naive T	ScType+scMarkerAgent	CD4 positive CD3 negative CD14 negative cell	0
Human PBMC	0	CD4+/CD45RA+/CD25- Naive T	ScType+scMarkerAgent+LLM	naive thymus-derived CD4-positive, alpha-beta T cell	1
Human PBMC	1	CD8+/CD45RA+ Naive Cytotoxic	ScType+ACT	Double-positive, alpha-beta thymocyte/Gamma-delta T cell	0
Human PBMC	1	CD8+/CD45RA+ Naive Cytotoxic	CASSIA	CD8+ T lymphocyte (T cell)	0.5
Human PBMC	1	CD8+/CD45RA+ Naive Cytotoxic	ScType+CellMarker 2.0	CD8 T cell/Naive T cell	0.5
Human PBMC	1	CD8+/CD45RA+ Naive Cytotoxic	ScType+CMA	central memory CD8-positive, alpha-beta T cell	0.5
Human PBMC	1	CD8+/CD45RA+ Naive Cytotoxic	ScType+scMarkerAgent	naïve CD8 positive T cell	1
Human PBMC	1	CD8+/CD45RA+ Naive Cytotoxic	ScType+scMarkerAgent+LLM	naïve CD8 positive T cell	1
Human PBMC	2	CD4+/CD25 T Reg	ScType+ACT	Central memory CD4-positive, alpha-beta T cell	1
Human PBMC	2	CD4+/CD25 T Reg	CASSIA	T lymphocyte (T cell)	0.5
Human PBMC	2	CD4+/CD25 T Reg	ScType+CellMarker 2.0	Regulatory T(Treg) cell	0.5
Human PBMC	2	CD4+/CD25 T Reg	ScType+CMA	CD4-positive, alpha-beta memory T cell	1
Human PBMC	2	CD4+/CD25 T Reg	ScType+scMarkerAgent	memory CD4 positive T cell	1
Human PBMC	2	CD4+/CD25 T Reg	ScType+scMarkerAgent+LLM	memory CD4 positive T cell	1
Human PBMC	3	CD19+ B	ScType+ACT	B cell	1
Human PBMC	3	CD19+ B	CASSIA	Conventional B lymphocyte (CD20+ B cell)	1
Human PBMC	3	CD19+ B	ScType+CellMarker 2.0	B cell	1
Human PBMC	3	CD19+ B	ScType+CMA	B cell	1
Human PBMC	3	CD19+ B	ScType+scMarkerAgent	B cell	1
Human PBMC	3	CD19+ B	ScType+scMarkerAgent+LLM	naive B cell	1
Human PBMC	4	CD4+/CD45RO+ Memory	ScType+ACT	Central memory CD4-positive, alpha-beta T cell	1
Human PBMC	4	CD4+/CD45RO+ Memory	CASSIA	CD4+ IL7R+ memory/effector T cells	0.5
Human PBMC	4	CD4+/CD45RO+ Memory	ScType+CellMarker 2.0	Memory T cell	0.5
Human PBMC	4	CD4+/CD45RO+ Memory	ScType+CMA	effector memory CD4-positive, alpha-beta T cell	0.5
Human PBMC	4	CD4+/CD45RO+ Memory	ScType+scMarkerAgent	central memory CD4-positive, alpha-beta T cell	1
Human PBMC	4	CD4+/CD45RO+ Memory	ScType+scMarkerAgent+LLM	CD4-positive, alpha-beta memory T cell	1
Human PBMC	5	CD56+ NK	ScType+ACT	Natural killer cell	1
Human PBMC	5	CD56+ NK	CASSIA	Natural Killer (NK) cell – cytotoxic NK lineage	1
Human PBMC	5	CD56+ NK	ScType+CellMarker 2.0	Natural killer cell	1
Human PBMC	5	CD56+ NK	ScType+CMA	CD16-positive, CD56-dim natural killer cell, human	0
Human PBMC	5	CD56+ NK	ScType+scMarkerAgent	natural killer cell	1
Human PBMC	5	CD56+ NK	ScType+scMarkerAgent+LLM	natural killer cell	1
Human PBMC	6	CD8+ Cytotoxic T	ScType+ACT	Effector memory CD45RA-positive, alpha-beta T cell, terminally differentiated	0.5
Human PBMC	6	CD8+ Cytotoxic T	CASSIA	CD8+ cytotoxic T lymphocyte (CD8 T cell)	1
Human PBMC	6	CD8+ Cytotoxic T	ScType+CellMarker 2.0	Finally highly effector (TEMRA) memory T cell	0.5
Human PBMC	6	CD8+ Cytotoxic T	ScType+CMA	mature CD8 single-positive thymocyte	0.5
Human PBMC	6	CD8+ Cytotoxic T	ScType+scMarkerAgent	effector memory CD8-positive, alpha-beta T cell	1
Human PBMC	6	CD8+ Cytotoxic T	ScType+scMarkerAgent+LLM	effector memory CD8-positive, alpha-beta T cell	1
Human PBMC	7	CD34+	ScType+ACT	Hematopoietic stem cell	1
Human PBMC	7	CD34+	CASSIA	B-lineage–biased hematopoietic progenitors (Early B-cell progenitors / Pro-B cells, CD34+TdT+VPREB1+)	1
Human PBMC	7	CD34+	ScType+CellMarker 2.0	Multilymphoid progenitor cell	1
Human PBMC	7	CD34+	ScType+CMA	hematopoietic precursor cell	1
Human PBMC	7	CD34+	ScType+scMarkerAgent	hematopoietic stem cell	1
Human PBMC	7	CD34+	ScType+scMarkerAgent+LLM	hematopoietic stem cell	1
Human PBMC	8	CD34+	ScType+ACT	Classical monocyte	1
Human PBMC	8	CD34+	CASSIA	circulating classical CD14++ inflammatory monocytes (FCN1+/VCAN+ S100A8/A9/A12+)	1
Human PBMC	8	CD34+	ScType+CellMarker 2.0	CD1C-CD141- dendritic cell	0
Human PBMC	8	CD34+	ScType+CMA	mononuclear phagocyte	1
Human PBMC	8	CD34+	ScType+scMarkerAgent	CD14-positive monocyte	1
Human PBMC	8	CD34+	ScType+scMarkerAgent+LLM	classical monocyte	1
Human PBMC	9	CD34+	ScType+ACT	Hematopoietic stem cell	0.5
Human PBMC	9	CD34+	CASSIA	Mast cell lineage (mast cells / mast cell progenitors)	0.5
Human PBMC	9	CD34+	ScType+CellMarker 2.0	Hematopoietic stem cell	0.5
Human PBMC	9	CD34+	ScType+CMA	mast cell	0.5
Human PBMC	9	CD34+	ScType+scMarkerAgent	hematopoietic stem cell	0.5
Human PBMC	9	CD34+	ScType+scMarkerAgent+LLM	hematopoietic stem cell	0.5
Human PBMC	10	CD19+ B	ScType+ACT	Granulocyte	0
Human PBMC	10	CD19+ B	CASSIA	Memory B cells, enriched for activated / class-switched / pre-plasmablast-like phenotypes	1
Human PBMC	10	CD19+ B	ScType+CellMarker 2.0	B cell	1
Human PBMC	10	CD19+ B	ScType+CMA	B cell	1
Human PBMC	10	CD19+ B	ScType+scMarkerAgent	CD56 positive IL-15 DC	0
Human PBMC	10	CD19+ B	ScType+scMarkerAgent+LLM	B cell	1
Human PBMC	11	CD56+ NK	ScType+ACT	Natural killer cell	1
Human PBMC	11	CD56+ NK	CASSIA	Proliferating cytotoxic CD8 T cell (cycling effector/effector-memory CD8 T)	0
Human PBMC	11	CD56+ NK	ScType+CellMarker 2.0	Effector CD8+ memory T (Tem) cell	0
Human PBMC	11	CD56+ NK	ScType+CMA	natural killer cell	1
Human PBMC	11	CD56+ NK	ScType+scMarkerAgent	natural killer cell	1
Human PBMC	11	CD56+ NK	ScType+scMarkerAgent+LLM	CD16-positive, CD56-dim natural killer cell, human	1
Human PBMC	12	Dendritic	ScType+ACT	Plasmablast	1
Human PBMC	12	Dendritic	CASSIA	B-lineage antibody-secreting cell (plasmablast/plasma cell)	1
Human PBMC	12	Dendritic	ScType+CellMarker 2.0	Plasmablast	1
Human PBMC	12	Dendritic	ScType+CMA	plasma cell	1
Human PBMC	12	Dendritic	ScType+scMarkerAgent	plasma cell	1
Human PBMC	12	Dendritic	ScType+scMarkerAgent+LLM	plasma cell	1
Mouse Pancreas	0	beta	ScType+ACT	Enterochromaffin-like cell	0
Mouse Pancreas	0	beta	CASSIA	Pancreatic islet β cell	1
Mouse Pancreas	0	beta	ScType+CellMarker 2.0	Beta cell(β cell)	1
Mouse Pancreas	0	beta	ScType+CMA	somatostatin secreting cell	0
Mouse Pancreas	0	beta	ScType+scMarkerAgent	type B pancreatic cell	1
Mouse Pancreas	0	beta	ScType+scMarkerAgent+LLM	type B pancreatic cell	1
Mouse Pancreas	1	beta	ScType+ACT	Enterochromaffin-like cell	0
Mouse Pancreas	1	beta	CASSIA	Pancreatic islet endocrine / neuroendocrine cell	0.5
Mouse Pancreas	1	beta	ScType+CellMarker 2.0	Beta cell(β cell)	1
Mouse Pancreas	1	beta	ScType+CMA	somatostatin secreting cell	0
Mouse Pancreas	1	beta	ScType+scMarkerAgent	type B pancreatic cell	1
Mouse Pancreas	1	beta	ScType+scMarkerAgent+LLM	type B pancreatic cell	1
Mouse Pancreas	2	ductal	ScType+ACT	Ductal cell	1
Mouse Pancreas	2	ductal	CASSIA	Pancreatic ductal epithelial cells	1
Mouse Pancreas	2	ductal	ScType+CellMarker 2.0	Ductal cell	1
Mouse Pancreas	2	ductal	ScType+CMA	pancreatic ductal cell	1
Mouse Pancreas	2	ductal	ScType+scMarkerAgent	pancreatic ductal cell	1
Mouse Pancreas	2	ductal	ScType+scMarkerAgent+LLM	pancreatic ductal cell	1
Mouse Pancreas	3	beta	ScType+ACT	Unknown	0
Mouse Pancreas	3	beta	CASSIA	Pancreatic islet endocrine cell, specifically β lineage.	1
Mouse Pancreas	3	beta	ScType+CellMarker 2.0	Unknown	0
Mouse Pancreas	3	beta	ScType+CMA	Unknown	0
Mouse Pancreas	3	beta	ScType+scMarkerAgent	type B pancreatic cell	1
Mouse Pancreas	3	beta	ScType+scMarkerAgent+LLM	β cell cluster	1
Mouse Pancreas	4	alpha	ScType+ACT	Pancreatic A cell	1
Mouse Pancreas	4	alpha	CASSIA	Pancreatic islet endocrine α-cell (glucagon-producing α-cell, α-like subtype with mild PP/Pyy coexpression).	1
Mouse Pancreas	4	alpha	ScType+CellMarker 2.0	Alpha cell (α cell)	1
Mouse Pancreas	4	alpha	ScType+CMA	pancreatic A cell	1
Mouse Pancreas	4	alpha	ScType+scMarkerAgent	pancreatic A cell	1
Mouse Pancreas	4	alpha	ScType+scMarkerAgent+LLM	α-cell	1
Mouse Pancreas	5	delta	ScType+ACT	Pancreatic D cell	1
Mouse Pancreas	5	delta	CASSIA	Neuron / neuroendocrine cell of the intrapancreatic nervous system (islet-associated neuron)	0
Mouse Pancreas	5	delta	ScType+CellMarker 2.0	Delta cell	1
Mouse Pancreas	5	delta	ScType+CMA	pancreatic D cell	1
Mouse Pancreas	5	delta	ScType+scMarkerAgent	pancreatic D cell	1
Mouse Pancreas	5	delta	ScType+scMarkerAgent+LLM	pancreatic D cell	1
Mouse Pancreas	6	endothelial	ScType+ACT	Endothelial cell	1
Mouse Pancreas	6	endothelial	CASSIA	Endothelial cells (vascular endothelial, microvascular/fenestrated)	1
Mouse Pancreas	6	endothelial	ScType+CellMarker 2.0	Endothelial cell	1
Mouse Pancreas	6	endothelial	ScType+CMA	endothelial cell	1
Mouse Pancreas	6	endothelial	ScType+scMarkerAgent	endothelial cell	1
Mouse Pancreas	6	endothelial	ScType+scMarkerAgent+LLM	endothelial cell	1
Mouse Pancreas	7	quiescent_stellate	ScType+ACT	Pancreatic stellate cell	0
Mouse Pancreas	7	quiescent_stellate	CASSIA	Pericyte / mural cell (perivascular mesenchymal cell)	0.5
Mouse Pancreas	7	quiescent_stellate	ScType+CellMarker 2.0	Fibroblast	0.5
Mouse Pancreas	7	quiescent_stellate	ScType+CMA	pancreatic stellate cell	0.5
Mouse Pancreas	7	quiescent_stellate	ScType+scMarkerAgent	pancreatic stellate cell	0.5
Mouse Pancreas	7	quiescent_stellate	ScType+scMarkerAgent+LLM	quiescent stellate cell	1
Mouse Pancreas	8	macrophage	ScType+ACT	Macrophage	1
Mouse Pancreas	8	macrophage	CASSIA	Macrophage (tissue-resident / monocyte-derived macrophage)	1
Mouse Pancreas	8	macrophage	ScType+CellMarker 2.0	Macrophage	1
Mouse Pancreas	8	macrophage	ScType+CMA	macrophage	1
Mouse Pancreas	8	macrophage	ScType+scMarkerAgent	macrophage	1
Mouse Pancreas	8	macrophage	ScType+scMarkerAgent+LLM	macrophage	1
Mouse Pancreas	9	B_cell	ScType+ACT	B cell	1
Mouse Pancreas	9	B_cell	CASSIA	T lymphocytes (activated αβ T cells)	0
Mouse Pancreas	9	B_cell	ScType+CellMarker 2.0	T cell	0
Mouse Pancreas	9	B_cell	ScType+CMA	hematopoietic cell	0.5
Mouse Pancreas	9	B_cell	ScType+scMarkerAgent	leukocyte	0.5
Mouse Pancreas	9	B_cell	ScType+scMarkerAgent+LLM	B cell	1
Human Glioblastoma	0	TAM-MG	ScType+ACT	Homeostatic microglial cell	0.5
Human Glioblastoma	0	TAM-MG	CASSIA	Microglia (CNS-resident macrophages)	0.5
Human Glioblastoma	0	TAM-MG	ScType+CellMarker 2.0	Microglial cell	0.5
Human Glioblastoma	0	TAM-MG	ScType+CMA	Neoplastic Myeloid Cell	0.5
Human Glioblastoma	0	TAM-MG	ScType+scMarkerAgent	peripheral EC type II: Pe2	0
Human Glioblastoma	0	TAM-MG	ScType+scMarkerAgent+LLM	microglial cell	0.5
Human Glioblastoma	1	TAM-BDM	ScType+ACT	Macrophage	0.5
Human Glioblastoma	1	TAM-BDM	CASSIA	Myeloid lineage – tissue macrophages (brain-resident border-associated/perivascular macrophages / macrophage-like myeloid cells)	0.5
Human Glioblastoma	1	TAM-BDM	ScType+CellMarker 2.0	Myeloid cell	0.5
Human Glioblastoma	1	TAM-BDM	ScType+CMA	Neoplastic Myeloid Cell	0.5
Human Glioblastoma	1	TAM-BDM	ScType+scMarkerAgent	macrophage	0.5
Human Glioblastoma	1	TAM-BDM	ScType+scMarkerAgent+LLM	macrophage	0.5
Human Glioblastoma	2	CD4/CD8	ScType+ACT	T cell	0.5
Human Glioblastoma	2	CD4/CD8	CASSIA	CD8+ cytotoxic T cell	1
Human Glioblastoma	2	CD4/CD8	ScType+CellMarker 2.0	T cell	0.5
Human Glioblastoma	2	CD4/CD8	ScType+CMA	Mature T-Lymphocyte	0.5
Human Glioblastoma	2	CD4/CD8	ScType+scMarkerAgent	T cell	0.5
Human Glioblastoma	2	CD4/CD8	ScType+scMarkerAgent+LLM	tissue-resident memory T cells (T_rm)	1
Human Glioblastoma	3	MES-like	ScType+ACT	Astrocyte	0.5
Human Glioblastoma	3	MES-like	CASSIA	Perivascular / meningeal fibroblast-like stromal cell (brain perivascular fibroblast / leptomeningeal fibroblast class)	0.5
Human Glioblastoma	3	MES-like	ScType+CellMarker 2.0	Astrocyte	0.5
Human Glioblastoma	3	MES-like	ScType+CMA	Neoplastic Astrocyte	0.5
Human Glioblastoma	3	MES-like	ScType+scMarkerAgent	mesenchymal glioblastoma multiforme	1
Human Glioblastoma	3	MES-like	ScType+scMarkerAgent+LLM	mesenchymal glioblastoma multiforme	1
Human Glioblastoma	4	AC-like	ScType+ACT	GABAergic interneuron/GABAergic neuron	0
Human Glioblastoma	4	AC-like	CASSIA	Oligodendrocyte precursor cell (OPC) / OPC-like glial progenitor	0.5
Human Glioblastoma	4	AC-like	ScType+CellMarker 2.0	Astrocyte	0.5
Human Glioblastoma	4	AC-like	ScType+CMA	Neoplastic Astrocyte	1
Human Glioblastoma	4	AC-like	ScType+scMarkerAgent	exhausted, terminally differentiated population of CD8 positive T cell	0
Human Glioblastoma	4	AC-like	ScType+scMarkerAgent+LLM	astrocyte-like cell	1
Human Glioblastoma	5	AC-like	ScType+ACT	Astrocyte	1
Human Glioblastoma	5	AC-like	CASSIA	Excitatory (glutamatergic) cortical neuron	0
Human Glioblastoma	5	AC-like	ScType+CellMarker 2.0	Cancer cell	0.5
Human Glioblastoma	5	AC-like	ScType+CMA	Neoplastic Cell	0.5
Human Glioblastoma	5	AC-like	ScType+scMarkerAgent	earliest malignant cell population/oligodendrocyte lineage/oligodendrocyte precursor-like cell/progenitor cancer cell/proliferative glioblastoma/proneural	1
Human Glioblastoma	5	AC-like	ScType+scMarkerAgent+LLM	proneural	1
Human Glioblastoma	6	CD4/CD8	ScType+ACT	Plasma cell	0
Human Glioblastoma	6	CD4/CD8	CASSIA	T cell (CD3+ αβ T lymphocyte); cytotoxic/effector T cell; brain-infiltrating or perivascular cytotoxic T lymphocyte	1
Human Glioblastoma	6	CD4/CD8	ScType+CellMarker 2.0	B cell	0
Human Glioblastoma	6	CD4/CD8	ScType+CMA	Neoplastic B-Lymphocyte	0
Human Glioblastoma	6	CD4/CD8	ScType+scMarkerAgent	B cell	0
Human Glioblastoma	6	CD4/CD8	ScType+scMarkerAgent+LLM	CD8-positive, alpha-beta cytotoxic T cell	1
Human Glioblastoma	7	AC-like	ScType+ACT	Astrocyte	1
Human Glioblastoma	7	AC-like	CASSIA	Glial cell – astrocyte-lineage (reactive / mesenchymal-like astrocytes)	1
Human Glioblastoma	7	AC-like	ScType+CellMarker 2.0	Astrocyte	0.5
Human Glioblastoma	7	AC-like	ScType+CMA	Malignant Cell	0.5
Human Glioblastoma	7	AC-like	ScType+scMarkerAgent	astrocyte/tumor mesenchymal stem-like cells	0.5
Human Glioblastoma	7	AC-like	ScType+scMarkerAgent+LLM	astrocyte	0.5
Human Glioblastoma	8	Oligodendrocyte	ScType+ACT	Oligodendrocyte	1
Human Glioblastoma	8	Oligodendrocyte	CASSIA	CNS oligodendrocyte, specifically mature myelinating oligodendrocyte	1
Human Glioblastoma	8	Oligodendrocyte	ScType+CellMarker 2.0	Oligodendrocyte	1
Human Glioblastoma	8	Oligodendrocyte	ScType+CMA	Neoplastic Oligodendrocyte	0.5
Human Glioblastoma	8	Oligodendrocyte	ScType+scMarkerAgent	oligodendrocyte	1
Human Glioblastoma	8	Oligodendrocyte	ScType+scMarkerAgent+LLM	oligodendrocyte	1
Human Glioblastoma	9	TAM-MG	ScType+ACT	Inflammatory macrophage	0.5
Human Glioblastoma	9	TAM-MG	CASSIA	Antigen-presenting myeloid cell, most consistent with dendritic cells (DCs) rather than microglia or generic monocytes	0
Human Glioblastoma	9	TAM-MG	ScType+CellMarker 2.0	Microglial cell	0.5
Human Glioblastoma	9	TAM-MG	ScType+CMA	Mononucleated Blood Cell	0.5
Human Glioblastoma	9	TAM-MG	ScType+scMarkerAgent	activated microglia	1
Human Glioblastoma	9	TAM-MG	ScType+scMarkerAgent+LLM	tumor-associated macrophage	0.5
Human Glioblastoma	10	OPC-like	ScType+ACT	Conventional dendritic cell	0
Human Glioblastoma	10	OPC-like	CASSIA	Cycling (G2/M phase) cells in brain tissue (mitotic/proliferative cell cluster)	0.5
Human Glioblastoma	10	OPC-like	ScType+CellMarker 2.0	Unknown	0
Human Glioblastoma	10	OPC-like	ScType+CMA	Unknown	0
Human Glioblastoma	10	OPC-like	ScType+scMarkerAgent	cycling glial cell	0.5
Human Glioblastoma	10	OPC-like	ScType+scMarkerAgent+LLM	oligodendrocyte precursor-like cell	1
Human Glioblastoma	11	CD4/CD8	ScType+ACT	Natural killer cell	0
Human Glioblastoma	11	CD4/CD8	CASSIA	CD8+ tissue-resident cytotoxic T cells (TRM-like, NK-receptor+)	1
Human Glioblastoma	11	CD4/CD8	ScType+CellMarker 2.0	Conventional CD8+ T cell	1
Human Glioblastoma	11	CD4/CD8	ScType+CMA	Neoplastic Natural Killer Cell	0
Human Glioblastoma	11	CD4/CD8	ScType+scMarkerAgent	effector T cell	1
Human Glioblastoma	11	CD4/CD8	ScType+scMarkerAgent+LLM	tissue-resident memory T cells (T_rm)	1
Human Glioblastoma	12	NPC-like	ScType+ACT	Neuroblast (sensu Vertebrata)	1
Human Glioblastoma	12	NPC-like	CASSIA	Immature neurons / neuroblasts	1
Human Glioblastoma	12	NPC-like	ScType+CellMarker 2.0	Neuron	1
Human Glioblastoma	12	NPC-like	ScType+CMA	Neuron	1
Human Glioblastoma	12	NPC-like	ScType+scMarkerAgent	neural progenitor cell	1
Human Glioblastoma	12	NPC-like	ScType+scMarkerAgent+LLM	neural progenitor cell	1
Human Glioblastoma	13	AC-like	ScType+ACT	Astrocyte	0.5
Human Glioblastoma	13	AC-like	CASSIA	Motile multiciliated epithelial cell of the ventricular/CSF interface	1
Human Glioblastoma	13	AC-like	ScType+CellMarker 2.0	Glial cell	0.5
Human Glioblastoma	13	AC-like	ScType+CMA	Neoplastic Blast	0.5
Human Glioblastoma	13	AC-like	ScType+scMarkerAgent	CD274 positive astrocyte/Differentiated GBM cell/human neural stem/progenitor cells/immature astrocyte/mature astrocyte/mature glioneuronal/mature neural tumor cell/microglia/astrocyte/proliferative radial glia/radial glial cell	0.5
Human Glioblastoma	13	AC-like	ScType+scMarkerAgent+LLM	radial glial cell	0.5
Human Glioblastoma	14	TAM-BDM	ScType+ACT	Plasma cell	0
Human Glioblastoma	14	TAM-BDM	CASSIA	Myeloid – FOLR2+ border-associated/perivascular macrophages (brain-resident, non-parenchymal macrophages; MHC-IIhigh, IGF1+/BAFF+)	1
Human Glioblastoma	14	TAM-BDM	ScType+CellMarker 2.0	B cell	0
Human Glioblastoma	14	TAM-BDM	ScType+CMA	Neoplastic Plasma Cell	0
Human Glioblastoma	14	TAM-BDM	ScType+scMarkerAgent	B cell	0
Human Glioblastoma	14	TAM-BDM	ScType+scMarkerAgent+LLM	macrophage	0.5
Human Glioblastoma	15	Mono	ScType+ACT	Neutrophil	0
Human Glioblastoma	15	Mono	CASSIA	Infiltrating myeloid cell – specifically classical inflammatory monocytes / monocyte-derived macrophages (not resident microglia).	1
Human Glioblastoma	15	Mono	ScType+CellMarker 2.0	Conventional dendritic cell 2b(cDC2b)	0
Human Glioblastoma	15	Mono	ScType+CMA	Conventional Dendritic Cell	0
Human Glioblastoma	15	Mono	ScType+scMarkerAgent	classical monocyte	1
Human Glioblastoma	15	Mono	ScType+scMarkerAgent+LLM	classical monocyte	1
Human Glioblastoma	16	TAM-BDM	ScType+ACT	Fibroblast	0
Human Glioblastoma	16	TAM-BDM	CASSIA	Brain-resident macrophage (non-parenchymal)	1
Human Glioblastoma	16	TAM-BDM	ScType+CellMarker 2.0	Mesenchymal glioblastoma cell	0
Human Glioblastoma	16	TAM-BDM	ScType+CMA	Pericyte	0
Human Glioblastoma	16	TAM-BDM	ScType+scMarkerAgent	fibroblast	0
Human Glioblastoma	16	TAM-BDM	ScType+scMarkerAgent+LLM	macrophage	0.5
Human Glioblastoma	17	MES-like	ScType+ACT	Erythrocyte	0
Human Glioblastoma	17	MES-like	CASSIA	Perivascular / meningeal fibroblast-like stromal cell (vascular-associated fibroblast)	0
Human Glioblastoma	17	MES-like	ScType+CellMarker 2.0	Mesenchymal cell	0.5
Human Glioblastoma	17	MES-like	ScType+CMA	Stromal Cell	0.5
Human Glioblastoma	17	MES-like	ScType+scMarkerAgent	mesenchymal cell	0.5
Human Glioblastoma	17	MES-like	ScType+scMarkerAgent+LLM	mesenchymal glioblastoma multiforme	1
Human Glioblastoma	18	NPC-like	ScType+ACT	Neuroblast (sensu Vertebrata)	1
Human Glioblastoma	18	NPC-like	CASSIA	Neuronal lineage – ASCL1+ neuroblasts / immature excitatory projection neurons (GRID2+, CA10+, PFN2+, SYT1+)	0.5
Human Glioblastoma	18	NPC-like	ScType+CellMarker 2.0	Neuron	0.5
Human Glioblastoma	18	NPC-like	ScType+CMA	Neuron	0.5
Human Glioblastoma	18	NPC-like	ScType+scMarkerAgent	neural progenitor cell-like	1
Human Glioblastoma	18	NPC-like	ScType+scMarkerAgent+LLM	glioblastoma stem cell	0.5
Human Glioblastoma	19	TAM-MG	ScType+ACT	Erythrocyte	0
Human Glioblastoma	19	TAM-MG	CASSIA	Myeloid (microglia/macrophage lineage)	0.5
Human Glioblastoma	19	TAM-MG	ScType+CellMarker 2.0	Microglia-derived tumor-associated macrophage(Mg-TAM)	1
Human Glioblastoma	19	TAM-MG	ScType+CMA	Leukocyte/Neoplastic Hematopoietic and Lymphoid Cell	0.5
Human Glioblastoma	19	TAM-MG	ScType+scMarkerAgent	monocyte-derived myeloid cell/S100A9+_Microglia	1
Human Glioblastoma	19	TAM-MG	ScType+scMarkerAgent+LLM	macrophage	0.5
Human Glioblastoma	20	MES-like	ScType+ACT	Astrocyte	1
Human Glioblastoma	20	MES-like	CASSIA	Astrocyte (glial cell)	1
Human Glioblastoma	20	MES-like	ScType+CellMarker 2.0	Glial cell	1
Human Glioblastoma	20	MES-like	ScType+CMA	Neoplastic Cell	0.5
Human Glioblastoma	20	MES-like	ScType+scMarkerAgent	CD274 positive astrocyte/Differentiated GBM cell/human neural stem/progenitor cells/immature astrocyte/mature astrocyte/mature glioneuronal/mature neural tumor cell/microglia/astrocyte/proliferative radial glia/radial glial cell	0.5
Human Glioblastoma	20	MES-like	ScType+scMarkerAgent+LLM	radial glial cell	1
Human Glioblastoma	21	NPC-like	ScType+ACT	Neuroblast (sensu Vertebrata)	1
Human Glioblastoma	21	NPC-like	CASSIA	Neuronal lineage (excitatory projection/immature neuron–like)	0.5
Human Glioblastoma	21	NPC-like	ScType+CellMarker 2.0	Neuron	0.5
Human Glioblastoma	21	NPC-like	ScType+CMA	Cancer Stem Cell	0.5
Human Glioblastoma	21	NPC-like	ScType+scMarkerAgent	neoplastic cell	0.5
Human Glioblastoma	21	NPC-like	ScType+scMarkerAgent+LLM	glioblastoma stem cell	0.5
Human Glioblastoma	22	NPC-like	ScType+ACT	Oligodendrocyte precursor cell	1
Human Glioblastoma	22	NPC-like	CASSIA	cortical glutamatergic projection neuron (pyramidal)	0
Human Glioblastoma	22	NPC-like	ScType+CellMarker 2.0	Astrocyte	0
Human Glioblastoma	22	NPC-like	ScType+CMA	Neoplastic Endothelial Cell	0
Human Glioblastoma	22	NPC-like	ScType+scMarkerAgent	newly formed oligodendrocyte	1
Human Glioblastoma	22	NPC-like	ScType+scMarkerAgent+LLM	newly formed oligodendrocyte	1
Human Glioblastoma	23	DC	ScType+ACT	Type 2 conventional dendritic cell	1
Human Glioblastoma	23	DC	CASSIA	Conventional dendritic cell (cDC), CD1C⁺ conventional dendritic cell (cDC2)	1
Human Glioblastoma	23	DC	ScType+CellMarker 2.0	Conventional dendritic cell 2a(cDC2a)	1
Human Glioblastoma	23	DC	ScType+CMA	Conventional Dendritic Cell	1
Human Glioblastoma	23	DC	ScType+scMarkerAgent	cDC2/Migratory conventional dendritic cell type 2 / monocyte-derived dendritic cell	0.5
Human Glioblastoma	23	DC	ScType+scMarkerAgent+LLM	cDC2	1
Human Glioblastoma	24	TAM-MG	ScType+ACT	Homeostatic microglial cell	0.5
Human Glioblastoma	24	TAM-MG	CASSIA	CNS-resident myeloid cells, specifically microglia	1
Human Glioblastoma	24	TAM-MG	ScType+CellMarker 2.0	Microglial cell	0.5
Human Glioblastoma	24	TAM-MG	ScType+CMA	Microglia	0.5
Human Glioblastoma	24	TAM-MG	ScType+scMarkerAgent	microglia/macrophage	0.5
Human Glioblastoma	24	TAM-MG	ScType+scMarkerAgent+LLM	microglia/macrophage	0.5
Human Glioblastoma	25	CD4/CD8	ScType+ACT	Conventional dendritic cell	0
Human Glioblastoma	25	CD4/CD8	CASSIA	Cycling (G2/M–S phase) cells	0.5
Human Glioblastoma	25	CD4/CD8	ScType+CellMarker 2.0	Conventional CD8+ T cell	1
Human Glioblastoma	25	CD4/CD8	ScType+CMA	Mature T-Lymphocyte	1
Human Glioblastoma	25	CD4/CD8	ScType+scMarkerAgent	cycling glial cell	0
Human Glioblastoma	25	CD4/CD8	ScType+scMarkerAgent+LLM	cytotoxic T cell	1
Human Glioblastoma	26	Mural cell	ScType+ACT	Fibroblast	0
Human Glioblastoma	26	Mural cell	CASSIA	Perivascular mural cells	1
Human Glioblastoma	26	Mural cell	ScType+CellMarker 2.0	Fibroblast	0
Human Glioblastoma	26	Mural cell	ScType+CMA	Pericyte	1
Human Glioblastoma	26	Mural cell	ScType+scMarkerAgent	pericyte	1
Human Glioblastoma	26	Mural cell	ScType+scMarkerAgent+LLM	pericyte	1
Human Glioblastoma	27	Oligodendrocyte	ScType+ACT	Oligodendrocyte	1
Human Glioblastoma	27	Oligodendrocyte	CASSIA	Oligodendrocytes	1
Human Glioblastoma	27	Oligodendrocyte	ScType+CellMarker 2.0	Oligodendrocyte	1
Human Glioblastoma	27	Oligodendrocyte	ScType+CMA	Neoplastic Oligodendrocyte	0.5
Human Glioblastoma	27	Oligodendrocyte	ScType+scMarkerAgent	oligodendrocyte	1
Human Glioblastoma	27	Oligodendrocyte	ScType+scMarkerAgent+LLM	oligodendrocyte	1
Human Glioblastoma	28	Endothelial	ScType+ACT	Endothelial cell	1
Human Glioblastoma	28	Endothelial	CASSIA	Brain vascular endothelial cell – capillary / post-capillary venous blood–brain barrier endothelial cell.	1
Human Glioblastoma	28	Endothelial	ScType+CellMarker 2.0	Endothelial cell	1
Human Glioblastoma	28	Endothelial	ScType+CMA	Neoplastic Endothelial Cell	0.5
Human Glioblastoma	28	Endothelial	ScType+scMarkerAgent	endothelial cell	1
Human Glioblastoma	28	Endothelial	ScType+scMarkerAgent+LLM	endothelial cell	1
Human Glioblastoma	29	RG	ScType+ACT	Neuroblast (sensu Vertebrata)	1
Human Glioblastoma	29	RG	CASSIA	Cortical excitatory (glutamatergic) lineage in a neurogenic/progenitor-to-neuron transition state (immature excitatory neurons / neurogenic progenitors)	1
Human Glioblastoma	29	RG	ScType+CellMarker 2.0	Neuron	1
Human Glioblastoma	29	RG	ScType+CMA	Neuron	1
Human Glioblastoma	29	RG	ScType+scMarkerAgent	neuron	1
Human Glioblastoma	29	RG	ScType+scMarkerAgent+LLM	neuron	1
Human Glioblastoma	30	DC	ScType+ACT	B cell	0
Human Glioblastoma	30	DC	CASSIA	Plasmacytoid dendritic cells (pDCs), GZMB⁺ LAMP5⁺ activated/tissue-resident subtype	1
Human Glioblastoma	30	DC	ScType+CellMarker 2.0	B cell	0
Human Glioblastoma	30	DC	ScType+CMA	Neoplastic Plasma Cell	0
Human Glioblastoma	30	DC	ScType+scMarkerAgent	B cell	0
Human Glioblastoma	30	DC	ScType+scMarkerAgent+LLM	B cell	0
Human Glioblastoma	31	TAM-BDM	ScType+ACT	Inflammatory macrophage	0.5
Human Glioblastoma	31	TAM-BDM	CASSIA	Infiltrating inflammatory myeloid cell – monocyte-derived dendritic cell / macrophage (non-microglial myeloid cell) in brain	1
Human Glioblastoma	31	TAM-BDM	ScType+CellMarker 2.0	Microglial cell	1
Human Glioblastoma	31	TAM-BDM	ScType+CMA	Microglia	1
Human Glioblastoma	31	TAM-BDM	ScType+scMarkerAgent	activated microglia	1
Human Glioblastoma	31	TAM-BDM	ScType+scMarkerAgent+LLM	microglial cell	1
Human Glioblastoma	32	CD4/CD8	ScType+ACT	Erythrocyte	1
Human Glioblastoma	32	CD4/CD8	CASSIA	Erythroid lineage – mature circulating red blood cells (RBCs) / blood-derived contaminant in brain tissue	1
Human Glioblastoma	32	CD4/CD8	ScType+CellMarker 2.0	Unknown	0
Human Glioblastoma	32	CD4/CD8	ScType+CMA	Unknown	0
Human Glioblastoma	32	CD4/CD8	ScType+scMarkerAgent	myeloid suppressor cell	0
Human Glioblastoma	32	CD4/CD8	ScType+scMarkerAgent+LLM	Unknown	0
Human Glioblastoma	33	CD4/CD8	ScType+ACT	Endothelial cell of vascular tree	0
Human Glioblastoma	33	CD4/CD8	CASSIA	Epithelial cell – stratified squamous, carcinoma-like	1
Human Glioblastoma	33	CD4/CD8	ScType+CellMarker 2.0	B cell	0
Human Glioblastoma	33	CD4/CD8	ScType+CMA	Neoplastic Plasma Cell	0
Human Glioblastoma	33	CD4/CD8	ScType+scMarkerAgent	malignant cell	1
Human Glioblastoma	33	CD4/CD8	ScType+scMarkerAgent+LLM	vascular cell	0
Human Glioblastoma	34	Mural cell	ScType+ACT	Fibroblast	0
Human Glioblastoma	34	Mural cell	CASSIA	Brain vascular perivascular fibroblast / adventitial fibroblast (perivascular stromal cell, mural-associated).	0
Human Glioblastoma	34	Mural cell	ScType+CellMarker 2.0	Fibroblast	0
Human Glioblastoma	34	Mural cell	ScType+CMA	Cancer-Associated Fibroblast	0
Human Glioblastoma	34	Mural cell	ScType+scMarkerAgent	fibroblast	0
Human Glioblastoma	34	Mural cell	ScType+scMarkerAgent+LLM	pericyte	1
Mouse T2D	0	pancreatic A cell	ScType+ACT	Pancreatic A cell	1
Mouse T2D	0	pancreatic A cell	ScType+CellMarker 2.0	Alpha cell (α cell)	1
Mouse T2D	0	pancreatic A cell	ScType+CMA	Alpha Cell	1
Mouse T2D	0	pancreatic A cell	ScType+scMarkerAgent	pancreatic A cell	1
Mouse T2D	0	pancreatic A cell	ScType+scMarkerAgent+LLM	α-cell	1
Mouse T2D	0	pancreatic A cell	CASSIA	Pancreatic islet endocrine cell – α-cell lineage (glucagon-producing)	1
Mouse T2D	1	type B pancreatic cell	ScType+ACT	Enterochromaffin-like cell	0
Mouse T2D	1	type B pancreatic cell	ScType+CellMarker 2.0	Beta cell(β cell)	1
Mouse T2D	1	type B pancreatic cell	ScType+CMA	Beta Cell	1
Mouse T2D	1	type B pancreatic cell	ScType+scMarkerAgent	type B pancreatic cell	1
Mouse T2D	1	type B pancreatic cell	ScType+scMarkerAgent+LLM	mature β-cell	1
Mouse T2D	1	type B pancreatic cell	CASSIA	Pancreatic islet endocrine cell – β cell	1
Mouse T2D	2	pancreatic D cell	ScType+ACT	Pancreatic D cell	1
Mouse T2D	2	pancreatic D cell	ScType+CellMarker 2.0	Delta cell	1
Mouse T2D	2	pancreatic D cell	ScType+CMA	Delta Cell of the Pancreas	1
Mouse T2D	2	pancreatic D cell	ScType+scMarkerAgent	pancreatic D cell	1
Mouse T2D	2	pancreatic D cell	ScType+scMarkerAgent+LLM	pancreatic D cell	1
Mouse T2D	2	pancreatic D cell	CASSIA	Pancreatic islet endocrine δ cell, Neurog3? immature/transitional δ subtype	1
Mouse T2D	3	type B pancreatic cell	ScType+ACT	Enterochromaffin-like cell	0
Mouse T2D	3	type B pancreatic cell	ScType+CellMarker 2.0	Beta cell(β cell)	1
Mouse T2D	3	type B pancreatic cell	ScType+CMA	Beta Cell	1
Mouse T2D	3	type B pancreatic cell	ScType+scMarkerAgent	type B pancreatic cell	1
Mouse T2D	3	type B pancreatic cell	ScType+scMarkerAgent+LLM	type B pancreatic cell	1
Mouse T2D	3	type B pancreatic cell	CASSIA	Pancreatic islet β-cell – neuronal/stress-associated subcluster (Ins1?, G6pc2?, Pcsk1?, Chgb?, Prlr?, Pdyn?, Saa3?).	1
Mouse T2D	4	pancreatic A cell	ScType+ACT	Pancreatic A cell	1
Mouse T2D	4	pancreatic A cell	ScType+CellMarker 2.0	Alpha cell (α cell)	1
Mouse T2D	4	pancreatic A cell	ScType+CMA	Alpha Cell	1
Mouse T2D	4	pancreatic A cell	ScType+scMarkerAgent	pancreatic A cell	1
Mouse T2D	4	pancreatic A cell	ScType+scMarkerAgent+LLM	pancreatic A cell	1
Mouse T2D	4	pancreatic A cell	CASSIA	Pancreatic islet endocrine α-cells (Gcg? Mafb? Arx?)	1
Mouse T2D	5	hematopoietic cell	ScType+ACT	B cell	1
Mouse T2D	5	hematopoietic cell	ScType+CellMarker 2.0	B cell	1
Mouse T2D	5	hematopoietic cell	ScType+CMA	Hematopoietic and Lymphoid Cell	1
Mouse T2D	5	hematopoietic cell	ScType+scMarkerAgent	B cell	1
Mouse T2D	5	hematopoietic cell	ScType+scMarkerAgent+LLM	B cell	1
Mouse T2D	5	hematopoietic cell	CASSIA	B cell	1
Mouse T2D	6	type B pancreatic cell	ScType+ACT	Type B pancreatic cell	1
Mouse T2D	6	type B pancreatic cell	ScType+CellMarker 2.0	Beta cell(β cell)	1
Mouse T2D	6	type B pancreatic cell	ScType+CMA	Beta Cell	1
Mouse T2D	6	type B pancreatic cell	ScType+scMarkerAgent	mature β-cell	1
Mouse T2D	6	type B pancreatic cell	ScType+scMarkerAgent+LLM	mature β-cell	1
Mouse T2D	6	type B pancreatic cell	CASSIA	Pancreatic islet endocrine β-cell	1
Mouse T2D	7	pancreatic D cell	ScType+ACT	Pancreatic D cell	1
Mouse T2D	7	pancreatic D cell	ScType+CellMarker 2.0	Delta cell	1
Mouse T2D	7	pancreatic D cell	ScType+CMA	Delta Cell of the Pancreas	1
Mouse T2D	7	pancreatic D cell	ScType+scMarkerAgent	pancreatic D cell	1
Mouse T2D	7	pancreatic D cell	ScType+scMarkerAgent+LLM	pancreatic D cell	1
Mouse T2D	7	pancreatic D cell	CASSIA	Neuron (somatostatin-expressing intrapancreatic neuron; Sst+ intrapancreatic neuron)	0
Mouse T2D	8	type B pancreatic cell	ScType+ACT	Enterochromaffin-like cell	0
Mouse T2D	8	type B pancreatic cell	ScType+CellMarker 2.0	Beta cell(β cell)	1
Mouse T2D	8	type B pancreatic cell	ScType+CMA	Beta Cell	1
Mouse T2D	8	type B pancreatic cell	ScType+scMarkerAgent	type B pancreatic cell	1
Mouse T2D	8	type B pancreatic cell	ScType+scMarkerAgent+LLM	type B pancreatic cell	1
Mouse T2D	8	type B pancreatic cell	CASSIA	Pancreatic islet endocrine cell, most consistent with β-lineage (β-cell–like)	1
Mouse T2D	9	type B pancreatic cell	ScType+ACT	Type B pancreatic cell	1
Mouse T2D	9	type B pancreatic cell	ScType+CellMarker 2.0	Beta cell(β cell)	1
Mouse T2D	9	type B pancreatic cell	ScType+CMA	Beta Cell	1
Mouse T2D	9	type B pancreatic cell	ScType+scMarkerAgent	type B pancreatic cell	1
Mouse T2D	9	type B pancreatic cell	ScType+scMarkerAgent+LLM	mature β-cell	1
Mouse T2D	9	type B pancreatic cell	CASSIA	Neuroendocrine enteroendocrine-like cell	0.5
Mouse T2D	10	pancreatic endocrine cell	ScType+ACT	Pancreatic D cell	0
Mouse T2D	10	pancreatic endocrine cell	ScType+CellMarker 2.0	Pancreatic polypeptide cell	0.5
Mouse T2D	10	pancreatic endocrine cell	ScType+CMA	Delta Cell of the Pancreas	0.5
Mouse T2D	10	pancreatic endocrine cell	ScType+scMarkerAgent	endocrine cell	1
Mouse T2D	10	pancreatic endocrine cell	ScType+scMarkerAgent+LLM	mature β-cell	1
Mouse T2D	10	pancreatic endocrine cell	CASSIA	Pancreatic islet β-cell	1
Mouse T2D	11	hematopoietic cell	ScType+ACT	T cell	1
Mouse T2D	11	hematopoietic cell	ScType+CellMarker 2.0	T cell	1
Mouse T2D	11	hematopoietic cell	ScType+CMA	Hematopoietic and Lymphoid Cell	1
Mouse T2D	11	hematopoietic cell	ScType+scMarkerAgent	T cell	1
Mouse T2D	11	hematopoietic cell	ScType+scMarkerAgent+LLM	CD8 positive T cell	1
Mouse T2D	11	hematopoietic cell	CASSIA	CD8? αβ T lymphocytes (cytotoxic T cells)	1
Mouse T2D	12	endothelial cell	ScType+ACT	Endothelial cell	1
Mouse T2D	12	endothelial cell	ScType+CellMarker 2.0	Endothelial cell	1
Mouse T2D	12	endothelial cell	ScType+CMA	Endothelial Cell	1
Mouse T2D	12	endothelial cell	ScType+scMarkerAgent	endothelial cell	1
Mouse T2D	12	endothelial cell	ScType+scMarkerAgent+LLM	endothelial cell	1
Mouse T2D	12	endothelial cell	CASSIA	Vascular endothelial cells (microvascular/capillary endothelium)	1
Mouse T2D	13	pancreatic ductal cell	ScType+ACT	Epithelial cell	0.5
Mouse T2D	13	pancreatic ductal cell	ScType+CellMarker 2.0	Ductal cell	1
Mouse T2D	13	pancreatic ductal cell	ScType+CMA	Epithelial Cell	0.5
Mouse T2D	13	pancreatic ductal cell	ScType+scMarkerAgent	pancreatic ductal cell	1
Mouse T2D	13	pancreatic ductal cell	ScType+scMarkerAgent+LLM	pancreatic ductal cell	1
Mouse T2D	13	pancreatic ductal cell	CASSIA	Epithelial ductal cells – specifically pancreatic ductal epithelium / cholangiocyte-like duct epithelium	1
Mouse T2D	14	pancreatic stellate cell	ScType+ACT	Fibroblast	0.5
Mouse T2D	14	pancreatic stellate cell	ScType+CellMarker 2.0	Fibroblast	0.5
Mouse T2D	14	pancreatic stellate cell	ScType+CMA	Pancreatic Stellate Cell	1
Mouse T2D	14	pancreatic stellate cell	ScType+scMarkerAgent	mesenchymal cell	0.5
Mouse T2D	14	pancreatic stellate cell	ScType+scMarkerAgent+LLM	pancreatic stellate cell	1
Mouse T2D	14	pancreatic stellate cell	CASSIA	Fibroblast / pancreatic stellate cell (stromal mesenchymal cell)	1
Mouse T2D	15	type B pancreatic cell	ScType+ACT	Type B pancreatic cell	1
Mouse T2D	15	type B pancreatic cell	ScType+CellMarker 2.0	Beta cell(β cell)	1
Mouse T2D	15	type B pancreatic cell	ScType+CMA	Beta Cell	1
Mouse T2D	15	type B pancreatic cell	ScType+scMarkerAgent	mature β-cell	1
Mouse T2D	15	type B pancreatic cell	ScType+scMarkerAgent+LLM	mature β-cell	1
Mouse T2D	15	type B pancreatic cell	CASSIA	Pancreatic islet β cells	1
Mouse T2D	16	pancreatic PP cell	ScType+ACT	Pancreatic PP cell	1
Mouse T2D	16	pancreatic PP cell	ScType+CellMarker 2.0	Pancreatic polypeptide cell	1
Mouse T2D	16	pancreatic PP cell	ScType+CMA	Alpha Cell	0
Mouse T2D	16	pancreatic PP cell	ScType+scMarkerAgent	pancreatic polypeptide-lineage beta cell	0.5
Mouse T2D	16	pancreatic PP cell	ScType+scMarkerAgent+LLM	pancreatic PP cell	1
Mouse T2D	16	pancreatic PP cell	CASSIA	Pancreatic endocrine islet cell (neuroendocrine)	0.5
Mouse T2D	17	hematopoietic cell	ScType+ACT	B cell	1
Mouse T2D	17	hematopoietic cell	ScType+CellMarker 2.0	B cell	1
Mouse T2D	17	hematopoietic cell	ScType+CMA	Hematopoietic and Lymphoid Cell	1
Mouse T2D	17	hematopoietic cell	ScType+scMarkerAgent	B cell	1
Mouse T2D	17	hematopoietic cell	ScType+scMarkerAgent+LLM	B cell	1
Mouse T2D	17	hematopoietic cell	CASSIA	B cells (conventional B lymphocytes)	1
Mouse T2D	18	hematopoietic cell	ScType+ACT	T cell	1
Mouse T2D	18	hematopoietic cell	ScType+CellMarker 2.0	T cell	1
Mouse T2D	18	hematopoietic cell	ScType+CMA	Hematopoietic and Lymphoid Cell	1
Mouse T2D	18	hematopoietic cell	ScType+scMarkerAgent	anergic CD4 T cell	0.5
Mouse T2D	18	hematopoietic cell	ScType+scMarkerAgent+LLM	regulatory T cell	1
Mouse T2D	18	hematopoietic cell	CASSIA	Regulatory T cell (Treg)	1
Mouse T2D	19	pancreatic stellate cell	ScType+ACT	Myofibroblast CAF	0
Mouse T2D	19	pancreatic stellate cell	ScType+CellMarker 2.0	Myeloid derived suppressor cell (MDSC)	0
Mouse T2D	19	pancreatic stellate cell	ScType+CMA	Pancreatic Stellate Cell	0.5
Mouse T2D	19	pancreatic stellate cell	ScType+scMarkerAgent	quiescent stellate cell	0.5
Mouse T2D	19	pancreatic stellate cell	ScType+scMarkerAgent+LLM	smooth muscle cell	1
Mouse T2D	19	pancreatic stellate cell	CASSIA	Pancreatic vascular smooth muscle cells (mural cells, VSMCs)	1
Mouse T2D	20	hematopoietic cell	ScType+ACT	Macrophage	1
Mouse T2D	20	hematopoietic cell	ScType+CellMarker 2.0	Myeloid cell	1
Mouse T2D	20	hematopoietic cell	ScType+CMA	Hematopoietic and Lymphoid Cell	0.5
Mouse T2D	20	hematopoietic cell	ScType+scMarkerAgent	macrophage	1
Mouse T2D	20	hematopoietic cell	ScType+scMarkerAgent+LLM	macrophage	1
Mouse T2D	20	hematopoietic cell	CASSIA	myeloid macrophage	1
Mouse T2D	21	pancreatic A cell	ScType+ACT	Acinar cell	0
Mouse T2D	21	pancreatic A cell	ScType+CellMarker 2.0	Acinar cell	0
Mouse T2D	21	pancreatic A cell	ScType+CMA	Pancreatic Acinar Cell	0
Mouse T2D	21	pancreatic A cell	ScType+scMarkerAgent	pancreatic A cell	1
Mouse T2D	21	pancreatic A cell	ScType+scMarkerAgent+LLM	pancreatic A cell	1
Mouse T2D	21	pancreatic A cell	CASSIA	Pancreatic islet endocrine cell (glucagon-producing α cell lineage)	1
Mouse T2D	22	hematopoietic cell	ScType+ACT	Dendritic cell	1
Mouse T2D	22	hematopoietic cell	ScType+CellMarker 2.0	Conventional dendritic cell 1(cDC1)	1
Mouse T2D	22	hematopoietic cell	ScType+CMA	Hematopoietic and Lymphoid Cell	0.5
Mouse T2D	22	hematopoietic cell	ScType+scMarkerAgent	leukocyte	1
Mouse T2D	22	hematopoietic cell	ScType+scMarkerAgent+LLM	dendritic cell	1
Mouse T2D	22	hematopoietic cell	CASSIA	Conventional dendritic cell (cDC), activated/migratory	1
Mouse T2D	23	hematopoietic cell	ScType+ACT	Macrophage	1
Mouse T2D	23	hematopoietic cell	ScType+CellMarker 2.0	Myeloid cell	1
Mouse T2D	23	hematopoietic cell	ScType+CMA	Hematopoietic and Lymphoid Cell	0.5
Mouse T2D	23	hematopoietic cell	ScType+scMarkerAgent	macrophage	1
Mouse T2D	23	hematopoietic cell	ScType+scMarkerAgent+LLM	macrophage	1
Mouse T2D	23	hematopoietic cell	CASSIA	Macrophage (pancreatic tissue-resident / inflammatory macrophage)	1
Mouse T2D	24	pancreatic PP cell	ScType+ACT	Pancreatic PP cell	1
Mouse T2D	24	pancreatic PP cell	ScType+CellMarker 2.0	Pancreatic polypeptide cell	1
Mouse T2D	24	pancreatic PP cell	ScType+CMA	Ductal Epithelial Cell	0
Mouse T2D	24	pancreatic PP cell	ScType+scMarkerAgent	pancreatic polypeptide-lineage beta cell	0.5
Mouse T2D	24	pancreatic PP cell	ScType+scMarkerAgent+LLM	PP cell	1
Mouse T2D	24	pancreatic PP cell	CASSIA	Pancreatic islet PP (γ) cell	1
Mouse T2D	25	pancreatic stellate cell	ScType+ACT	Fibroblast	0.5
Mouse T2D	25	pancreatic stellate cell	ScType+CellMarker 2.0	Fibroblast	0.5
Mouse T2D	25	pancreatic stellate cell	ScType+CMA	Pancreatic Stellate Cell	1
Mouse T2D	25	pancreatic stellate cell	ScType+scMarkerAgent	pancreatic stellate cell	1
Mouse T2D	25	pancreatic stellate cell	ScType+scMarkerAgent+LLM	pancreatic stellate cell	1
Mouse T2D	25	pancreatic stellate cell	CASSIA	Stromal fibroblast / mesenchymal niche cell (fibroblastic reticular / lymphoid tissue organizer-like stromal cell)	1
Mouse T2D	26	type B pancreatic cell	ScType+ACT	Acinar cell	0
Mouse T2D	26	type B pancreatic cell	ScType+CellMarker 2.0	Acinar cell	0
Mouse T2D	26	type B pancreatic cell	ScType+CMA	Pancreatic Acinar Cell	0
Mouse T2D	26	type B pancreatic cell	ScType+scMarkerAgent	type B pancreatic cell	1
Mouse T2D	26	type B pancreatic cell	ScType+scMarkerAgent+LLM	mature β-cell	1
Mouse T2D	26	type B pancreatic cell	CASSIA	Pancreatic islet β-cell	1
Mouse T2D	27	hematopoietic cell	ScType+ACT	Mast cell	0
Mouse T2D	27	hematopoietic cell	ScType+CellMarker 2.0	Naive T(Th0) cell	0.5
Mouse T2D	27	hematopoietic cell	ScType+CMA	Hematopoietic and Lymphoid Cell	1
Mouse T2D	27	hematopoietic cell	ScType+scMarkerAgent	effector memory T cells	1
Mouse T2D	27	hematopoietic cell	ScType+scMarkerAgent+LLM	T-helper 2 cell	0.5
Mouse T2D	27	hematopoietic cell	CASSIA	CD4+ Th17-like type 3 effector/memory T cells (Il23r+ Il22+ tissue-resident CD4 T cells)	1
Mouse T2D	28	pancreatic endocrine cell	ScType+ACT	Pancreatic D cell	0.5
Mouse T2D	28	pancreatic endocrine cell	ScType+CellMarker 2.0	Delta cell	0.5
Mouse T2D	28	pancreatic endocrine cell	ScType+CMA	Delta Cell of the Pancreas	0.5
Mouse T2D	28	pancreatic endocrine cell	ScType+scMarkerAgent	mature β-cell	1
Mouse T2D	28	pancreatic endocrine cell	ScType+scMarkerAgent+LLM	type B pancreatic cell	1
Mouse T2D	28	pancreatic endocrine cell	CASSIA	Peripheral neuron (nerve-associated cell) within pancreatic tissue	0
Mouse T2D	29	hematopoietic cell	ScType+ACT	T cell	1
Mouse T2D	29	hematopoietic cell	ScType+CellMarker 2.0	Activated T cell	1
Mouse T2D	29	hematopoietic cell	ScType+CMA	Hematopoietic and Lymphoid Cell	1
Mouse T2D	29	hematopoietic cell	ScType+scMarkerAgent	natural killer cell	0.5
Mouse T2D	29	hematopoietic cell	ScType+scMarkerAgent+LLM	T cell	1
Mouse T2D	29	hematopoietic cell	CASSIA	GATA3+ RORA+ IL7R+ ILC2?like type?2 innate lymphoid/T cells (pancreatic tissue-resident ILC2/Th2-like lymphocytes).	0.5
Mouse T2D	30	pancreatic ductal cell	ScType+ACT	Ductal cell	1
Mouse T2D	30	pancreatic ductal cell	ScType+CellMarker 2.0	Ductal cell	1
Mouse T2D	30	pancreatic ductal cell	ScType+CMA	Epithelial Cell	0.5
Mouse T2D	30	pancreatic ductal cell	ScType+scMarkerAgent	duct epithelial cell	1
Mouse T2D	30	pancreatic ductal cell	ScType+scMarkerAgent+LLM	duct epithelial cell	1
Mouse T2D	30	pancreatic ductal cell	CASSIA	Gastric mucosal epithelial cells (non-pancreatic contaminant), specifically mucus-secreting gastric epithelial cells	0
Mouse T2D	31	hematopoietic cell	ScType+ACT	B cell	1
Mouse T2D	31	hematopoietic cell	ScType+CellMarker 2.0	Early plasma cell	1
Mouse T2D	31	hematopoietic cell	ScType+CMA	Hematopoietic and Lymphoid Cell	1
Mouse T2D	31	hematopoietic cell	ScType+scMarkerAgent	Mki67-positive beta cell	0
Mouse T2D	31	hematopoietic cell	ScType+scMarkerAgent+LLM	B cell	1
Mouse T2D	31	hematopoietic cell	CASSIA	B lymphocyte	1
Mouse T2D	32	hematopoietic cell	ScType+ACT	B cell	1
Mouse T2D	32	hematopoietic cell	ScType+CellMarker 2.0	Early plasma cell	1
Mouse T2D	32	hematopoietic cell	ScType+CMA	Hematopoietic and Lymphoid Cell	1
Mouse T2D	32	hematopoietic cell	ScType+scMarkerAgent	plasma cell	1
Mouse T2D	32	hematopoietic cell	ScType+scMarkerAgent+LLM	plasma cell	1
Mouse T2D	32	hematopoietic cell	CASSIA	B lineage antibody-secreting cell (plasma cell / plasmablast)	1
Mouse T2D	33	hematopoietic cell	ScType+ACT	Inflammatory macrophage	0
Mouse T2D	33	hematopoietic cell	ScType+CellMarker 2.0	Conventional dendritic cell 1(cDC1)	1
Mouse T2D	33	hematopoietic cell	ScType+CMA	Hematopoietic and Lymphoid Cell	0.5
Mouse T2D	33	hematopoietic cell	ScType+scMarkerAgent	CD103-positive dendritic cell	1
Mouse T2D	33	hematopoietic cell	ScType+scMarkerAgent+LLM	CD103-positive dendritic cell	1
Mouse T2D	33	hematopoietic cell	CASSIA	Conventional dendritic cell 1 (cDC1)	1
Mouse T2D	34	pancreatic acinar cell	ScType+ACT	Acinar cell	1
Mouse T2D	34	pancreatic acinar cell	ScType+CellMarker 2.0	Acinar cell	1
Mouse T2D	34	pancreatic acinar cell	ScType+CMA	Pancreatic Acinar Cell	1
Mouse T2D	34	pancreatic acinar cell	ScType+scMarkerAgent	acinar cell	1
Mouse T2D	34	pancreatic acinar cell	ScType+scMarkerAgent+LLM	acinar cell	1
Mouse T2D	34	pancreatic acinar cell	CASSIA	Pancreatic exocrine acinar cell	1
Mouse T2D	35	pancreatic endocrine cell	ScType+ACT	Enterochromaffin-like cell	0
Mouse T2D	35	pancreatic endocrine cell	ScType+CellMarker 2.0	Beta cell(β cell)	1
Mouse T2D	35	pancreatic endocrine cell	ScType+CMA	Beta Cell	1
Mouse T2D	35	pancreatic endocrine cell	ScType+scMarkerAgent	Mki67-positive beta cell	1
Mouse T2D	35	pancreatic endocrine cell	ScType+scMarkerAgent+LLM	type B pancreatic cell	1
Mouse T2D	35	pancreatic endocrine cell	CASSIA	Proliferating/cycling cells (G2/M-phase)	0.5
Mouse T2D	36	endothelial cell	ScType+ACT	Endothelial cell	1
Mouse T2D	36	endothelial cell	ScType+CellMarker 2.0	Endothelial cell	1
Mouse T2D	36	endothelial cell	ScType+CMA	Endothelial Cell	1
Mouse T2D	36	endothelial cell	ScType+scMarkerAgent	endothelial cell	1
Mouse T2D	36	endothelial cell	ScType+scMarkerAgent+LLM	endothelial cell	1
Mouse T2D	36	endothelial cell	CASSIA	Vascular endothelial cell	1
Mouse T2D	37	endothelial cell	ScType+ACT	Endothelial cell	1
Mouse T2D	37	endothelial cell	ScType+CellMarker 2.0	Endothelial cell	1
Mouse T2D	37	endothelial cell	ScType+CMA	Endothelial Cell	1
Mouse T2D	37	endothelial cell	ScType+scMarkerAgent	endothelial cell	1
Mouse T2D	37	endothelial cell	ScType+scMarkerAgent+LLM	endothelial cell	1
Mouse T2D	37	endothelial cell	CASSIA	High endothelial venule (HEV)-like endothelial cell (lymphocyte-homing venular endothelial cell) in pancreas.	1
Mouse T2D	38	Schwann cell	ScType+ACT	Mesenchymal cell	0
Mouse T2D	38	Schwann cell	ScType+CellMarker 2.0	Fibroblast	0
Mouse T2D	38	Schwann cell	ScType+CMA	Schwann Cell	1
Mouse T2D	38	Schwann cell	ScType+scMarkerAgent	Gpr37I1 positive stellate cell	0
Mouse T2D	38	Schwann cell	ScType+scMarkerAgent+LLM	pancreatic stellate cell	0
Mouse T2D	38	Schwann cell	CASSIA	Peripheral glia / Schwann cells	1
Mouse T2D	39	endothelial cell	ScType+ACT	Endothelial cell	1
Mouse T2D	39	endothelial cell	ScType+CellMarker 2.0	Endothelial cell	1
Mouse T2D	39	endothelial cell	ScType+CMA	Endothelial Cell	1
Mouse T2D	39	endothelial cell	ScType+scMarkerAgent	endothelial cell	1
Mouse T2D	39	endothelial cell	ScType+scMarkerAgent+LLM	endothelial cell	1
Mouse T2D	39	endothelial cell	CASSIA	Vascular endothelial cell	1
Mouse T2D	40	hematopoietic cell	ScType+ACT	T cell	1
Mouse T2D	40	hematopoietic cell	ScType+CellMarker 2.0	T cell	1
Mouse T2D	40	hematopoietic cell	ScType+CMA	Hematopoietic and Lymphoid Cell	1
Mouse T2D	40	hematopoietic cell	ScType+scMarkerAgent	Mki67-positive beta cell	0
Mouse T2D	40	hematopoietic cell	ScType+scMarkerAgent+LLM	T cell	1
Mouse T2D	40	hematopoietic cell	CASSIA	Cycling/proliferating pancreatic cells (G2/M-enriched)	0
Mouse T2D	41	hematopoietic cell	ScType+ACT	T cell	0.5
Mouse T2D	41	hematopoietic cell	ScType+CellMarker 2.0	T cell	0.5
Mouse T2D	41	hematopoietic cell	ScType+CMA	Hematopoietic and Lymphoid Cell	1
Mouse T2D	41	hematopoietic cell	ScType+scMarkerAgent	T cell	0.5
Mouse T2D	41	hematopoietic cell	ScType+scMarkerAgent+LLM	T cell	1
Mouse T2D	41	hematopoietic cell	CASSIA	T cell (CD4 T lymphocyte, T follicular helper (Tfh) cell)	0.5
Mouse T2D	42	pancreatic A cell	ScType+ACT	T cell	0.5
Mouse T2D	42	pancreatic A cell	ScType+CellMarker 2.0	T cell	0.5
Mouse T2D	42	pancreatic A cell	ScType+CMA	Delta Cell of the Pancreas	0.5
Mouse T2D	42	pancreatic A cell	ScType+scMarkerAgent	immature β-cell	0
Mouse T2D	42	pancreatic A cell	ScType+scMarkerAgent+LLM	pancreatic A cell	0.5
Mouse T2D	42	pancreatic A cell	CASSIA	Conventional αβ T lymphocyte (activated effector/memory T cell in pancreas)	0.5
Rat Lung	0	alveolar macrophage	ScType+scMarkerAgent	alveolar macrophage	1
Rat Lung	0	alveolar macrophage	ScType+scMarkerAgent+LLM	alveolar macrophage	1
Rat Lung	1	naive T cell	ScType+scMarkerAgent	T cell	1
Rat Lung	1	naive T cell	ScType+scMarkerAgent+LLM	T cell	1
Rat Lung	2	type I NK T cell	ScType+scMarkerAgent	natural killer cell	1
Rat Lung	2	type I NK T cell	ScType+scMarkerAgent+LLM	natural killer cell	1
Rat Lung	3	B cell	ScType+scMarkerAgent	B cell	1
Rat Lung	3	B cell	ScType+scMarkerAgent+LLM	B cell	1
Rat Lung	4	non-classical monocyte	ScType+scMarkerAgent	neutrophil	0
Rat Lung	4	non-classical monocyte	ScType+scMarkerAgent+LLM	neutrophil	0
Rat Lung	5	neutrophil	ScType+scMarkerAgent	neutrophil	1
Rat Lung	5	neutrophil	ScType+scMarkerAgent+LLM	neutrophil	1
Rat Lung	6	classical monocyte	ScType+scMarkerAgent	monocyte	1
Rat Lung	6	classical monocyte	ScType+scMarkerAgent+LLM	monocyte	1
Rat Lung	7	alveolar macrophage	ScType+scMarkerAgent	alveolar macrophage	1
Rat Lung	7	alveolar macrophage	ScType+scMarkerAgent+LLM	alveolar macrophage	1
Rat Lung	8	endothelial cell of lymphatic vessel	ScType+scMarkerAgent	endothelial cell	1
Rat Lung	8	endothelial cell of lymphatic vessel	ScType+scMarkerAgent+LLM	endothelial cell	1
Rat Lung	9	club cell	ScType+scMarkerAgent	pulmonary alveolar type 2 cell	1
Rat Lung	9	club cell	ScType+scMarkerAgent+LLM	pulmonary alveolar type 2 cell	1
Rat Lung	10	lung macrophage	ScType+scMarkerAgent	alveolar macrophage	1
Rat Lung	10	lung macrophage	ScType+scMarkerAgent+LLM	alveolar macrophage	1
Rat Lung	11	T cell	ScType+scMarkerAgent	CD8-positive T cell	1
Rat Lung	11	T cell	ScType+scMarkerAgent+LLM	CD8-positive T cell	1
Rat Lung	12	fibroblast of lung	ScType+scMarkerAgent	mesenchymal cell	0.5
Rat Lung	12	fibroblast of lung	ScType+scMarkerAgent+LLM	fibroblast	1
Rat Lung	13	alveolar macrophage	ScType+scMarkerAgent	pulmonary alveolar type 1 cell	1
Rat Lung	13	alveolar macrophage	ScType+scMarkerAgent+LLM	pulmonary alveolar type 1 cell	1
Rat Lung	14	ciliated cell	ScType+scMarkerAgent	bronchioalveolar stem cell	0
Rat Lung	14	ciliated cell	ScType+scMarkerAgent+LLM	bronchioalveolar stem cell	0

## Sheet: S3
Comparison of annotation and scoring results across six frameworks for brain spatial transcriptomics data
cluster:	Cluster ID after Seurat preprocessing.
marker:	Significantly differentially expressed genes in the cluster
ground_truth:	Cell type names annotated by the authors or experts.
framework:	The annotation frameworks.
annotation:	Cell-type annotation results based on the framework.
score:	assigned as 1, 0.5, or 0 when the annotation is fully matched, partially matched, or not matched, respectively.
cluster	markers	ground_truth	framework	annotation	score
0	Mobp,Cldn11,Mag,Mog,Hapln2,Klk6,Opalin,Mal,Enpp6,Apod,Gsn,Trf,Lyz2,Depp1,Tnfaip6,Mrc1,Enpp2,Lum,Ms4a6d,Cnp,Lcn2,Pf4,Cldn2,Sept4,Ms4a7,Plp1	Oligodendrocytes_1	ScType+ACT	Oligodendrocyte	1
0	Mobp,Cldn11,Mag,Mog,Hapln2,Klk6,Opalin,Mal,Enpp6,Apod,Gsn,Trf,Lyz2,Depp1,Tnfaip6,Mrc1,Enpp2,Lum,Ms4a6d,Cnp,Lcn2,Pf4,Cldn2,Sept4,Ms4a7,Plp1	Oligodendrocytes_1	ScType+CellMarker 2.0	Oligodendrocyte	1
0	Mobp,Cldn11,Mag,Mog,Hapln2,Klk6,Opalin,Mal,Enpp6,Apod,Gsn,Trf,Lyz2,Depp1,Tnfaip6,Mrc1,Enpp2,Lum,Ms4a6d,Cnp,Lcn2,Pf4,Cldn2,Sept4,Ms4a7,Plp1	Oligodendrocytes_1	ScType+CMA	macroglial cell	0.5
0	Mobp,Cldn11,Mag,Mog,Hapln2,Klk6,Opalin,Mal,Enpp6,Apod,Gsn,Trf,Lyz2,Depp1,Tnfaip6,Mrc1,Enpp2,Lum,Ms4a6d,Cnp,Lcn2,Pf4,Cldn2,Sept4,Ms4a7,Plp1	Oligodendrocytes_1	ScType+scMarkerAgent	oligodendrocyte	1
0	Mobp,Cldn11,Mag,Mog,Hapln2,Klk6,Opalin,Mal,Enpp6,Apod,Gsn,Trf,Lyz2,Depp1,Tnfaip6,Mrc1,Enpp2,Lum,Ms4a6d,Cnp,Lcn2,Pf4,Cldn2,Sept4,Ms4a7,Plp1	Oligodendrocytes_1	ScType+scMarkerAgent+LLM	mature myelinating oligodendrocyte	1
0	Mobp,Cldn11,Mag,Mog,Hapln2,Klk6,Opalin,Mal,Enpp6,Apod,Gsn,Trf,Lyz2,Depp1,Tnfaip6,Mrc1,Enpp2,Lum,Ms4a6d,Cnp,Lcn2,Pf4,Cldn2,Sept4,Ms4a7,Plp1	Oligodendrocytes_1	CASSIA	oligodendrocyte (mature, myelinating)	1
1	Slc30a3,Dkkl1,Nptx1,Nrn1,Ackr1,Cnr1,Fos,Enpp2,Rbfox3,Dusp1,Syne1	Neuron_Slc30a3	ScType+ACT	Brain capillary endothelial cell	0
1	Slc30a3,Dkkl1,Nptx1,Nrn1,Ackr1,Cnr1,Fos,Enpp2,Rbfox3,Dusp1,Syne1	Neuron_Slc30a3	ScType+CellMarker 2.0	Martinotti cell	0
1	Slc30a3,Dkkl1,Nptx1,Nrn1,Ackr1,Cnr1,Fos,Enpp2,Rbfox3,Dusp1,Syne1	Neuron_Slc30a3	ScType+CMA	L2/3-6 intratelencephalic projecting glutamatergic neuron/L4/5 intratelencephalic projecting glutamatergic neuron/L4/5 intratelencephalic projecting glutamatergic neuron of the primary motor cortex/L6 intratelencephalic projecting glutamatergic neuron of the primary motor cortex/pyramidal neuron	1
1	Slc30a3,Dkkl1,Nptx1,Nrn1,Ackr1,Cnr1,Fos,Enpp2,Rbfox3,Dusp1,Syne1	Neuron_Slc30a3	ScType+scMarkerAgent	glutamatergic neuron	1
1	Slc30a3,Dkkl1,Nptx1,Nrn1,Ackr1,Cnr1,Fos,Enpp2,Rbfox3,Dusp1,Syne1	Neuron_Slc30a3	ScType+scMarkerAgent+LLM	glutamatergic neuron	1
1	Slc30a3,Dkkl1,Nptx1,Nrn1,Ackr1,Cnr1,Fos,Enpp2,Rbfox3,Dusp1,Syne1	Neuron_Slc30a3	CASSIA	Excitatory (glutamatergic) neuron	1
2	Aldh1l1,Sox6,Mfge8,Gja1,Il1a,Utp14b,Slc1a3,Tnfaip6,Gfap,Aldoc,Igfbp2,Clu	Astrocytes	ScType+ACT	Astrocyte	1
2	Aldh1l1,Sox6,Mfge8,Gja1,Il1a,Utp14b,Slc1a3,Tnfaip6,Gfap,Aldoc,Igfbp2,Clu	Astrocytes	ScType+CellMarker 2.0	Quiescent neural stem cell	0.5
2	Aldh1l1,Sox6,Mfge8,Gja1,Il1a,Utp14b,Slc1a3,Tnfaip6,Gfap,Aldoc,Igfbp2,Clu	Astrocytes	ScType+CMA	neural stem cell	0
2	Aldh1l1,Sox6,Mfge8,Gja1,Il1a,Utp14b,Slc1a3,Tnfaip6,Gfap,Aldoc,Igfbp2,Clu	Astrocytes	ScType+scMarkerAgent	astrocyte	1
2	Aldh1l1,Sox6,Mfge8,Gja1,Il1a,Utp14b,Slc1a3,Tnfaip6,Gfap,Aldoc,Igfbp2,Clu	Astrocytes	ScType+scMarkerAgent+LLM	astrocyte	1
2	Aldh1l1,Sox6,Mfge8,Gja1,Il1a,Utp14b,Slc1a3,Tnfaip6,Gfap,Aldoc,Igfbp2,Clu	Astrocytes	CASSIA	Astrocyte (CNS parenchymal astroglia)	1
3	Cldn5,Flt1,Ly6a,Pglyrp1,Itih5,Itm2a,Rgs5,Car4,Slc38a5,Slc2a1,Myl9,Tmem252,Bgn,Vtn,Crip1,Cspg4,Depp1	Endothelial Cells	ScType+ACT	Endothelial cell	1
3	Cldn5,Flt1,Ly6a,Pglyrp1,Itih5,Itm2a,Rgs5,Car4,Slc38a5,Slc2a1,Myl9,Tmem252,Bgn,Vtn,Crip1,Cspg4,Depp1	Endothelial Cells	ScType+CellMarker 2.0	Endothelial cell	1
3	Cldn5,Flt1,Ly6a,Pglyrp1,Itih5,Itm2a,Rgs5,Car4,Slc38a5,Slc2a1,Myl9,Tmem252,Bgn,Vtn,Crip1,Cspg4,Depp1	Endothelial Cells	ScType+CMA	blood vessel endothelial cell	1
3	Cldn5,Flt1,Ly6a,Pglyrp1,Itih5,Itm2a,Rgs5,Car4,Slc38a5,Slc2a1,Myl9,Tmem252,Bgn,Vtn,Crip1,Cspg4,Depp1	Endothelial Cells	ScType+scMarkerAgent	brain microvascular endothelial cell	1
3	Cldn5,Flt1,Ly6a,Pglyrp1,Itih5,Itm2a,Rgs5,Car4,Slc38a5,Slc2a1,Myl9,Tmem252,Bgn,Vtn,Crip1,Cspg4,Depp1	Endothelial Cells	ScType+scMarkerAgent+LLM	endothelial cell	1
3	Cldn5,Flt1,Ly6a,Pglyrp1,Itih5,Itm2a,Rgs5,Car4,Slc38a5,Slc2a1,Myl9,Tmem252,Bgn,Vtn,Crip1,Cspg4,Depp1	Endothelial Cells	CASSIA	Brain vascular endothelial cell (Car4+ capillary blood–brain barrier endothelial cell, activated, with pericyte contamination)	1
4	Baiap3,Ngb,Cd83,Qpct,Ass1,Otof,Lhfpl3,Rrad,Sv2c,Tshz2,Prlr,Chodl,Cdo1,Six3,Tacr1,Tac1,Cartpt,Tac2	Neuron_Baip3	ScType+ACT	Neuron	0.5
4	Baiap3,Ngb,Cd83,Qpct,Ass1,Otof,Lhfpl3,Rrad,Sv2c,Tshz2,Prlr,Chodl,Cdo1,Six3,Tacr1,Tac1,Cartpt,Tac2	Neuron_Baip3	ScType+CellMarker 2.0	Type I spiral ganglion neuron	0
4	Baiap3,Ngb,Cd83,Qpct,Ass1,Otof,Lhfpl3,Rrad,Sv2c,Tshz2,Prlr,Chodl,Cdo1,Six3,Tacr1,Tac1,Cartpt,Tac2	Neuron_Baip3	ScType+CMA	L5/6 near-projecting glutamatergic neuron	1
4	Baiap3,Ngb,Cd83,Qpct,Ass1,Otof,Lhfpl3,Rrad,Sv2c,Tshz2,Prlr,Chodl,Cdo1,Six3,Tacr1,Tac1,Cartpt,Tac2	Neuron_Baip3	ScType+scMarkerAgent	amygdala pyramidal neuron/anterior radial domain	0
4	Baiap3,Ngb,Cd83,Qpct,Ass1,Otof,Lhfpl3,Rrad,Sv2c,Tshz2,Prlr,Chodl,Cdo1,Six3,Tacr1,Tac1,Cartpt,Tac2	Neuron_Baip3	ScType+scMarkerAgent+LLM	Tacr1 neuron	1
4	Baiap3,Ngb,Cd83,Qpct,Ass1,Otof,Lhfpl3,Rrad,Sv2c,Tshz2,Prlr,Chodl,Cdo1,Six3,Tacr1,Tac1,Cartpt,Tac2	Neuron_Baip3	CASSIA	Tac2/Tac1^hi Cartpt^+ Prlr^+ Six3^+ inhibitory neuromodulatory neurons of ventral forebrain/hypothalamus	0.5
5	Six3,Sv2c,Tac1,Gpr88,Penk,Otof,Crym,Cdo1,Slc6a13,Cxcl2,Cartpt	Neuron_Gpr88	ScType+ACT	Mature granule cell	0
5	Six3,Sv2c,Tac1,Gpr88,Penk,Otof,Crym,Cdo1,Slc6a13,Cxcl2,Cartpt	Neuron_Gpr88	ScType+CellMarker 2.0	Cortex layer 6 pyramidal cell/Thalamic interneuron	0
5	Six3,Sv2c,Tac1,Gpr88,Penk,Otof,Crym,Cdo1,Slc6a13,Cxcl2,Cartpt	Neuron_Gpr88	ScType+CMA	neuroblast (sensu Vertebrata)	0
5	Six3,Sv2c,Tac1,Gpr88,Penk,Otof,Crym,Cdo1,Slc6a13,Cxcl2,Cartpt	Neuron_Gpr88	ScType+scMarkerAgent	medium spiny neuron	1
5	Six3,Sv2c,Tac1,Gpr88,Penk,Otof,Crym,Cdo1,Slc6a13,Cxcl2,Cartpt	Neuron_Gpr88	ScType+scMarkerAgent+LLM	medium spiny neuron	1
5	Six3,Sv2c,Tac1,Gpr88,Penk,Otof,Crym,Cdo1,Slc6a13,Cxcl2,Cartpt	Neuron_Gpr88	CASSIA	GABAergic striatal medium spiny neuron (MSN), basal ganglia projection neuron.	1
6	Arhgap25,Rprm,Crym,Nptx1,Islr,Grp,Fos,Rbfox3,Cidea	Neuron_Arhgap25	ScType+ACT	Tanycyte	0
6	Arhgap25,Rprm,Crym,Nptx1,Islr,Grp,Fos,Rbfox3,Cidea	Neuron_Arhgap25	ScType+CellMarker 2.0	Interneuron-selective cell	0
6	Arhgap25,Rprm,Crym,Nptx1,Islr,Grp,Fos,Rbfox3,Cidea	Neuron_Arhgap25	ScType+CMA	hippocampal pyramidal neuron	0.5
6	Arhgap25,Rprm,Crym,Nptx1,Islr,Grp,Fos,Rbfox3,Cidea	Neuron_Arhgap25	ScType+scMarkerAgent	L6 corticothalamic-projecting glutamatergic cortical neuron	1
6	Arhgap25,Rprm,Crym,Nptx1,Islr,Grp,Fos,Rbfox3,Cidea	Neuron_Arhgap25	ScType+scMarkerAgent+LLM	L6 corticothalamic-projecting glutamatergic cortical neuron	1
6	Arhgap25,Rprm,Crym,Nptx1,Islr,Grp,Fos,Rbfox3,Cidea	Neuron_Arhgap25	CASSIA	Excitatory (glutamatergic) neuron	0.5
7	Vipr2,Fbln5,Lhfpl3,Cd83,Tshz2,Nrn1,Car4,Dusp1,Abhd6,Ass1,Pvalb,Rbm3,Pdlim3,Rnf122,Prlr,Syne1,Cntn1,Tubb4a	Neuron_Lhfpl3	ScType+ACT	Endothelial cell of artery	0
7	Vipr2,Fbln5,Lhfpl3,Cd83,Tshz2,Nrn1,Car4,Dusp1,Abhd6,Ass1,Pvalb,Rbm3,Pdlim3,Rnf122,Prlr,Syne1,Cntn1,Tubb4a	Neuron_Lhfpl3	ScType+CellMarker 2.0	Chandelier cell	1
7	Vipr2,Fbln5,Lhfpl3,Cd83,Tshz2,Nrn1,Car4,Dusp1,Abhd6,Ass1,Pvalb,Rbm3,Pdlim3,Rnf122,Prlr,Syne1,Cntn1,Tubb4a	Neuron_Lhfpl3	ScType+CMA	L2/3 intratelencephalic projecting glutamatergic neuron	0
7	Vipr2,Fbln5,Lhfpl3,Cd83,Tshz2,Nrn1,Car4,Dusp1,Abhd6,Ass1,Pvalb,Rbm3,Pdlim3,Rnf122,Prlr,Syne1,Cntn1,Tubb4a	Neuron_Lhfpl3	ScType+scMarkerAgent	undetermined progenitors (Type 2a)	0
7	Vipr2,Fbln5,Lhfpl3,Cd83,Tshz2,Nrn1,Car4,Dusp1,Abhd6,Ass1,Pvalb,Rbm3,Pdlim3,Rnf122,Prlr,Syne1,Cntn1,Tubb4a	Neuron_Lhfpl3	ScType+scMarkerAgent+LLM	chandelier cell	1
7	Vipr2,Fbln5,Lhfpl3,Cd83,Tshz2,Nrn1,Car4,Dusp1,Abhd6,Ass1,Pvalb,Rbm3,Pdlim3,Rnf122,Prlr,Syne1,Cntn1,Tubb4a	Neuron_Lhfpl3	CASSIA	GABAergic interneuron – Pvalb class interneuron	1
8	Serping1,Bgn,Dcn,Pcolce,Fmod,Apod,Vtn,Igfbp2,Islr,Myl9,Itih5,Myoc,Fbln5,Cldn5,Ptgds,Slc6a13,Flt1,Gsn,Crip1,Ly6a,Mgp,Pdlim3,Ecrg4,Acta2,Lbp,Cspg4,Gfap,Spp1,Mrc1,Tfcp2l1,Rgs5,Slc2a1	Vascular leptomeningeal cells	ScType+ACT	Pericyte	0.5
8	Serping1,Bgn,Dcn,Pcolce,Fmod,Apod,Vtn,Igfbp2,Islr,Myl9,Itih5,Myoc,Fbln5,Cldn5,Ptgds,Slc6a13,Flt1,Gsn,Crip1,Ly6a,Mgp,Pdlim3,Ecrg4,Acta2,Lbp,Cspg4,Gfap,Spp1,Mrc1,Tfcp2l1,Rgs5,Slc2a1	Vascular leptomeningeal cells	ScType+CellMarker 2.0	Mural cell	1
8	Serping1,Bgn,Dcn,Pcolce,Fmod,Apod,Vtn,Igfbp2,Islr,Myl9,Itih5,Myoc,Fbln5,Cldn5,Ptgds,Slc6a13,Flt1,Gsn,Crip1,Ly6a,Mgp,Pdlim3,Ecrg4,Acta2,Lbp,Cspg4,Gfap,Spp1,Mrc1,Tfcp2l1,Rgs5,Slc2a1	Vascular leptomeningeal cells	ScType+CMA	vascular leptomeningeal cell	0.5
8	Serping1,Bgn,Dcn,Pcolce,Fmod,Apod,Vtn,Igfbp2,Islr,Myl9,Itih5,Myoc,Fbln5,Cldn5,Ptgds,Slc6a13,Flt1,Gsn,Crip1,Ly6a,Mgp,Pdlim3,Ecrg4,Acta2,Lbp,Cspg4,Gfap,Spp1,Mrc1,Tfcp2l1,Rgs5,Slc2a1	Vascular leptomeningeal cells	ScType+scMarkerAgent	vascular leptomeningeal cell	0.5
8	Serping1,Bgn,Dcn,Pcolce,Fmod,Apod,Vtn,Igfbp2,Islr,Myl9,Itih5,Myoc,Fbln5,Cldn5,Ptgds,Slc6a13,Flt1,Gsn,Crip1,Ly6a,Mgp,Pdlim3,Ecrg4,Acta2,Lbp,Cspg4,Gfap,Spp1,Mrc1,Tfcp2l1,Rgs5,Slc2a1	Vascular leptomeningeal cells	ScType+scMarkerAgent+LLM	mural cell	1
8	Serping1,Bgn,Dcn,Pcolce,Fmod,Apod,Vtn,Igfbp2,Islr,Myl9,Itih5,Myoc,Fbln5,Cldn5,Ptgds,Slc6a13,Flt1,Gsn,Crip1,Ly6a,Mgp,Pdlim3,Ecrg4,Acta2,Lbp,Cspg4,Gfap,Spp1,Mrc1,Tfcp2l1,Rgs5,Slc2a1	Vascular leptomeningeal cells	CASSIA	Vascular & leptomeningeal stromal cell	0.5
9	Slc30a3,Rprm,Crym,Ackr1,Nptx1,Nrn1,Cnr1,Dkkl1,Rbfox3,Cartpt,Syne1	Neuron_Rprm	ScType+ACT	Tanycyte	0
9	Slc30a3,Rprm,Crym,Ackr1,Nptx1,Nrn1,Cnr1,Dkkl1,Rbfox3,Cartpt,Syne1	Neuron_Rprm	ScType+CellMarker 2.0	Martinotti cell	0
9	Slc30a3,Rprm,Crym,Ackr1,Nptx1,Nrn1,Cnr1,Dkkl1,Rbfox3,Cartpt,Syne1	Neuron_Rprm	ScType+CMA	hippocampal pyramidal neuron	0.5
9	Slc30a3,Rprm,Crym,Ackr1,Nptx1,Nrn1,Cnr1,Dkkl1,Rbfox3,Cartpt,Syne1	Neuron_Rprm	ScType+scMarkerAgent	neuron	0.5
9	Slc30a3,Rprm,Crym,Ackr1,Nptx1,Nrn1,Cnr1,Dkkl1,Rbfox3,Cartpt,Syne1	Neuron_Rprm	ScType+scMarkerAgent+LLM	glutamatergic neuron	1
9	Slc30a3,Rprm,Crym,Ackr1,Nptx1,Nrn1,Cnr1,Dkkl1,Rbfox3,Cartpt,Syne1	Neuron_Rprm	CASSIA	Glutamatergic excitatory neuron (pyramidal-like principal neuron)	1
10	Cspg4,C1ql1,Pdgfra,Sox6,Lhfpl3,Qpct,Cdo1,Olig1,Rnf122	OPCs	ScType+ACT	Oligodendrocyte precursor cell	1
10	Cspg4,C1ql1,Pdgfra,Sox6,Lhfpl3,Qpct,Cdo1,Olig1,Rnf122	OPCs	ScType+CellMarker 2.0	Oligodendrocyte precursor cell	1
10	Cspg4,C1ql1,Pdgfra,Sox6,Lhfpl3,Qpct,Cdo1,Olig1,Rnf122	OPCs	ScType+CMA	progenitor cell	0.5
10	Cspg4,C1ql1,Pdgfra,Sox6,Lhfpl3,Qpct,Cdo1,Olig1,Rnf122	OPCs	ScType+scMarkerAgent	Oligodendrocyte Progenitor Cell-like	0.5
10	Cspg4,C1ql1,Pdgfra,Sox6,Lhfpl3,Qpct,Cdo1,Olig1,Rnf122	OPCs	ScType+scMarkerAgent+LLM	oligodendrocyte precursor cell	1
10	Cspg4,C1ql1,Pdgfra,Sox6,Lhfpl3,Qpct,Cdo1,Olig1,Rnf122	OPCs	CASSIA	OPC / NG2 glia (non-cycling oligodendrocyte precursor cells)	1
11	Tmem119,Selplg,Cx3cr1,P2ry12,Trem2,Ctss,P2ry13,Gpr34,C1qb,Arhgap25,Il1a	Microglia	ScType+ACT	Glial cell	0.5
11	Tmem119,Selplg,Cx3cr1,P2ry12,Trem2,Ctss,P2ry13,Gpr34,C1qb,Arhgap25,Il1a	Microglia	ScType+CellMarker 2.0	Microglial cell	1
11	Tmem119,Selplg,Cx3cr1,P2ry12,Trem2,Ctss,P2ry13,Gpr34,C1qb,Arhgap25,Il1a	Microglia	ScType+CMA	hematopoietic cell/leukocyte/mononuclear cell	0.5
11	Tmem119,Selplg,Cx3cr1,P2ry12,Trem2,Ctss,P2ry13,Gpr34,C1qb,Arhgap25,Il1a	Microglia	ScType+scMarkerAgent	homeostatic microglia	1
11	Tmem119,Selplg,Cx3cr1,P2ry12,Trem2,Ctss,P2ry13,Gpr34,C1qb,Arhgap25,Il1a	Microglia	ScType+scMarkerAgent+LLM	homeostatic microglia	1
11	Tmem119,Selplg,Cx3cr1,P2ry12,Trem2,Ctss,P2ry13,Gpr34,C1qb,Arhgap25,Il1a	Microglia	CASSIA	resident microglia	1
12	Sst,Lhx6,Crhbp,Npy,Mki67,Lbp,Sox6,Baiap3,Rrad,Ly6c1,Spp1,Ngb,Tacr1	Neuron_Lhx6	ScType+ACT	Interneuron	0.5
12	Sst,Lhx6,Crhbp,Npy,Mki67,Lbp,Sox6,Baiap3,Rrad,Ly6c1,Spp1,Ngb,Tacr1	Neuron_Lhx6	ScType+CellMarker 2.0	Somatostatin GABAergic neuron	1
12	Sst,Lhx6,Crhbp,Npy,Mki67,Lbp,Sox6,Baiap3,Rrad,Ly6c1,Spp1,Ngb,Tacr1	Neuron_Lhx6	ScType+CMA	sst chodl GABAergic cortical interneuron	0.5
12	Sst,Lhx6,Crhbp,Npy,Mki67,Lbp,Sox6,Baiap3,Rrad,Ly6c1,Spp1,Ngb,Tacr1	Neuron_Lhx6	ScType+scMarkerAgent	hypothalamic neuron	0.5
12	Sst,Lhx6,Crhbp,Npy,Mki67,Lbp,Sox6,Baiap3,Rrad,Ly6c1,Spp1,Ngb,Tacr1	Neuron_Lhx6	ScType+scMarkerAgent+LLM	somatostatin-expressing interneuron	1
12	Sst,Lhx6,Crhbp,Npy,Mki67,Lbp,Sox6,Baiap3,Rrad,Ly6c1,Spp1,Ngb,Tacr1	Neuron_Lhx6	CASSIA	MGE-derived GABAergic inhibitory interneurons, Sst lineage	1
13	Slc30a3,Sv2c,Rprm,Islr,Kl,Car4,Cidea,Nptx1,Rbm3,Nrn1,Slc38a5,Abhd6,Rbfox3,Ttr,Syne1,Cntn1	Neuron_Nptx1	ScType+ACT	Vein endothelial cell	0
13	Slc30a3,Sv2c,Rprm,Islr,Kl,Car4,Cidea,Nptx1,Rbm3,Nrn1,Slc38a5,Abhd6,Rbfox3,Ttr,Syne1,Cntn1	Neuron_Nptx1	ScType+CellMarker 2.0	Pyramidal cell	0.5
13	Slc30a3,Sv2c,Rprm,Islr,Kl,Car4,Cidea,Nptx1,Rbm3,Nrn1,Slc38a5,Abhd6,Rbfox3,Ttr,Syne1,Cntn1	Neuron_Nptx1	ScType+CMA	L2/3-6 intratelencephalic projecting glutamatergic neuron/L4/5 intratelencephalic projecting glutamatergic neuron/L4/5 intratelencephalic projecting glutamatergic neuron of the primary motor cortex/L6 intratelencephalic projecting glutamatergic neuron of the primary motor cortex/pyramidal neuron	0.5
13	Slc30a3,Sv2c,Rprm,Islr,Kl,Car4,Cidea,Nptx1,Rbm3,Nrn1,Slc38a5,Abhd6,Rbfox3,Ttr,Syne1,Cntn1	Neuron_Nptx1	ScType+scMarkerAgent	Kl positive NSC	0
13	Slc30a3,Sv2c,Rprm,Islr,Kl,Car4,Cidea,Nptx1,Rbm3,Nrn1,Slc38a5,Abhd6,Rbfox3,Ttr,Syne1,Cntn1	Neuron_Nptx1	ScType+scMarkerAgent+LLM	neuron	0.5
13	Slc30a3,Sv2c,Rprm,Islr,Kl,Car4,Cidea,Nptx1,Rbm3,Nrn1,Slc38a5,Abhd6,Rbfox3,Ttr,Syne1,Cntn1	Neuron_Nptx1	CASSIA	Excitatory glutamatergic neuron	0.5
14	Lhx6,Pvalb,Sox6,Crhbp,Ass1,Tac1,P2ry13,Abhd6,Cartpt,Npy,Pdlim3,Ms4a4a,Ms4a7,Sept4,Spp1	Neuron_Lhx6	ScType+ACT	Interneuron	0.5
14	Lhx6,Pvalb,Sox6,Crhbp,Ass1,Tac1,P2ry13,Abhd6,Cartpt,Npy,Pdlim3,Ms4a4a,Ms4a7,Sept4,Spp1	Neuron_Lhx6	ScType+CellMarker 2.0	Interneuron	0.5
14	Lhx6,Pvalb,Sox6,Crhbp,Ass1,Tac1,P2ry13,Abhd6,Cartpt,Npy,Pdlim3,Ms4a4a,Ms4a7,Sept4,Spp1	Neuron_Lhx6	ScType+CMA	GABAergic interneuron	0.5
14	Lhx6,Pvalb,Sox6,Crhbp,Ass1,Tac1,P2ry13,Abhd6,Cartpt,Npy,Pdlim3,Ms4a4a,Ms4a7,Sept4,Spp1	Neuron_Lhx6	ScType+scMarkerAgent	pvalb GABAergic cortical interneuron	1
14	Lhx6,Pvalb,Sox6,Crhbp,Ass1,Tac1,P2ry13,Abhd6,Cartpt,Npy,Pdlim3,Ms4a4a,Ms4a7,Sept4,Spp1	Neuron_Lhx6	ScType+scMarkerAgent+LLM	pvalb GABAergic cortical interneuron	1
14	Lhx6,Pvalb,Sox6,Crhbp,Ass1,Tac1,P2ry13,Abhd6,Cartpt,Npy,Pdlim3,Ms4a4a,Ms4a7,Sept4,Spp1	Neuron_Lhx6	CASSIA	Mixed cluster: PV-like MGE-derived GABAergic interneurons and microglia/myeloid cells (likely doublet-enriched / under-resolved).	0.5
15	Crym,Cnr1,Abhd6,Dusp1,Rbfox3,Grp,Sv2c,Sept4,Cntn1,Tubb4a,Cidea	Neuron_Crym	ScType+ACT	Tanycyte	0
15	Crym,Cnr1,Abhd6,Dusp1,Rbfox3,Grp,Sv2c,Sept4,Cntn1,Tubb4a,Cidea	Neuron_Crym	ScType+CellMarker 2.0	Corticofugal Projection Neuron	0.5
15	Crym,Cnr1,Abhd6,Dusp1,Rbfox3,Grp,Sv2c,Sept4,Cntn1,Tubb4a,Cidea	Neuron_Crym	ScType+CMA	hippocampal pyramidal neuron	0.5
15	Crym,Cnr1,Abhd6,Dusp1,Rbfox3,Grp,Sv2c,Sept4,Cntn1,Tubb4a,Cidea	Neuron_Crym	ScType+scMarkerAgent	neuron	0.5
15	Crym,Cnr1,Abhd6,Dusp1,Rbfox3,Grp,Sv2c,Sept4,Cntn1,Tubb4a,Cidea	Neuron_Crym	ScType+scMarkerAgent+LLM	pyramidal neuron	0.5
15	Crym,Cnr1,Abhd6,Dusp1,Rbfox3,Grp,Sv2c,Sept4,Cntn1,Tubb4a,Cidea	Neuron_Crym	CASSIA	Excitatory (glutamatergic) projection neuron from cortex/limbic forebrain	0.5
16	Htr3a,Cnr1,Npy,Qpct,Vip,Cidea,Car3,Sv2c,Tac2	Neuron_Cnr1	ScType+ACT	Inhibitory interneuron	0.5
16	Htr3a,Cnr1,Npy,Qpct,Vip,Cidea,Car3,Sv2c,Tac2	Neuron_Cnr1	ScType+CellMarker 2.0	Non-MGE(Medial ganglionic eminence)-derived interneuron	1
16	Htr3a,Cnr1,Npy,Qpct,Vip,Cidea,Car3,Sv2c,Tac2	Neuron_Cnr1	ScType+CMA	neural cell	0.5
16	Htr3a,Cnr1,Npy,Qpct,Vip,Cidea,Car3,Sv2c,Tac2	Neuron_Cnr1	ScType+scMarkerAgent	neuronal nitric oxide synthase-type II cell	1
16	Htr3a,Cnr1,Npy,Qpct,Vip,Cidea,Car3,Sv2c,Tac2	Neuron_Cnr1	ScType+scMarkerAgent+LLM	vasoactive intestinal peptide secreting cell	1
16	Htr3a,Cnr1,Npy,Qpct,Vip,Cidea,Car3,Sv2c,Tac2	Neuron_Cnr1	CASSIA	GABAergic interneuron (Vip/Htr3a-lineage)	1
17	Kl,Crym,Slc30a3,Nptx1,Nrn1,Fos,Abhd6,Rbm3,Rbfox3	Neuron_Crym	ScType+ACT	Tanycyte	0
17	Kl,Crym,Slc30a3,Nptx1,Nrn1,Fos,Abhd6,Rbm3,Rbfox3	Neuron_Crym	ScType+CellMarker 2.0	Corticofugal Projection Neuron	0.5
17	Kl,Crym,Slc30a3,Nptx1,Nrn1,Fos,Abhd6,Rbm3,Rbfox3	Neuron_Crym	ScType+CMA	hippocampal pyramidal neuron	0.5
17	Kl,Crym,Slc30a3,Nptx1,Nrn1,Fos,Abhd6,Rbm3,Rbfox3	Neuron_Crym	ScType+scMarkerAgent	Kl positive NSC	0
17	Kl,Crym,Slc30a3,Nptx1,Nrn1,Fos,Abhd6,Rbm3,Rbfox3	Neuron_Crym	ScType+scMarkerAgent+LLM	neuron	0.5
17	Kl,Crym,Slc30a3,Nptx1,Nrn1,Fos,Abhd6,Rbm3,Rbfox3	Neuron_Crym	CASSIA	Excitatory zincergic projection neurons (Crym⁺/Slc30a3⁺ mature pyramidal-like neurons, likely cortical/hippocampal)	0.5
18	Fos,Dusp1,Dkkl1,tdTomato	Neuron_Dusp1	ScType+ACT	T cell	0
18	Fos,Dusp1,Dkkl1,tdTomato	Neuron_Dusp1	ScType+CellMarker 2.0	Pyramidal cell	0.5
18	Fos,Dusp1,Dkkl1,tdTomato	Neuron_Dusp1	ScType+CMA	L2/3-6 intratelencephalic projecting glutamatergic neuron/L4/5 intratelencephalic projecting glutamatergic neuron/L4/5 intratelencephalic projecting glutamatergic neuron of the primary motor cortex/L6 intratelencephalic projecting glutamatergic neuron of the primary motor cortex/pyramidal neuron	0.5
18	Fos,Dusp1,Dkkl1,tdTomato	Neuron_Dusp1	ScType+scMarkerAgent	neuron	0.5
18	Fos,Dusp1,Dkkl1,tdTomato	Neuron_Dusp1	ScType+scMarkerAgent+LLM	preoptic area ultrasound-induced hypothermia neuron	0.5
18	Fos,Dusp1,Dkkl1,tdTomato	Neuron_Dusp1	CASSIA	Neurons	0.5
19	Car4,Crym,Cidea,Ackr1,Nptx1,Nrn1,Kl,Abhd6,Rbfox3,Ecrg4,Tubb4a	Neuron_Nrn1	ScType+ACT	Brain capillary endothelial cell	0
19	Car4,Crym,Cidea,Ackr1,Nptx1,Nrn1,Kl,Abhd6,Rbfox3,Ecrg4,Tubb4a	Neuron_Nrn1	ScType+CellMarker 2.0	Pyramidal cell	0.5
19	Car4,Crym,Cidea,Ackr1,Nptx1,Nrn1,Kl,Abhd6,Rbfox3,Ecrg4,Tubb4a	Neuron_Nrn1	ScType+CMA	L2/3-6 intratelencephalic projecting glutamatergic neuron/L4/5 intratelencephalic projecting glutamatergic neuron/L4/5 intratelencephalic projecting glutamatergic neuron of the primary motor cortex/L6 intratelencephalic projecting glutamatergic neuron of the primary motor cortex/pyramidal neuron	0.5
19	Car4,Crym,Cidea,Ackr1,Nptx1,Nrn1,Kl,Abhd6,Rbfox3,Ecrg4,Tubb4a	Neuron_Nrn1	ScType+scMarkerAgent	neuron	0.5
19	Car4,Crym,Cidea,Ackr1,Nptx1,Nrn1,Kl,Abhd6,Rbfox3,Ecrg4,Tubb4a	Neuron_Nrn1	ScType+scMarkerAgent+LLM	neuron	0.5
19	Car4,Crym,Cidea,Ackr1,Nptx1,Nrn1,Kl,Abhd6,Rbfox3,Ecrg4,Tubb4a	Neuron_Nrn1	CASSIA	Mixed cluster: neuron-enriched with choroid plexus/ependymal and endothelial signatures (likely heterogeneous / doublet-enriched).	0.5
20	Tac2,Tacr1,Sostdc1,Sv2c,Sox6,Baiap3,Gfap,Lhfpl3,Nrn1,Cartpt,Tac1,Ngb,Ttr,Ecrg4,Ccdc153,Syne1	Neuron_Tac2	ScType+ACT	GABAergic neuron	0.5
20	Tac2,Tacr1,Sostdc1,Sv2c,Sox6,Baiap3,Gfap,Lhfpl3,Nrn1,Cartpt,Tac1,Ngb,Ttr,Ecrg4,Ccdc153,Syne1	Neuron_Tac2	ScType+CellMarker 2.0	CCK basket cell	0
20	Tac2,Tacr1,Sostdc1,Sv2c,Sox6,Baiap3,Gfap,Lhfpl3,Nrn1,Cartpt,Tac1,Ngb,Ttr,Ecrg4,Ccdc153,Syne1	Neuron_Tac2	ScType+CMA	basket cell	0
20	Tac2,Tacr1,Sostdc1,Sv2c,Sox6,Baiap3,Gfap,Lhfpl3,Nrn1,Cartpt,Tac1,Ngb,Ttr,Ecrg4,Ccdc153,Syne1	Neuron_Tac2	ScType+scMarkerAgent	EASI-FISH cluster 1/habenula/Kiss1/Tac2 neuron/kisspeptin neuron/KNDy neuron/LepRb^Kiss1/Tac2/Pdyn neuron/medial habenula/Tac2-Pax6 cell/TAC3-positive striatal interneuron/TH positive neuron	0.5
20	Tac2,Tacr1,Sostdc1,Sv2c,Sox6,Baiap3,Gfap,Lhfpl3,Nrn1,Cartpt,Tac1,Ngb,Ttr,Ecrg4,Ccdc153,Syne1	Neuron_Tac2	ScType+scMarkerAgent+LLM	medial habenula	1
20	Tac2,Tacr1,Sostdc1,Sv2c,Sox6,Baiap3,Gfap,Lhfpl3,Nrn1,Cartpt,Tac1,Ngb,Ttr,Ecrg4,Ccdc153,Syne1	Neuron_Tac2	CASSIA	Choroid plexus / CSF-interface cells	0.5
21	Enpp6,Cldn11,Mag,Rnf122,Depp1,Mog,Mobp,Lyz2,Olig1,C1ql1,Gsn,Lum,Pf4,Lcn2,Crip1,Lrg1,Opalin,Tfcp2l1,Cnp,Cldn2,Sox6,Ms4a6d,Plp1	Oligodendrocytes_2	ScType+ACT	Oligodendrocyte	1
21	Enpp6,Cldn11,Mag,Rnf122,Depp1,Mog,Mobp,Lyz2,Olig1,C1ql1,Gsn,Lum,Pf4,Lcn2,Crip1,Lrg1,Opalin,Tfcp2l1,Cnp,Cldn2,Sox6,Ms4a6d,Plp1	Oligodendrocytes_2	ScType+CellMarker 2.0	Oligodendrocyte	1
21	Enpp6,Cldn11,Mag,Rnf122,Depp1,Mog,Mobp,Lyz2,Olig1,C1ql1,Gsn,Lum,Pf4,Lcn2,Crip1,Lrg1,Opalin,Tfcp2l1,Cnp,Cldn2,Sox6,Ms4a6d,Plp1	Oligodendrocytes_2	ScType+CMA	macroglial cell	0.5
21	Enpp6,Cldn11,Mag,Rnf122,Depp1,Mog,Mobp,Lyz2,Olig1,C1ql1,Gsn,Lum,Pf4,Lcn2,Crip1,Lrg1,Opalin,Tfcp2l1,Cnp,Cldn2,Sox6,Ms4a6d,Plp1	Oligodendrocytes_2	ScType+scMarkerAgent	oligodendrocyte	1
21	Enpp6,Cldn11,Mag,Rnf122,Depp1,Mog,Mobp,Lyz2,Olig1,C1ql1,Gsn,Lum,Pf4,Lcn2,Crip1,Lrg1,Opalin,Tfcp2l1,Cnp,Cldn2,Sox6,Ms4a6d,Plp1	Oligodendrocytes_2	ScType+scMarkerAgent+LLM	oligodendrocyte	1
21	Enpp6,Cldn11,Mag,Rnf122,Depp1,Mog,Mobp,Lyz2,Olig1,C1ql1,Gsn,Lum,Pf4,Lcn2,Crip1,Lrg1,Opalin,Tfcp2l1,Cnp,Cldn2,Sox6,Ms4a6d,Plp1	Oligodendrocytes_2	CASSIA	Oligodendrocyte lineage cell (myelinating glial cell) from the CNS	1
22	Mobp,Cldn11,Mag,Mog,Klk6,Hapln2,Gpr88,Penk,Enpp6,Opalin,Mal,Gsn,Trf,Lyz2,Depp1,Enpp2,Ms4a6d,Cldn2,Pf4,Lum,Cnp,Lcn2,Sept4,Plp1	Oligodendrocytes_1	ScType+ACT	Oligodendrocyte	1
22	Mobp,Cldn11,Mag,Mog,Klk6,Hapln2,Gpr88,Penk,Enpp6,Opalin,Mal,Gsn,Trf,Lyz2,Depp1,Enpp2,Ms4a6d,Cldn2,Pf4,Lum,Cnp,Lcn2,Sept4,Plp1	Oligodendrocytes_1	ScType+CellMarker 2.0	Oligodendrocyte	1
22	Mobp,Cldn11,Mag,Mog,Klk6,Hapln2,Gpr88,Penk,Enpp6,Opalin,Mal,Gsn,Trf,Lyz2,Depp1,Enpp2,Ms4a6d,Cldn2,Pf4,Lum,Cnp,Lcn2,Sept4,Plp1	Oligodendrocytes_1	ScType+CMA	macroglial cell	0.5
22	Mobp,Cldn11,Mag,Mog,Klk6,Hapln2,Gpr88,Penk,Enpp6,Opalin,Mal,Gsn,Trf,Lyz2,Depp1,Enpp2,Ms4a6d,Cldn2,Pf4,Lum,Cnp,Lcn2,Sept4,Plp1	Oligodendrocytes_1	ScType+scMarkerAgent	mature myelinating oligodendrocyte	1
22	Mobp,Cldn11,Mag,Mog,Klk6,Hapln2,Gpr88,Penk,Enpp6,Opalin,Mal,Gsn,Trf,Lyz2,Depp1,Enpp2,Ms4a6d,Cldn2,Pf4,Lum,Cnp,Lcn2,Sept4,Plp1	Oligodendrocytes_1	ScType+scMarkerAgent+LLM	mature myelinating oligodendrocyte	1
22	Mobp,Cldn11,Mag,Mog,Klk6,Hapln2,Gpr88,Penk,Enpp6,Opalin,Mal,Gsn,Trf,Lyz2,Depp1,Enpp2,Ms4a6d,Cldn2,Pf4,Lum,Cnp,Lcn2,Sept4,Plp1	Oligodendrocytes_1	CASSIA	Mature myelinating oligodendrocytes (oligodendrocyte lineage)	1
23	Six3,Pvalb,Spp1,Npy,Sv2c,Sst,Lhfpl3,Ms4a7,Kcne2,Sept4	Neuron_Pvalb	ScType+ACT	Interneuron	0.5
23	Six3,Pvalb,Spp1,Npy,Sv2c,Sst,Lhfpl3,Ms4a7,Kcne2,Sept4	Neuron_Pvalb	ScType+CellMarker 2.0	Inhibitory neuron	0.5
23	Six3,Pvalb,Spp1,Npy,Sv2c,Sst,Lhfpl3,Ms4a7,Kcne2,Sept4	Neuron_Pvalb	ScType+CMA	inhibitory interneuron/Mauthner neuron/Rohon-Beard neuron	0
23	Six3,Pvalb,Spp1,Npy,Sv2c,Sst,Lhfpl3,Ms4a7,Kcne2,Sept4	Neuron_Pvalb	ScType+scMarkerAgent	reticular nucleu	0.5
23	Six3,Pvalb,Spp1,Npy,Sv2c,Sst,Lhfpl3,Ms4a7,Kcne2,Sept4	Neuron_Pvalb	ScType+scMarkerAgent+LLM	reticular nucleu	0.5
23	Six3,Pvalb,Spp1,Npy,Sv2c,Sst,Lhfpl3,Ms4a7,Kcne2,Sept4	Neuron_Pvalb	CASSIA	GABAergic inhibitory interneurons (Pvalb/Sst/Npy-expressing, forebrain-like)	0.5
24	Tmem212,Ccdc153,Lbp,Calml4,Folr1,Musk,Krt18,Acta2,Myl9,Sox6,Ecrg4,Crip1,Gfap,Itih5,Gsn,Igfbp2,Slc2a1,Sostdc1,Ttr,Gja1,Serping1,Mki67,Cldn2,Kl,Car3,Pdlim3,Syne1,Clu	Ependymal cells	ScType+ACT	Ependymal cell	0.5
24	Tmem212,Ccdc153,Lbp,Calml4,Folr1,Musk,Krt18,Acta2,Myl9,Sox6,Ecrg4,Crip1,Gfap,Itih5,Gsn,Igfbp2,Slc2a1,Sostdc1,Ttr,Gja1,Serping1,Mki67,Cldn2,Kl,Car3,Pdlim3,Syne1,Clu	Ependymal cells	ScType+CellMarker 2.0	Ependymal cell	0.5
24	Tmem212,Ccdc153,Lbp,Calml4,Folr1,Musk,Krt18,Acta2,Myl9,Sox6,Ecrg4,Crip1,Gfap,Itih5,Gsn,Igfbp2,Slc2a1,Sostdc1,Ttr,Gja1,Serping1,Mki67,Cldn2,Kl,Car3,Pdlim3,Syne1,Clu	Ependymal cells	ScType+CMA	columnar/cuboidal epithelial cell	0.5
24	Tmem212,Ccdc153,Lbp,Calml4,Folr1,Musk,Krt18,Acta2,Myl9,Sox6,Ecrg4,Crip1,Gfap,Itih5,Gsn,Igfbp2,Slc2a1,Sostdc1,Ttr,Gja1,Serping1,Mki67,Cldn2,Kl,Car3,Pdlim3,Syne1,Clu	Ependymal cells	ScType+scMarkerAgent	ependymal cell	0.5
24	Tmem212,Ccdc153,Lbp,Calml4,Folr1,Musk,Krt18,Acta2,Myl9,Sox6,Ecrg4,Crip1,Gfap,Itih5,Gsn,Igfbp2,Slc2a1,Sostdc1,Ttr,Gja1,Serping1,Mki67,Cldn2,Kl,Car3,Pdlim3,Syne1,Clu	Ependymal cells	ScType+scMarkerAgent+LLM	choroid plexus epithelial cell	1
24	Tmem212,Ccdc153,Lbp,Calml4,Folr1,Musk,Krt18,Acta2,Myl9,Sox6,Ecrg4,Crip1,Gfap,Itih5,Gsn,Igfbp2,Slc2a1,Sostdc1,Ttr,Gja1,Serping1,Mki67,Cldn2,Kl,Car3,Pdlim3,Syne1,Clu	Ependymal cells	CASSIA	Choroid plexus epithelial cells (secretory/niche subtype)	1
25	Sostdc1,Kl,Kcnj13,Ecrg4,Mki67,Cldn2,Folr1,Ccdc153,Islr,Pcolce,Car3,Lcn2,Lhx6,Spp1,Grp,Ms4a4a,Vipr2,Tacr1,Slc6a13,Gsn,Mgp,Flt1,Ttr,Dcn,Serpina3f,Lbp,Pf4,Tfcp2l1,Klk6,C1qb,Prlr,Trem2,Tnfaip6,Apod,Igfbp2,Bgn,Lrg1,Utp14b,Rbm3,Enpp2	Choroid plexus epithelial cells	ScType+ACT	Epithelial cell	0.5
25	Sostdc1,Kl,Kcnj13,Ecrg4,Mki67,Cldn2,Folr1,Ccdc153,Islr,Pcolce,Car3,Lcn2,Lhx6,Spp1,Grp,Ms4a4a,Vipr2,Tacr1,Slc6a13,Gsn,Mgp,Flt1,Ttr,Dcn,Serpina3f,Lbp,Pf4,Tfcp2l1,Klk6,C1qb,Prlr,Trem2,Tnfaip6,Apod,Igfbp2,Bgn,Lrg1,Utp14b,Rbm3,Enpp2	Choroid plexus epithelial cells	ScType+CellMarker 2.0	Choroid plexus cell	0.5
25	Sostdc1,Kl,Kcnj13,Ecrg4,Mki67,Cldn2,Folr1,Ccdc153,Islr,Pcolce,Car3,Lcn2,Lhx6,Spp1,Grp,Ms4a4a,Vipr2,Tacr1,Slc6a13,Gsn,Mgp,Flt1,Ttr,Dcn,Serpina3f,Lbp,Pf4,Tfcp2l1,Klk6,C1qb,Prlr,Trem2,Tnfaip6,Apod,Igfbp2,Bgn,Lrg1,Utp14b,Rbm3,Enpp2	Choroid plexus epithelial cells	ScType+CMA	choroid plexus epithelial cell	1
25	Sostdc1,Kl,Kcnj13,Ecrg4,Mki67,Cldn2,Folr1,Ccdc153,Islr,Pcolce,Car3,Lcn2,Lhx6,Spp1,Grp,Ms4a4a,Vipr2,Tacr1,Slc6a13,Gsn,Mgp,Flt1,Ttr,Dcn,Serpina3f,Lbp,Pf4,Tfcp2l1,Klk6,C1qb,Prlr,Trem2,Tnfaip6,Apod,Igfbp2,Bgn,Lrg1,Utp14b,Rbm3,Enpp2	Choroid plexus epithelial cells	ScType+scMarkerAgent	choroid plexus epithelial cell	1
25	Sostdc1,Kl,Kcnj13,Ecrg4,Mki67,Cldn2,Folr1,Ccdc153,Islr,Pcolce,Car3,Lcn2,Lhx6,Spp1,Grp,Ms4a4a,Vipr2,Tacr1,Slc6a13,Gsn,Mgp,Flt1,Ttr,Dcn,Serpina3f,Lbp,Pf4,Tfcp2l1,Klk6,C1qb,Prlr,Trem2,Tnfaip6,Apod,Igfbp2,Bgn,Lrg1,Utp14b,Rbm3,Enpp2	Choroid plexus epithelial cells	ScType+scMarkerAgent+LLM	choroid plexus epithelial cell	1
25	Sostdc1,Kl,Kcnj13,Ecrg4,Mki67,Cldn2,Folr1,Ccdc153,Islr,Pcolce,Car3,Lcn2,Lhx6,Spp1,Grp,Ms4a4a,Vipr2,Tacr1,Slc6a13,Gsn,Mgp,Flt1,Ttr,Dcn,Serpina3f,Lbp,Pf4,Tfcp2l1,Klk6,C1qb,Prlr,Trem2,Tnfaip6,Apod,Igfbp2,Bgn,Lrg1,Utp14b,Rbm3,Enpp2	Choroid plexus epithelial cells	CASSIA	Choroid plexus epithelial cells – immune/inflammation-activated subtype (CSF barrier epithelium)	1
26	Sv2c,Tshz2,Slc30a3,Fos,Pvalb,Dusp1,Cd83,Rbfox3,Dkkl1,Ttr	Neuron_Dusp1	ScType+ACT	Radial glial cell	0
26	Sv2c,Tshz2,Slc30a3,Fos,Pvalb,Dusp1,Cd83,Rbfox3,Dkkl1,Ttr	Neuron_Dusp1	ScType+CellMarker 2.0	Excitatory neuron	0.5
26	Sv2c,Tshz2,Slc30a3,Fos,Pvalb,Dusp1,Cd83,Rbfox3,Dkkl1,Ttr	Neuron_Dusp1	ScType+CMA	interneuron	0.5
26	Sv2c,Tshz2,Slc30a3,Fos,Pvalb,Dusp1,Cd83,Rbfox3,Dkkl1,Ttr	Neuron_Dusp1	ScType+scMarkerAgent	subicular pyramidal cell	1
26	Sv2c,Tshz2,Slc30a3,Fos,Pvalb,Dusp1,Cd83,Rbfox3,Dkkl1,Ttr	Neuron_Dusp1	ScType+scMarkerAgent+LLM	subicular pyramidal cell	1
26	Sv2c,Tshz2,Slc30a3,Fos,Pvalb,Dusp1,Cd83,Rbfox3,Dkkl1,Ttr	Neuron_Dusp1	CASSIA	Mature neuron, Pvalb-expressing, highly active	1
27	Tacr1,Sv2c,Ass1,Six3,Qpct,Cntn1,Lhx6,Cartpt	Neuron_Tacr1	ScType+ACT	Peptidergic neuron	0.5
27	Tacr1,Sv2c,Ass1,Six3,Qpct,Cntn1,Lhx6,Cartpt	Neuron_Tacr1	ScType+CellMarker 2.0	Excitatory neuron	0
27	Tacr1,Sv2c,Ass1,Six3,Qpct,Cntn1,Lhx6,Cartpt	Neuron_Tacr1	ScType+CMA	L2/3 intratelencephalic projecting glutamatergic neuron	0
27	Tacr1,Sv2c,Ass1,Six3,Qpct,Cntn1,Lhx6,Cartpt	Neuron_Tacr1	ScType+scMarkerAgent	GABAergic neurons of the VTg/retrotrapezoid nucleus chemoreceptor neuron	0.5
27	Tacr1,Sv2c,Ass1,Six3,Qpct,Cntn1,Lhx6,Cartpt	Neuron_Tacr1	ScType+scMarkerAgent+LLM	Tacr1 neuron	1
27	Tacr1,Sv2c,Ass1,Six3,Qpct,Cntn1,Lhx6,Cartpt	Neuron_Tacr1	CASSIA	GABAergic MGE-derived neuropeptidergic hypothalamic/ventral forebrain neuron (Tacr1+/Cartpt+/Six3+/Lhx6+ subtype).	1
28	Cartpt,Chodl,Baiap3,Crhbp,Ngb,Qpct,Tac2,Mrc1,Ass1,Prlr,Nptx1,Gdf15,Enpp2,Il1a	Neuron_Baip3	ScType+ACT	Peptidergic neuron	1
28	Cartpt,Chodl,Baiap3,Crhbp,Ngb,Qpct,Tac2,Mrc1,Ass1,Prlr,Nptx1,Gdf15,Enpp2,Il1a	Neuron_Baip3	ScType+CellMarker 2.0	Peptidergic neuron	1
28	Cartpt,Chodl,Baiap3,Crhbp,Ngb,Qpct,Tac2,Mrc1,Ass1,Prlr,Nptx1,Gdf15,Enpp2,Il1a	Neuron_Baip3	ScType+CMA	L5/6 near-projecting glutamatergic neuron	0
28	Cartpt,Chodl,Baiap3,Crhbp,Ngb,Qpct,Tac2,Mrc1,Ass1,Prlr,Nptx1,Gdf15,Enpp2,Il1a	Neuron_Baip3	ScType+scMarkerAgent	medial preoptic nucleus Isolation neuron/neuroblast (sensu Nematoda and Protostomia)/noradrenergic neuron/pro-opiomelanocortin neuron	0
28	Cartpt,Chodl,Baiap3,Crhbp,Ngb,Qpct,Tac2,Mrc1,Ass1,Prlr,Nptx1,Gdf15,Enpp2,Il1a	Neuron_Baip3	ScType+scMarkerAgent+LLM	somatostatin-expressing interneuron	0.5
28	Cartpt,Chodl,Baiap3,Crhbp,Ngb,Qpct,Tac2,Mrc1,Ass1,Prlr,Nptx1,Gdf15,Enpp2,Il1a	Neuron_Baip3	CASSIA	GABAergic inhibitory neuron	0.5
29	Syne1,Tubb4a,Slc30a3,Cnr1,Abhd6,Ackr1,Crym,Gdf15,Mki67,Cd83,Musk,Vip,Tshz2,Kcnj13,Dkkl1,Gja1,Arhgap25,Lrg1,Ecrg4,Crip1,Lamp2,Htr3a,Mfge8,Ms4a7,Tfcp2l1,Rgs1,Tnfaip6	Neuron_Cnr1	ScType+ACT	Tanycyte	0
29	Syne1,Tubb4a,Slc30a3,Cnr1,Abhd6,Ackr1,Crym,Gdf15,Mki67,Cd83,Musk,Vip,Tshz2,Kcnj13,Dkkl1,Gja1,Arhgap25,Lrg1,Ecrg4,Crip1,Lamp2,Htr3a,Mfge8,Ms4a7,Tfcp2l1,Rgs1,Tnfaip6	Neuron_Cnr1	ScType+CellMarker 2.0	Martinotti cell	0
29	Syne1,Tubb4a,Slc30a3,Cnr1,Abhd6,Ackr1,Crym,Gdf15,Mki67,Cd83,Musk,Vip,Tshz2,Kcnj13,Dkkl1,Gja1,Arhgap25,Lrg1,Ecrg4,Crip1,Lamp2,Htr3a,Mfge8,Ms4a7,Tfcp2l1,Rgs1,Tnfaip6	Neuron_Cnr1	ScType+CMA	hippocampal pyramidal neuron	0.5
29	Syne1,Tubb4a,Slc30a3,Cnr1,Abhd6,Ackr1,Crym,Gdf15,Mki67,Cd83,Musk,Vip,Tshz2,Kcnj13,Dkkl1,Gja1,Arhgap25,Lrg1,Ecrg4,Crip1,Lamp2,Htr3a,Mfge8,Ms4a7,Tfcp2l1,Rgs1,Tnfaip6	Neuron_Cnr1	ScType+scMarkerAgent	cycling neuroblast (sensu Vertebrata)	0.5
29	Syne1,Tubb4a,Slc30a3,Cnr1,Abhd6,Ackr1,Crym,Gdf15,Mki67,Cd83,Musk,Vip,Tshz2,Kcnj13,Dkkl1,Gja1,Arhgap25,Lrg1,Ecrg4,Crip1,Lamp2,Htr3a,Mfge8,Ms4a7,Tfcp2l1,Rgs1,Tnfaip6	Neuron_Cnr1	ScType+scMarkerAgent+LLM	Interneurons from the CGE	1
29	Syne1,Tubb4a,Slc30a3,Cnr1,Abhd6,Ackr1,Crym,Gdf15,Mki67,Cd83,Musk,Vip,Tshz2,Kcnj13,Dkkl1,Gja1,Arhgap25,Lrg1,Ecrg4,Crip1,Lamp2,Htr3a,Mfge8,Ms4a7,Tfcp2l1,Rgs1,Tnfaip6	Neuron_Cnr1	CASSIA	Mixed neuronal–microglial–vascular/ependymal cluster (likely doublets/multiplets)	0.5
30	Tac1,Six3,Sv2c,Ms4a4a,Slc6a13,Otof,Syne1,Pcolce,Car3,Qpct,tdTomato,Cdo1,P2ry12,Dnase1l3,Penk,Ms4a7,Kl,Pf4,Top2a,Tacr1,Cidea,Crip1	Choroid plexus epithelial cells	ScType+ACT	Glutamatergic neuron	0.5
30	Tac1,Six3,Sv2c,Ms4a4a,Slc6a13,Otof,Syne1,Pcolce,Car3,Qpct,tdTomato,Cdo1,P2ry12,Dnase1l3,Penk,Ms4a7,Kl,Pf4,Top2a,Tacr1,Cidea,Crip1	Choroid plexus epithelial cells	ScType+CellMarker 2.0	D1 Medium spiny neuron(D1 MSN)/Striatonigral cell	0.5
30	Tac1,Six3,Sv2c,Ms4a4a,Slc6a13,Otof,Syne1,Pcolce,Car3,Qpct,tdTomato,Cdo1,P2ry12,Dnase1l3,Penk,Ms4a7,Kl,Pf4,Top2a,Tacr1,Cidea,Crip1	Choroid plexus epithelial cells	ScType+CMA	neuroblast (sensu Vertebrata)	0.5
30	Tac1,Six3,Sv2c,Ms4a4a,Slc6a13,Otof,Syne1,Pcolce,Car3,Qpct,tdTomato,Cdo1,P2ry12,Dnase1l3,Penk,Ms4a7,Kl,Pf4,Top2a,Tacr1,Cidea,Crip1	Choroid plexus epithelial cells	ScType+scMarkerAgent	accessory olfactory bulb granule layer/direct pathway medium spiny neuron/estrogen receptor (Esr1)-positive VMHvl neuronal population/gamma-aminobutyric acid (GABA)-expressing neurons in the preoptic area (POA) projecting to the tuberomammillary nucleus (TMN)/Sema3c/Tac1-expressing neuron/STR D1 Gaba direct pathway medium spiny neuron (Mmus)/ventral premammillary nucleus neuron	0.5
30	Tac1,Six3,Sv2c,Ms4a4a,Slc6a13,Otof,Syne1,Pcolce,Car3,Qpct,tdTomato,Cdo1,P2ry12,Dnase1l3,Penk,Ms4a7,Kl,Pf4,Top2a,Tacr1,Cidea,Crip1	Choroid plexus epithelial cells	ScType+scMarkerAgent+LLM	neuroblast	0.5
30	Tac1,Six3,Sv2c,Ms4a4a,Slc6a13,Otof,Syne1,Pcolce,Car3,Qpct,tdTomato,Cdo1,P2ry12,Dnase1l3,Penk,Ms4a7,Kl,Pf4,Top2a,Tacr1,Cidea,Crip1	Choroid plexus epithelial cells	CASSIA	Mixed cluster of Tac1-lineage GABAergic inhibitory neurons and microglia/perivascular myeloid cells (likely doublets or incompletely separated populations)	0.5
